# Supplementary material for: Progesterone modulates the DSCAM-AS1/miR-130a/ESR1 axis to suppress cell invasion and migration in breast cancer
Source: PubMed Central journal article supplement (PMC9798554; doi:10.1186/s13058-022-01597-x), 2022-12-28
Supplement: 13058_2022_1597_MOESM2_ESM.pdf [file 13058_2022_1597_MOESM2_ESM.pdf]

**Table S1: List of primer sequences**

| S.No. | Primer                           | Primer sequence (5'-3')                          | Comments                                                                       |
|-------|----------------------------------|--------------------------------------------------|--------------------------------------------------------------------------------|
| 1     | OAD2439_miR-130a-3p_F            | CAGTGCAATGTTAAAAGGGCAT                           | primers for screening expression of genes, lncRNAs and miRNAs by real time PCR |
| 2     | OAD2440_miR-301a-3p_F            | CAGTGCAATAGTATTGTCAAAGC                          |                                                                                |
| 3     | OAD2441_miR-193b-3p_F            | AACTGGCCCTCAAAGTCCCGCT                           |                                                                                |
| 4     | OAD2461_hsa-miR-548x-3p_F        | TAAAACTGCAATTACTTTC                              |                                                                                |
| 5     | OAD2462_hsa-miR-548aj-3p_F       | TAAAACTGCAATTACTTTTA                             |                                                                                |
| 6     | OAD2463_hsa-miR-335-3p_F         | TTTTTCATTATTGCTCCTGACC                           |                                                                                |
| 7     | OAD2464_hsa-miR-129-5p_F         | CTTTTTGCGGTCTGGGCTTGC                            |                                                                                |
| 8     | OAD2465_hsa-miR-4422_F           | AAAAGCATCAGGAAGTACCCA                            |                                                                                |
| 9     | OAD2466_hsa-miR-3121-5p_F        | TCCTTTGCCTATTCTATTTAAG                           |                                                                                |
| 10    | OAD1593_LINC01137_F              | ACAGGTAAAGCCGCGAACACTC                           |                                                                                |
| 11    | OAD1594_LINC01137_R              | AAGAGCTTGAGATCAGCCTGGG                           |                                                                                |
| 12    | OAD1597_RRS1-AS1_F               | GAGACCAGCGTGAATAAGATGGG                          |                                                                                |
| 13    | OAD1598_RRS1-AS1_R               | GTCTCAAACCTCGACCTCAGGTG                          |                                                                                |
| 14    | OAD1589_SOX9-AS1_F               | GGTTTCCATGTCCTTTGGCTTCTG                         |                                                                                |
| 15    | OAD1590_SOX9-AS1_R               | ACTGCTCTCATCCAAGGTGAACAG                         |                                                                                |
| 16    | OAD1575_CTB-92J24.3.2_F          | ATCTGGCTTGCATCTATGGGAGC                          |                                                                                |
| 17    | OAD1577_CTB-92J24.3.2_R          | CATAGTTGGTTGAGTGGCAGCAC                          |                                                                                |
| 18    | OAD1601_RP11-363E7.4_F           | GGGAACCTATGCCTGTCCAGTG                           |                                                                                |
| 19    | OAD1602_RP11-363E7.4_R           | CCAGTAAGTGGAATAGGTGGTTCG                         |                                                                                |
| 20    | OAD1595_RP11-21L23.2_F           | GGTCTTATTCTGCACCCAGGCT                           |                                                                                |
| 21    | OAD1596_RP11-21L23.2_R           | TAGCTGAGCATGGTGACGTATGC                          |                                                                                |
| 22    | OAD1579_DSCAM-AS1_R              | CGTCCATCTCTGTTGCCTGTTG                           |                                                                                |
| 23    | OAD1580_DSCAM-AS1_F              | CCACTCACTGACTTAGGTGCCT                           |                                                                                |
| 24    | OAD 233 5`SGK1_F                 | GCAGAAGAAGTGTCTATGCAGT                           |                                                                                |
| 25    | OAD 234 3`SGK1_R                 | CCGCTCCGACATAATATGCTT                            |                                                                                |
| 26    | OAD 131 5`ESR1_F                 | CCCCTCAACAGCGTGTCTC                              |                                                                                |
| 27    | OAD 132 3`ESR1_R                 | CGTCGATTATCTGAATTTGGCCT                          |                                                                                |
| 28    | OAD 121 5`PR-A/B_F               | AGCCCAACAATACAGCTTCGAG                           |                                                                                |
| 29    | OAD 122 3`PR-A/B_R               | TTTCGACCTCCAAGGACCAT                             |                                                                                |
| 30    | OAD 621_GR_F                     | GGACTCTGAACCTCCCTGGTCCG                          |                                                                                |
| 31    | OAD 622_GR_R                     | GCTGTTGAGGAGCTGGATGG                             |                                                                                |
| 32    | OAD2360_DSCAMAS1_si1_Sense       | AAGTTCTGGTCTCATCATGATCTATAGTGAGTCGTATTA          | DNA oligos for siRNA synthesis using <i>in vitro</i> transcription method      |
| 33    | OAD2361_DSCAMAS1_si1 Anti-Sense  | GGATCATGATGAGACCAGAACCTATAGTGAGTCGTATTA          |                                                                                |
| 34    | OAD2362_DSCAMAS1_si2_Sense       | TCCCTCCTCCAACCTGCCATTTCATAGTGAGTCGTATTA          |                                                                                |
| 35    | OAD2363_DSCAMAS1_si2 Anti-Sense  | ATAAATGGCAGTTGGAGGAGGCTATAGTGAGTCGTATTA          |                                                                                |
| 36    | OAD2364_DSCAMAS1_si3_Sense       | CCCACATAGGCATGACATACTCTATAGTGAGTCGTATTA          |                                                                                |
| 37    | OAD2365_DSCAMAS1_si3 Anti-Sense  | TGAGTATGTCATGCCTATGTGCTATAGTGAGTCGTATTA          |                                                                                |
| 38    | OAD2782_PGR_si1_Sense            | TACCTCAGAAGATTTGTTAACTATAGTGAGTCGTATTA           |                                                                                |
| 39    | OAD2783_PGR_si1 Anti-Sense       | GATTAACAACAAATCTCTGAGGCTATAGTGAGTCGTATTA         |                                                                                |
| 40    | OAD2784_PGR_si2_Sense            | TTACATATTGATGACCAGATACTATAGTGAGTCGTATTA          |                                                                                |
| 41    | OAD2785_PGR_si2 Anti-Sense       | GTTATCTGGTCATCAATATGTCTATAGTGAGTCGTATTA          |                                                                                |
| 42    | OAD2786_PGR_si3_Sense            | ATGAACAGCGGATGAAAGAATCTATAGTGAGTCGTATTA          |                                                                                |
| 43    | OAD2787_PGR_si3 Anti-Sense       | TGATTCCTTCCATCCGCTGTTCTATAGTGAGTCGTATTA          |                                                                                |
| 44    | OAD2778_Control_siRNA_Sense      | ATGAACCTCAGGGTCAGCTGTCTATAGTGAGTCGTATTA          |                                                                                |
| 45    | OAD2779_Control_siRNA Anti-Sense | CGGCAAGCTGACCCCTGAAGTTCTATAGTGAGTCGTATTA         |                                                                                |
| 46    | OAD2537_miR-130a_XbaI_F          | TGCTCTAGAAAGGTGGTCTGTGCTGGG                      | Primers for cloning in pcDNA3.1 vector.                                        |
| 47    | OAD2538_miR-130a_HindIII_R       | CCCAAGCTTACAGTAACGGAGGCAGTGTC                    |                                                                                |
| 48    | OAD1624_DSCAM-AS1_BamHI_F        | CGCGGATCCCTTTGGGAGGCTGAGGCAGGC                   |                                                                                |
| 49    | OAD2134_DSCAM-AS1_XbaI_R         | GCTCTAGAACTAAATGCATGCTTGATGGAGC                  | Primers for cloning in p-Babepuro vector.                                      |
| 50    | OAD1624_DSCAM-AS1_BamHI_F        | CGCGGATCCCTTTGGGAGGCTGAGGCAGGC                   |                                                                                |
| 51    | OAD1625_DSCAM-AS1_Sall_R         | GCCGTCGACACTAAATGCATGCTTGATGGAGC                 | primers to generate construct for luciferase assay                             |
| 52    | OAD1996_DSCAM-AS1_F              | GCTCTAGACTTTGGGAGGCTGAGGCAGGC                    |                                                                                |
| 53    | OAD2134_DSCAM-AS1_R              | GCTCTAGAACTAAATGCATGCTTGATGGAGC                  |                                                                                |
| 54    | OAD2763_DSCAM-AS1_Mutant_F       | GTGAGCTGAGATCATGCCACTACAGTGCACCAGCCTGGGTGACACAGC |                                                                                |
| 55    | OAD2764_DSCAM-AS1_Mutant_R       | GCTGTGTACCCAGGCTGGTGCATGTAGTGGCATGATCTCAGCTCAC   |                                                                                |
| 56    | OAD2712_3'-UTR-ESR1_F            | GCTCTAGAGCACCAATCCCAAGTTAATCCCC                  |                                                                                |
| 57    | OAD2714_3'-UTR-ESR1_R            | GCTCTAGAGCTGCGACAAAACCGAGTCAC                    |                                                                                |

**Table S2: Differentially expressed genes upon progesterone treatment to breast primary tum**

| S.No. | Gene         | Log2FoldChange | P-value |
|-------|--------------|----------------|---------|
| 1     | A1BG         | -1.17          | 0.00    |
| 2     | AAAS         | -0.75          | 0.00    |
| 3     | AAMP         | -0.70          | 0.00    |
| 4     | ABCC13       | 1.59           | 0.00    |
| 5     | ABHD14A      | -1.07          | 0.00    |
| 6     | ABHD14A-ACY1 | -1.29          | 0.00    |
| 7     | ABHD14B      | -1.68          | 0.00    |
| 8     | ABHD16A      | -1.21          | 0.00    |
| 9     | ABHD17A      | -1.23          | 0.00    |
| 10    | ACACA        | 0.83           | 0.00    |
| 11    | ACAP2        | 0.59           | 0.00    |
| 12    | ACBD4        | -0.83          | 0.01    |
| 13    | ACOT7        | -1.00          | 0.01    |
| 14    | ACOX2        | -3.10          | 0.00    |
| 15    | ACSM6        | 0.73           | 0.01    |
| 16    | ACTR8        | -0.47          | 0.00    |
| 17    | ACVR2A       | 0.75           | 0.00    |
| 18    | ACY1         | -0.96          | 0.01    |
| 19    | ADAM29       | 0.86           | 0.01    |
| 20    | ADAM32       | 0.63           | 0.01    |
| 21    | ADAM32       | 0.75           | 0.00    |
| 22    | ADAMTSL5     | -0.87          | 0.00    |
| 23    | ADARB1       | 0.83           | 0.00    |
| 24    | ADGRA2       | -0.89          | 0.01    |
| 25    | ADIRF        | -2.92          | 0.00    |
| 26    | ADO          | -0.58          | 0.00    |
| 27    | ADORA1       | -1.60          | 0.00    |
| 28    | ADPRHL2      | -0.86          | 0.00    |
| 29    | ADRA2A       | -1.45          | 0.00    |
| 30    | ADRB3        | 0.90           | 0.00    |
| 31    | AEBP2        | 0.55           | 0.00    |
| 32    | AFAP1L2      | -0.98          | 0.00    |
| 33    | AGAP2-AS1    | -1.65          | 0.00    |
| 34    | AGAP5        | 0.53           | 0.00    |
| 35    | AGBL1        | 1.17           | 0.01    |
| 36    | AGBL5        | -0.45          | 0.00    |
| 37    | AGFG2        | -0.74          | 0.00    |
| 38    | AGPAT1       | -3.89          | 0.00    |
| 39    | AGPAT1       | -3.89          | 0.00    |
| 40    | AGTRAP       | -0.94          | 0.01    |
| 41    | AHCYL2       | 0.44           | 0.01    |
| 42    | AIP          | -0.82          | 0.00    |
| 43    | AK1          | -0.89          | 0.00    |
| 44    | AKAP17A      | -0.53          | 0.01    |
| 45    | AKIP1        | -0.50          | 0.00    |
| 46    | ALKBH6       | -0.92          | 0.00    |
| 47    | AMOTL2       | -1.24          | 0.00    |

|    |              |       |      |
|----|--------------|-------|------|
| 48 | ANAPC11      | -1.05 | 0.00 |
| 49 | ANAPC15      | -0.57 | 0.00 |
| 50 | ANAPC4       | 0.45  | 0.00 |
| 51 | ANG          | -1.07 | 0.00 |
| 52 | ANGPTL3      | 1.65  | 0.00 |
| 53 | ANKRD18B     | 1.10  | 0.01 |
| 54 | ANKRD20A1    | 1.31  | 0.00 |
| 55 | ANKRD36      | 0.75  | 0.00 |
| 56 | ANKRD40      | -0.52 | 0.00 |
| 57 | ANKUB1       | 0.72  | 0.01 |
| 58 | ANXA11       | -0.88 | 0.00 |
| 59 | ANXA2R       | -1.00 | 0.00 |
| 60 | AP2S1        | -0.87 | 0.01 |
| 61 | APBB1        | -1.16 | 0.00 |
| 62 | APEH         | -0.66 | 0.00 |
| 63 | APLNR        | -0.76 | 0.00 |
| 64 | APOBEC3H     | -1.05 | 0.00 |
| 65 | APOM         | -1.07 | 0.00 |
| 66 | APRT         | -1.54 | 0.00 |
| 67 | AQP1         | -2.11 | 0.00 |
| 68 | ARAF         | -0.70 | 0.00 |
| 69 | ARHGAP29-AS1 | -2.09 | 0.00 |
| 70 | ARID1B       | 0.46  | 0.00 |
| 71 | ARIH2OS      | -0.63 | 0.01 |
| 72 | ARL2         | -0.98 | 0.00 |
| 73 | ARL6IP4      | -0.77 | 0.00 |
| 74 | ARMC5        | -0.63 | 0.01 |
| 75 | ARMC7        | -1.28 | 0.00 |
| 76 | ARRB2        | -0.46 | 0.00 |
| 77 | ARRDC1-AS1   | -0.51 | 0.01 |
| 78 | ASB18        | 0.88  | 0.00 |
| 79 | ASXL1        | 0.66  | 0.00 |
| 80 | ATAD2B       | 0.54  | 0.01 |
| 81 | ATF4         | -1.05 | 0.00 |
| 82 | ATF5         | -0.88 | 0.00 |
| 83 | ATL2         | 0.59  | 0.01 |
| 84 | ATP13A3      | 0.39  | 0.01 |
| 85 | ATP1B3       | 0.51  | 0.01 |
| 86 | ATP2C1       | 0.50  | 0.00 |
| 87 | ATP5F1D      | -1.04 | 0.00 |
| 88 | ATP5IF1      | -0.86 | 0.00 |
| 89 | ATP5MC1      | -1.22 | 0.00 |
| 90 | ATP5MC2      | -1.47 | 0.00 |
| 91 | ATP5MF       | -0.74 | 0.00 |
| 92 | ATP5MG       | -0.82 | 0.00 |
| 93 | ATP6V1F      | -0.75 | 0.01 |
| 94 | ATP9B        | 0.58  | 0.00 |
| 95 | ATR          | 0.53  | 0.00 |
| 96 | ATRX         | 0.55  | 0.00 |
| 97 | ATXN10       | 0.60  | 0.01 |

|     |           |       |      |
|-----|-----------|-------|------|
| 98  | B3GALT6   | -1.10 | 0.00 |
| 99  | B3GAT2    | 0.75  | 0.00 |
| 100 | B4GALNT2  | 0.77  | 0.00 |
| 101 | B4GALT2   | -0.95 | 0.00 |
| 102 | B9D1      | -0.91 | 0.01 |
| 103 | BABAM1    | -0.51 | 0.01 |
| 104 | BAIAP2-DT | -1.01 | 0.00 |
| 105 | BANF1     | -1.15 | 0.00 |
| 106 | BAP1      | -0.56 | 0.00 |
| 107 | BARX2     | -1.57 | 0.00 |
| 108 | BATF      | -1.31 | 0.00 |
| 109 | BAX       | -0.79 | 0.01 |
| 110 | BBS9      | 0.59  | 0.00 |
| 111 | BCAR3     | -0.82 | 0.01 |
| 112 | BCKDK     | -0.63 | 0.01 |
| 113 | BCL2L12   | -1.04 | 0.00 |
| 114 | BCL6B     | -0.92 | 0.00 |
| 115 | BCL7B     | -0.53 | 0.00 |
| 116 | BCL7C     | -0.61 | 0.00 |
| 117 | BEX4      | -1.04 | 0.00 |
| 118 | BIN1      | -0.76 | 0.00 |
| 119 | BIRC6     | 0.41  | 0.01 |
| 120 | BISPR     | -0.67 | 0.00 |
| 121 | BLOC1S1   | -1.04 | 0.00 |
| 122 | BMS1P1    | 0.57  | 0.01 |
| 123 | BOLA1     | -0.83 | 0.00 |
| 124 | BOLA3-AS1 | -0.82 | 0.00 |
| 125 | BORCS8    | -0.62 | 0.00 |
| 126 | BRAT1     | -0.78 | 0.00 |
| 127 | BRD2      | -0.90 | 0.01 |
| 128 | BRD3OS    | -0.80 | 0.00 |
| 129 | BRK1      | -0.61 | 0.01 |
| 130 | BRMS1     | -0.75 | 0.00 |
| 131 | BRPF1     | -0.74 | 0.00 |
| 132 | BSND      | 0.82  | 0.01 |
| 133 | BTBD1     | 0.37  | 0.01 |
| 134 | BUD13     | -0.69 | 0.00 |
| 135 | C11orf49  | 0.52  | 0.00 |
| 136 | C11orf52  | -1.26 | 0.00 |
| 137 | C11orf68  | -0.75 | 0.01 |
| 138 | C11orf71  | -0.84 | 0.00 |
| 139 | C11orf98  | -1.11 | 0.00 |
| 140 | C12orf10  | -0.78 | 0.00 |
| 141 | C12orf40  | 0.67  | 0.01 |
| 142 | C12orf43  | -0.49 | 0.00 |
| 143 | C12orf57  | -1.09 | 0.00 |
| 144 | C14orf93  | -0.52 | 0.00 |
| 145 | C16orf86  | -1.02 | 0.00 |
| 146 | C17orf100 | 0.43  | 0.01 |
| 147 | C17orf49  | -1.06 | 0.00 |

|     |             |       |      |
|-----|-------------|-------|------|
| 148 | C17orf97    | -1.70 | 0.00 |
| 149 | C17orf97    | -1.70 | 0.00 |
| 150 | C18orf54    | 0.88  | 0.00 |
| 151 | C19orf38    | -1.16 | 0.00 |
| 152 | C19orf53    | -1.81 | 0.00 |
| 153 | C19orf67    | -0.95 | 0.00 |
| 154 | C19orf73    | -1.53 | 0.00 |
| 155 | C1orf122    | -1.76 | 0.00 |
| 156 | C1orf162    | -0.86 | 0.01 |
| 157 | C1orf174    | -0.51 | 0.01 |
| 158 | C1orf216    | -0.47 | 0.00 |
| 159 | C1orf35     | -0.86 | 0.00 |
| 160 | C1QTNF5     | -1.25 | 0.00 |
| 161 | C22orf46    | -0.52 | 0.00 |
| 162 | C2CD2L      | -0.61 | 0.00 |
| 163 | C3orf18     | -1.34 | 0.00 |
| 164 | C4B         | -1.84 | 0.01 |
| 165 | C4orf3      | -0.60 | 0.00 |
| 166 | C5orf38     | -1.54 | 0.00 |
| 167 | C5orf66-AS1 | -2.42 | 0.01 |
| 168 | C6orf226    | -1.23 | 0.00 |
| 169 | C6orf47     | -1.32 | 0.00 |
| 170 | C6orf47     | -1.32 | 0.00 |
| 171 | C6orf47     | -1.32 | 0.00 |
| 172 | C7orf50     | -1.03 | 0.00 |
| 173 | C8orf34-AS1 | 0.60  | 0.00 |
| 174 | C8orf58     | -0.79 | 0.01 |
| 175 | C9orf16     | -2.14 | 0.00 |
| 176 | C9orf78     | -0.70 | 0.00 |
| 177 | CA11        | -1.93 | 0.00 |
| 178 | CACNA1B     | 2.00  | 0.00 |
| 179 | CACNA2D2    | -1.51 | 0.00 |
| 180 | CACNA2D4    | -0.95 | 0.00 |
| 181 | CADM3       | -1.86 | 0.00 |
| 182 | CALHM2      | -0.86 | 0.00 |
| 183 | CALM3       | -0.67 | 0.00 |
| 184 | CAMK1       | -0.99 | 0.00 |
| 185 | CAMKMT      | 0.52  | 0.00 |
| 186 | CAPN12      | -1.20 | 0.00 |
| 187 | CAPNS1      | -0.94 | 0.00 |
| 188 | CARD16      | -0.84 | 0.00 |
| 189 | CARD19      | -0.89 | 0.00 |
| 190 | CAVIN1      | -0.91 | 0.00 |
| 191 | CBS         | -1.46 | 0.01 |
| 192 | CBWD6       | 0.73  | 0.01 |
| 193 | CCDC103     | -1.35 | 0.01 |
| 194 | CCDC103     | -1.19 | 0.01 |
| 195 | CCDC107     | -0.97 | 0.00 |
| 196 | CCDC12      | -0.76 | 0.00 |
| 197 | CCDC124     | -0.90 | 0.00 |

|     |               |       |      |
|-----|---------------|-------|------|
| 198 | CCDC142       | -0.50 | 0.01 |
| 199 | CCDC159       | -0.66 | 0.01 |
| 200 | CCDC189       | -1.27 | 0.00 |
| 201 | CCDC24        | -1.27 | 0.00 |
| 202 | CCDC28B       | -0.81 | 0.00 |
| 203 | CCDC51        | -0.97 | 0.00 |
| 204 | CCDC71        | -0.83 | 0.00 |
| 205 | CCDC85A       | -1.92 | 0.00 |
| 206 | CCDC85B       | -1.13 | 0.00 |
| 207 | CCDC86        | -0.77 | 0.00 |
| 208 | CCDC89        | -1.07 | 0.00 |
| 209 | CCN2          | 1.09  | 0.01 |
| 210 | CCN5          | -1.95 | 0.00 |
| 211 | CCN6          | -2.45 | 0.00 |
| 212 | CCNYL1        | 0.49  | 0.00 |
| 213 | CCR10         | -1.14 | 0.00 |
| 214 | CCZ1B         | 0.73  | 0.00 |
| 215 | CD2BP2-DT     | -1.33 | 0.00 |
| 216 | CD33          | -0.81 | 0.01 |
| 217 | CD3EAP        | -0.81 | 0.00 |
| 218 | CD68          | -0.88 | 0.00 |
| 219 | CD74          | -1.92 | 0.00 |
| 220 | CDC37         | -0.90 | 0.00 |
| 221 | CDH19         | 1.73  | 0.00 |
| 222 | CDK11B        | -0.62 | 0.00 |
| 223 | CDK12         | 1.45  | 0.00 |
| 224 | CDK2          | -0.94 | 0.01 |
| 225 | CDKN2AIP      | -0.65 | 0.00 |
| 226 | CDKN2AIPNL    | -0.78 | 0.00 |
| 227 | CDR1          | -1.70 | 0.01 |
| 228 | CDRT1         | 1.32  | 0.00 |
| 229 | CDSN          | -4.20 | 0.00 |
| 230 | CERT1         | 0.42  | 0.00 |
| 231 | CES1P1        | -2.16 | 0.00 |
| 232 | CES2          | -0.69 | 0.00 |
| 233 | CES3          | 1.84  | 0.00 |
| 234 | CETP          | -1.27 | 0.00 |
| 235 | CFAP298       | -0.96 | 0.00 |
| 236 | CFB           | -2.25 | 0.00 |
| 237 | CH17-340M24.3 | -1.03 | 0.01 |
| 238 | CHCHD10       | -1.04 | 0.00 |
| 239 | CHCHD10       | -1.04 | 0.00 |
| 240 | CHCHD5        | -1.42 | 0.00 |
| 241 | CHMP2A        | -0.71 | 0.00 |
| 242 | CHRM5         | 0.71  | 0.00 |
| 243 | CHRN1         | -0.62 | 0.00 |
| 244 | CHRN1         | -0.62 | 0.00 |
| 245 | CHRN2         | -0.90 | 0.01 |
| 246 | CHST1         | -1.57 | 0.01 |
| 247 | CHST14        | -0.76 | 0.00 |

|     |             |       |      |
|-----|-------------|-------|------|
| 248 | CHST7       | -0.73 | 0.01 |
| 249 | CIART       | -1.13 | 0.00 |
| 250 | CIDEB       | -1.23 | 0.00 |
| 251 | CIDTCP1     | -0.84 | 0.00 |
| 252 | CLDN10      | 2.61  | 0.00 |
| 253 | CLEC11A     | -1.51 | 0.00 |
| 254 | CLPP        | -1.11 | 0.00 |
| 255 | CLTB        | -0.81 | 0.00 |
| 256 | CNOT2-DT    | -0.75 | 0.01 |
| 257 | CNOT6       | 0.58  | 0.01 |
| 258 | CNPPD1      | -1.01 | 0.00 |
| 259 | CNPY3       | -0.63 | 0.01 |
| 260 | CNPY4       | -0.56 | 0.01 |
| 261 | COA3        | -0.73 | 0.00 |
| 262 | COA4        | -1.14 | 0.00 |
| 263 | COA6-AS1    | -1.26 | 0.00 |
| 264 | COL2A1      | -2.27 | 0.00 |
| 265 | COMMD4      | -0.92 | 0.00 |
| 266 | COMMD9      | -0.76 | 0.01 |
| 267 | COPS6       | -0.57 | 0.00 |
| 268 | COPS9       | -1.03 | 0.00 |
| 269 | CORO2B      | -0.91 | 0.01 |
| 270 | COX1        | -1.39 | 0.00 |
| 271 | COX14       | -0.81 | 0.01 |
| 272 | COX2        | -1.65 | 0.00 |
| 273 | COX4I2      | -1.27 | 0.01 |
| 274 | COX6A1      | -0.95 | 0.00 |
| 275 | COX6B1      | -1.21 | 0.00 |
| 276 | COX7A1      | -1.48 | 0.00 |
| 277 | CPLANE2     | -0.96 | 0.00 |
| 278 | CPTP        | -1.18 | 0.00 |
| 279 | CREB3L2-AS1 | 1.28  | 0.00 |
| 280 | CRTAP       | -0.62 | 0.00 |
| 281 | CRTC2       | -0.51 | 0.01 |
| 282 | CSF1R       | -0.75 | 0.00 |
| 283 | CSF3R       | -1.15 | 0.00 |
| 284 | CST3        | -1.59 | 0.00 |
| 285 | CST7        | -1.03 | 0.01 |
| 286 | CTDSP1      | -0.90 | 0.00 |
| 287 | CTDSP2      | -0.72 | 0.00 |
| 288 | CTF1        | -0.96 | 0.01 |
| 289 | CTSF        | -1.24 | 0.00 |
| 290 | CUEDC2      | -0.69 | 0.01 |
| 291 | CUL3        | 0.38  | 0.00 |
| 292 | CUTA        | -1.13 | 0.00 |
| 293 | CUTA        | -1.10 | 0.00 |
| 294 | CX3CR1      | -1.53 | 0.00 |
| 295 | CYB561D2    | -0.87 | 0.00 |
| 296 | CYB5D1      | -0.77 | 0.00 |
| 297 | CYP2B7P     | -4.14 | 0.00 |

|     |             |       |      |
|-----|-------------|-------|------|
| 298 | CYP2T1P     | -1.42 | 0.00 |
| 299 | CYP46A1     | 0.54  | 0.00 |
| 300 | CYTB        | -1.36 | 0.00 |
| 301 | CYYR1-AS1   | 0.94  | 0.00 |
| 302 | CZIB        | -0.65 | 0.00 |
| 303 | DBET        | 1.49  | 0.00 |
| 304 | DBNDD2      | -1.54 | 0.00 |
| 305 | DCAF4L1     | 0.63  | 0.01 |
| 306 | DCAKD       | -0.73 | 0.00 |
| 307 | DCDC2       | -2.67 | 0.00 |
| 308 | DCLRE1B     | -0.75 | 0.00 |
| 309 | DCTN3       | -0.93 | 0.00 |
| 310 | DCUN1D2     | 0.74  | 0.00 |
| 311 | DDAH2       | -1.31 | 0.00 |
| 312 | DDAH2       | -1.08 | 0.00 |
| 313 | DDAH2       | -1.32 | 0.00 |
| 314 | DDAH2       | -1.32 | 0.00 |
| 315 | DDN-AS1     | -0.93 | 0.00 |
| 316 | DDRGK1      | -0.84 | 0.00 |
| 317 | DDT         | -1.28 | 0.00 |
| 318 | DDT         | -1.48 | 0.00 |
| 319 | DDX24       | -0.65 | 0.00 |
| 320 | DDX27       | -0.87 | 0.00 |
| 321 | DDX41       | -0.64 | 0.00 |
| 322 | DDX56       | -0.54 | 0.01 |
| 323 | DENND1C     | -0.82 | 0.01 |
| 324 | DENND2D     | -0.72 | 0.00 |
| 325 | DET1        | -0.76 | 0.00 |
| 326 | DFFA        | -0.42 | 0.00 |
| 327 | DGCR6       | -0.88 | 0.00 |
| 328 | DGCR6L      | -1.06 | 0.00 |
| 329 | DHPS        | -0.60 | 0.00 |
| 330 | DHRS4-AS1   | -0.62 | 0.00 |
| 331 | DHX36       | 0.74  | 0.00 |
| 332 | DIAPH1-AS1  | 0.82  | 0.00 |
| 333 | DLG1        | 0.60  | 0.00 |
| 334 | DLGAP1-AS5  | 1.96  | 0.00 |
| 335 | DMAC2       | -0.57 | 0.00 |
| 336 | DMAP1       | -0.57 | 0.00 |
| 337 | DMKN        | -2.04 | 0.00 |
| 338 | DMXL1       | 0.53  | 0.00 |
| 339 | DNA2        | 0.64  | 0.01 |
| 340 | DNAJB1      | -0.62 | 0.00 |
| 341 | DNAJB2      | -0.61 | 0.00 |
| 342 | DNAJC14     | -0.49 | 0.01 |
| 343 | DNAJC27-AS1 | -0.82 | 0.01 |
| 344 | DNAJC4      | -1.00 | 0.00 |
| 345 | DNAJC9-AS1  | -0.89 | 0.00 |
| 346 | DNLZ        | -1.01 | 0.00 |
| 347 | DNPH1       | -1.01 | 0.01 |



|     |           |       |      |
|-----|-----------|-------|------|
| 348 | DNTTIP1   | -0.60 | 0.01 |
| 349 | DOCK5     | 0.52  | 0.00 |
| 350 | DOK1      | -1.28 | 0.00 |
| 351 | DPM2      | -1.46 | 0.00 |
| 352 | DPM3      | -1.28 | 0.00 |
| 353 | DPT       | -1.20 | 0.01 |
| 354 | DPY19L1   | 0.80  | 0.01 |
| 355 | DRAM1     | 0.41  | 0.00 |
| 356 | DRAP1     | -0.94 | 0.00 |
| 357 | DSCAM-AS1 | -2.13 | 0.01 |
| 358 | DSCR9     | -0.90 | 0.00 |
| 359 | DTX3      | -1.11 | 0.00 |
| 360 | DUSP28    | -0.54 | 0.01 |
| 361 | DUSP7     | -0.90 | 0.01 |
| 362 | DVL3      | -0.65 | 0.00 |
| 363 | DXO       | -1.46 | 0.00 |
| 364 | DXO       | -1.46 | 0.00 |
| 365 | DXO       | -1.46 | 0.00 |
| 366 | DYNLRB1   | -0.73 | 0.00 |
| 367 | DYRK4     | -0.61 | 0.00 |
| 368 | ECE2      | -1.23 | 0.00 |
| 369 | ECSCR     | -1.19 | 0.00 |
| 370 | EDF1      | -1.02 | 0.00 |
| 371 | EED       | 0.37  | 0.00 |
| 372 | EFCAB3    | 0.45  | 0.00 |
| 373 | EFEMP2    | -1.14 | 0.00 |
| 374 | EFHB      | -0.90 | 0.01 |
| 375 | EFHC1     | 0.51  | 0.01 |
| 376 | EGFL8     | -2.14 | 0.00 |
| 377 | EGFL8     | -2.14 | 0.00 |
| 378 | EGFL8     | -2.05 | 0.00 |
| 379 | EGLN2     | -1.18 | 0.00 |
| 380 | EHMT1     | 0.65  | 0.01 |
| 381 | EID1      | -0.53 | 0.01 |
| 382 | EIF1AD    | -0.68 | 0.00 |
| 383 | EIF2B2    | -0.54 | 0.01 |
| 384 | EIF2B4    | -0.52 | 0.00 |
| 385 | EIF3F     | -0.65 | 0.00 |
| 386 | EIF3F     | -0.65 | 0.00 |
| 387 | EIF3G     | -0.74 | 0.00 |
| 388 | EIF3I     | -0.76 | 0.00 |
| 389 | EIF4EBP1  | -1.90 | 0.00 |
| 390 | EIF4EBP3  | -1.39 | 0.00 |
| 391 | EIF5AL1   | 0.63  | 0.00 |
| 392 | ELMOD1    | 1.47  | 0.00 |
| 393 | ELOA      | -0.62 | 0.00 |
| 394 | ELOF1     | -0.89 | 0.00 |
| 395 | ELOVL1    | -1.62 | 0.00 |
| 396 | ELOVL2    | -1.92 | 0.01 |
| 397 | ELP5      | -0.49 | 0.00 |

|     |            |       |      |
|-----|------------|-------|------|
| 398 | EMC10      | -0.94 | 0.00 |
| 399 | EMC6       | -1.41 | 0.01 |
| 400 | EML6       | 0.79  | 0.00 |
| 401 | ENHO       | -1.98 | 0.00 |
| 402 | ENKD1      | -0.68 | 0.01 |
| 403 | ENTPD3-AS1 | -0.74 | 0.00 |
| 404 | EP300      | 0.73  | 0.00 |
| 405 | EPHA5      | 2.90  | 0.00 |
| 406 | ERCC1      | -0.76 | 0.00 |
| 407 | ERP29      | -0.75 | 0.00 |
| 408 | ESAM       | -1.21 | 0.00 |
| 409 | ESS2       | -0.73 | 0.00 |
| 410 | ETNK1      | 0.60  | 0.00 |
| 411 | EWSR1      | -0.61 | 0.00 |
| 412 | FAAP20     | -0.78 | 0.01 |
| 413 | FAM117A    | -0.87 | 0.00 |
| 414 | FAM120AOS  | -0.61 | 0.01 |
| 415 | FAM122B    | 0.60  | 0.00 |
| 416 | FAM167B    | -1.17 | 0.01 |
| 417 | FAM174C    | -1.18 | 0.00 |
| 418 | FAM184B    | -1.54 | 0.00 |
| 419 | FAM200B    | -0.60 | 0.00 |
| 420 | FAM32A     | -0.66 | 0.00 |
| 421 | FAM3D      | 2.28  | 0.00 |
| 422 | FAM41C     | 1.26  | 0.00 |
| 423 | FAM50A     | -0.62 | 0.01 |
| 424 | FAM71E1    | -1.60 | 0.00 |
| 425 | FAM83A     | 2.06  | 0.00 |
| 426 | FAM86C1    | -0.76 | 0.00 |
| 427 | FAM89B     | -0.98 | 0.00 |
| 428 | FAM98B     | 0.62  | 0.00 |
| 429 | FANCL      | 0.52  | 0.01 |
| 430 | FARSA      | -0.77 | 0.00 |
| 431 | FASTKD1    | 0.53  | 0.00 |
| 432 | FAU        | -1.31 | 0.00 |
| 433 | FBXL13     | 1.38  | 0.00 |
| 434 | FBXL22     | -0.92 | 0.00 |
| 435 | FBXO11     | 0.51  | 0.00 |
| 436 | FBXO15     | 0.66  | 0.00 |
| 437 | FBXO2      | -1.42 | 0.01 |
| 438 | FCER1G     | -1.21 | 0.00 |
| 439 | FCHSD1     | -0.48 | 0.00 |
| 440 | FCN1       | -0.94 | 0.00 |
| 441 | FDCSP      | 3.40  | 0.00 |
| 442 | FENDRR     | 0.99  | 0.00 |
| 443 | FEZ1       | -0.82 | 0.00 |
| 444 | FGFBP3     | -1.05 | 0.00 |
| 445 | FHL2       | -1.91 | 0.00 |
| 446 | FHL3       | -0.93 | 0.00 |
| 447 | FIZ1       | -0.74 | 0.00 |

|     |            |       |      |
|-----|------------|-------|------|
| 448 | FJX1       | -1.15 | 0.00 |
| 449 | FKBP2      | -1.00 | 0.00 |
| 450 | FKBP8      | -0.66 | 0.01 |
| 451 | FLII       | -0.59 | 0.00 |
| 452 | FLII       | -0.59 | 0.00 |
| 453 | FLJ20021   | -1.06 | 0.00 |
| 454 | FLJ36000   | 0.95  | 0.01 |
| 455 | FLJ37453   | -0.66 | 0.00 |
| 456 | FLOT1      | -0.63 | 0.00 |
| 457 | FLOT1      | -0.63 | 0.00 |
| 458 | FLOT1      | -0.63 | 0.00 |
| 459 | FLOT1      | -1.14 | 0.01 |
| 460 | FLOT1      | -0.65 | 0.00 |
| 461 | FLOT1      | -0.64 | 0.00 |
| 462 | FLT3LG     | -0.73 | 0.00 |
| 463 | FMNL2      | 0.66  | 0.00 |
| 464 | FOCAD      | 0.57  | 0.01 |
| 465 | FOLR2      | -1.23 | 0.00 |
| 466 | FOXB1      | 1.49  | 0.00 |
| 467 | FOXH1      | -2.14 | 0.00 |
| 468 | FOXJ3      | 0.56  | 0.01 |
| 469 | FOXN3-AS1  | -1.21 | 0.00 |
| 470 | FOXO4      | -0.83 | 0.00 |
| 471 | FOXS1      | -1.07 | 0.00 |
| 472 | FSIP1      | 2.23  | 0.00 |
| 473 | FTL        | -1.13 | 0.00 |
| 474 | FUNDC2     | -0.57 | 0.00 |
| 475 | FUZ        | -1.11 | 0.00 |
| 476 | FXVD5      | -1.13 | 0.00 |
| 477 | G2E3       | 0.75  | 0.00 |
| 478 | G6PC3      | -1.59 | 0.00 |
| 479 | GABARAP    | -1.02 | 0.00 |
| 480 | GADD45A    | -1.01 | 0.01 |
| 481 | GADD45G    | -1.18 | 0.00 |
| 482 | GADD45GIP1 | -1.38 | 0.00 |
| 483 | GALT       | -0.79 | 0.01 |
| 484 | GAMT       | -1.06 | 0.00 |
| 485 | GAREM1     | 0.87  | 0.00 |
| 486 | GATAD2A    | -0.57 | 0.00 |
| 487 | GBP2       | -0.87 | 0.00 |
| 488 | GBP3       | -0.63 | 0.00 |
| 489 | GCSAML     | 0.65  | 0.00 |
| 490 | GDI1       | -0.77 | 0.00 |
| 491 | GET3       | -1.04 | 0.00 |
| 492 | GFER       | -0.69 | 0.01 |
| 493 | GFM1       | 0.58  | 0.01 |
| 494 | GGT5       | -0.92 | 0.00 |
| 495 | GGT6       | -1.13 | 0.00 |
| 496 | GGTA1P     | -0.92 | 0.00 |
| 497 | GIMAP1     | -0.97 | 0.00 |

|     |             |       |      |
|-----|-------------|-------|------|
| 498 | GJA4        | -1.21 | 0.00 |
| 499 | GLMP        | -0.68 | 0.00 |
| 500 | GLT8D1      | -0.46 | 0.00 |
| 501 | GLYATL2     | 2.65  | 0.00 |
| 502 | GMCL1       | 0.58  | 0.00 |
| 503 | GMDS        | 0.63  | 0.01 |
| 504 | GMPR2       | -0.61 | 0.00 |
| 505 | GNPTAB      | 0.63  | 0.00 |
| 506 | GNPTG       | -0.44 | 0.01 |
| 507 | GOLGA8S     | 1.19  | 0.01 |
| 508 | GOLM1       | -0.72 | 0.00 |
| 509 | GON7        | -0.67 | 0.00 |
| 510 | GON7        | -0.67 | 0.00 |
| 511 | GORASP1     | -0.76 | 0.00 |
| 512 | GPBAR1      | -1.17 | 0.01 |
| 513 | GPIHBP1     | -1.96 | 0.00 |
| 514 | GPKOW       | -0.67 | 0.00 |
| 515 | GPN2        | -1.13 | 0.00 |
| 516 | GPR108      | -0.54 | 0.01 |
| 517 | GPR143      | -1.62 | 0.00 |
| 518 | GPR151      | -1.22 | 0.00 |
| 519 | GPR21       | 0.47  | 0.00 |
| 520 | GPR22       | 1.04  | 0.00 |
| 521 | GPR22       | 0.96  | 0.00 |
| 522 | GPR55       | -1.74 | 0.00 |
| 523 | GPR61       | -0.96 | 0.00 |
| 524 | GPS2        | -0.74 | 0.00 |
| 525 | GPSM3       | -2.51 | 0.00 |
| 526 | GPSM3       | -2.51 | 0.00 |
| 527 | GPSM3       | -2.51 | 0.00 |
| 528 | GPSM3       | -2.51 | 0.00 |
| 529 | GPSM3       | -2.51 | 0.00 |
| 530 | GPSM3       | -2.51 | 0.00 |
| 531 | GPX4        | -0.77 | 0.01 |
| 532 | GRAMD1C     | 0.91  | 0.00 |
| 533 | GRHL3       | -1.57 | 0.01 |
| 534 | GRIA2       | -1.84 | 0.00 |
| 535 | GRK5        | -0.98 | 0.00 |
| 536 | GRN         | -0.77 | 0.01 |
| 537 | GS1-124K5.4 | -1.04 | 0.01 |
| 538 | GSDMD       | -0.79 | 0.00 |
| 539 | GSDMD       | -0.79 | 0.00 |
| 540 | GSTM4       | -1.08 | 0.00 |
| 541 | GTF2F1      | -0.56 | 0.01 |
| 542 | GTF2I       | 0.59  | 0.00 |
| 543 | GTF3C5      | -0.76 | 0.01 |
| 544 | GTPBP6      | -0.84 | 0.00 |
| 545 | H1-0        | -0.98 | 0.01 |
| 546 | H19         | -1.16 | 0.00 |
| 547 | HARS1       | -0.42 | 0.00 |

|     |            |        |      |
|-----|------------|--------|------|
| 548 | HAUS5      | -0.88  | 0.00 |
| 549 | HBA1       | -2.15  | 0.00 |
| 550 | HBA2       | -2.78  | 0.00 |
| 551 | HCFC1R1    | -1.73  | 0.00 |
| 552 | HCST       | -1.42  | 0.00 |
| 553 | HDAC11     | -1.27  | 0.00 |
| 554 | HDAC11-AS1 | -2.19  | 0.00 |
| 555 | HDAC4-AS1  | -1.49  | 0.00 |
| 556 | HDAC6      | -0.40  | 0.00 |
| 557 | HDAC7      | -0.51  | 0.00 |
| 558 | HDDC3      | -1.04  | 0.00 |
| 559 | HEATR5B    | 0.44   | 0.00 |
| 560 | HECTD1     | 0.64   | 0.01 |
| 561 | HEMK1      | -0.72  | 0.00 |
| 562 | HEXA-AS1   | -0.74  | 0.00 |
| 563 | HEXIM1     | -0.91  | 0.00 |
| 564 | HEXIM2     | -0.89  | 0.00 |
| 565 | HHEX       | -1.09  | 0.00 |
| 566 | HIBCH      | 0.56   | 0.00 |
| 567 | HIGD1B     | -1.15  | 0.00 |
| 568 | HIGD2A     | -1.26  | 0.00 |
| 569 | HINT2      | -1.24  | 0.00 |
| 570 | HIPK1-AS1  | -0.99  | 0.00 |
| 571 | HIRIP3     | -0.58  | 0.00 |
| 572 | HLA-A      | -1.91  | 0.01 |
| 573 | HLA-A      | -2.23  | 0.01 |
| 574 | HLA-A      | -2.23  | 0.01 |
| 575 | HLA-A      | -3.41  | 0.00 |
| 576 | HLA-C      | -3.53  | 0.00 |
| 577 | HLA-DMA    | -1.28  | 0.00 |
| 578 | HLA-DMA    | -1.28  | 0.00 |
| 579 | HLA-DMA    | -1.27  | 0.00 |
| 580 | HLA-DMA    | -1.27  | 0.00 |
| 581 | HLA-DMA    | -1.28  | 0.00 |
| 582 | HLA-DPA1   | -1.83  | 0.01 |
| 583 | HLA-DPA1   | -1.82  | 0.00 |
| 584 | HLA-DPA1   | -1.73  | 0.00 |
| 585 | HLA-DPA1   | -1.83  | 0.01 |
| 586 | HLA-DPB2   | 0.87   | 0.00 |
| 587 | HLA-DPB2   | 0.87   | 0.00 |
| 588 | HLA-DQA1   | -10.62 | 0.00 |
| 589 | HLA-DRA    | -4.64  | 0.00 |
| 590 | HLA-DRB1   | -7.02  | 0.00 |
| 591 | HLA-L      | -1.69  | 0.01 |
| 592 | HNF1B      | 1.36   | 0.00 |
| 593 | HOXA10-AS  | -1.87  | 0.00 |
| 594 | HOXA7      | -1.48  | 0.01 |
| 595 | HOXA9      | -1.35  | 0.00 |
| 596 | HOXA-AS3   | -2.19  | 0.00 |
| 597 | HSD17B8    | -1.02  | 0.01 |

|     |          |       |      |
|-----|----------|-------|------|
| 598 | HSD17B8  | -1.02 | 0.01 |
| 599 | HSD17B8  | -1.02 | 0.01 |
| 600 | HSD17B8  | -1.02 | 0.01 |
| 601 | HSD17B8  | -1.02 | 0.01 |
| 602 | HSD17B8  | -1.02 | 0.01 |
| 603 | HSPB8    | -2.31 | 0.00 |
| 604 | HSPBP1   | -0.80 | 0.00 |
| 605 | HTRA2    | -0.62 | 0.00 |
| 606 | HVCN1    | -0.60 | 0.00 |
| 607 | HYAL3    | -1.01 | 0.00 |
| 608 | HYLS1    | -0.56 | 0.01 |
| 609 | IBA57-DT | -1.25 | 0.00 |
| 610 | IFI27L2  | -1.54 | 0.00 |
| 611 | IFI27L2  | -1.54 | 0.00 |
| 612 | IFITM1   | -1.43 | 0.00 |
| 613 | IFITM2   | -2.21 | 0.00 |
| 614 | IFITM3   | -1.65 | 0.00 |
| 615 | IGBP1    | -0.47 | 0.01 |
| 616 | IGFBP6   | -1.44 | 0.00 |
| 617 | IGFBP7   | -0.88 | 0.00 |
| 618 | IGSF21   | -1.55 | 0.00 |
| 619 | IL20     | -2.75 | 0.00 |
| 620 | ILF3-DT  | -0.83 | 0.00 |
| 621 | IMP4     | -0.68 | 0.00 |
| 622 | IMPDH2   | -0.87 | 0.00 |
| 623 | INAFM1   | -1.76 | 0.00 |
| 624 | INCA1    | -1.03 | 0.00 |
| 625 | INKA1    | -0.90 | 0.00 |
| 626 | INO80    | 0.44  | 0.00 |
| 627 | INO80B   | -0.90 | 0.00 |
| 628 | INSM1    | -2.62 | 0.01 |
| 629 | INTS11   | -0.73 | 0.00 |
| 630 | IPO13    | -0.74 | 0.00 |
| 631 | IQCC     | -0.73 | 0.01 |
| 632 | IQCF3    | 0.67  | 0.00 |
| 633 | IREB2    | 0.44  | 0.00 |
| 634 | IRF2BP1  | -0.96 | 0.00 |
| 635 | IRF3     | -0.68 | 0.00 |
| 636 | IRS1     | -1.10 | 0.01 |
| 637 | IRX1     | -2.05 | 0.00 |
| 638 | ISCA2    | -0.56 | 0.01 |
| 639 | ISCU     | -0.66 | 0.00 |
| 640 | ISG20L2  | -0.46 | 0.00 |
| 641 | ISLR     | -1.04 | 0.00 |
| 642 | ISOC2    | -0.86 | 0.01 |
| 643 | ITGA3    | -1.48 | 0.00 |
| 644 | ITPK1    | -0.67 | 0.00 |
| 645 | ITPK1    | -0.67 | 0.00 |
| 646 | JADE2    | -0.86 | 0.01 |
| 647 | JMJD8    | -0.90 | 0.00 |

|     |            |       |      |
|-----|------------|-------|------|
| 648 | JOSD2      | -1.21 | 0.00 |
| 649 | KAAG1      | -3.32 | 0.00 |
| 650 | KANK2      | -0.57 | 0.01 |
| 651 | KANSL1L    | 0.60  | 0.01 |
| 652 | KAT5       | -0.63 | 0.00 |
| 653 | KCNF1      | -4.32 | 0.00 |
| 654 | KCNH2      | -2.05 | 0.00 |
| 655 | KCNIP4-IT1 | 0.61  | 0.00 |
| 656 | KCNJ8      | -0.73 | 0.00 |
| 657 | KCNK15     | -1.97 | 0.00 |
| 658 | KCNT1      | 1.86  | 0.00 |
| 659 | KCTD11     | -0.89 | 0.00 |
| 660 | KCTD2      | -0.68 | 0.00 |
| 661 | KCTD21     | -0.52 | 0.00 |
| 662 | KCTD4      | 0.88  | 0.00 |
| 663 | KDF1       | -0.82 | 0.00 |
| 664 | KEAP1      | -0.63 | 0.00 |
| 665 | KIF12      | -2.32 | 0.00 |
| 666 | KIF1B      | 0.50  | 0.00 |
| 667 | KL         | -1.33 | 0.00 |
| 668 | KLHDC4     | 0.54  | 0.00 |
| 669 | KRI1       | -0.75 | 0.00 |
| 670 | KRTCAP2    | -1.00 | 0.00 |
| 671 | KXD1       | -0.57 | 0.00 |
| 672 | LACTB2-AS1 | 0.59  | 0.00 |
| 673 | LAMB2      | -1.31 | 0.00 |
| 674 | LAMTOR1    | -0.69 | 0.00 |
| 675 | LAMTOR2    | -0.90 | 0.00 |
| 676 | LAMTOR4    | -1.06 | 0.00 |
| 677 | LAMTOR5    | -0.74 | 0.00 |
| 678 | LAS1L      | -0.59 | 0.00 |
| 679 | LCMT2      | -0.97 | 0.00 |
| 680 | LDB1       | -0.85 | 0.00 |
| 681 | LDLRAP1    | -0.84 | 0.00 |
| 682 | LEAP2      | -0.78 | 0.00 |
| 683 | LENG1      | -1.57 | 0.00 |
| 684 | LHFPL3-AS2 | 0.74  | 0.01 |
| 685 | LHFPL6     | -0.74 | 0.00 |
| 686 | LIMD2      | -1.20 | 0.00 |
| 687 | LIMS1-AS1  | 0.66  | 0.01 |
| 688 | LINC00216  | 0.73  | 0.00 |
| 689 | LINC00271  | 0.68  | 0.00 |
| 690 | LINC00276  | 0.47  | 0.01 |
| 691 | LINC00298  | 0.99  | 0.00 |
| 692 | LINC00324  | -1.59 | 0.00 |
| 693 | LINC00461  | 1.36  | 0.00 |
| 694 | LINC00536  | -1.43 | 0.01 |
| 695 | LINC00566  | 0.87  | 0.00 |
| 696 | LINC00635  | 0.45  | 0.00 |
| 697 | LINC00667  | -0.52 | 0.00 |

|     |              |       |      |
|-----|--------------|-------|------|
| 698 | LINC00836    | 0.73  | 0.00 |
| 699 | LINC00907    | 0.77  | 0.00 |
| 700 | LINC01016    | -1.57 | 0.00 |
| 701 | LINC01023    | -1.74 | 0.00 |
| 702 | LINC01124    | -1.79 | 0.01 |
| 703 | LINC01137    | -0.65 | 0.00 |
| 704 | LINC01144    | -1.26 | 0.00 |
| 705 | LINC01180    | 0.69  | 0.01 |
| 706 | LINC01209    | 1.49  | 0.01 |
| 707 | LINC01427    | 0.62  | 0.01 |
| 708 | LINC01586    | 0.68  | 0.01 |
| 709 | LINC01609    | 0.65  | 0.00 |
| 710 | LINC01684    | 0.53  | 0.01 |
| 711 | LINC01697    | 0.67  | 0.00 |
| 712 | LINC01722    | 0.60  | 0.00 |
| 713 | LINC01748    | 0.46  | 0.01 |
| 714 | LINC01776    | 0.59  | 0.00 |
| 715 | LINC01793    | 0.98  | 0.00 |
| 716 | LINC01852    | -0.80 | 0.00 |
| 717 | LINC01864    | 0.60  | 0.01 |
| 718 | LINC02055    | 2.05  | 0.00 |
| 719 | LINC02225    | 0.42  | 0.00 |
| 720 | LINC02261    | 0.85  | 0.00 |
| 721 | LINC02274    | 0.61  | 0.00 |
| 722 | LINC02275    | 0.52  | 0.00 |
| 723 | LINC02361    | -1.14 | 0.00 |
| 724 | LINC02728    | 0.68  | 0.00 |
| 725 | LINC02731    | -0.90 | 0.00 |
| 726 | LIX1L-AS1    | -0.55 | 0.00 |
| 727 | LMBR1        | 0.87  | 0.00 |
| 728 | LMO2         | -0.63 | 0.00 |
| 729 | LOC100129484 | -0.78 | 0.01 |
| 730 | LOC100131315 | 1.75  | 0.00 |
| 731 | LOC100287042 | -0.96 | 0.00 |
| 732 | LOC100287837 | -1.63 | 0.00 |
| 733 | LOC100289361 | -1.63 | 0.00 |
| 734 | LOC100505915 | 0.73  | 0.00 |
| 735 | LOC100506289 | -2.27 | 0.00 |
| 736 | LOC100506688 | 0.69  | 0.00 |
| 737 | LOC100507564 | -1.31 | 0.00 |
| 738 | LOC100507642 | -1.98 | 0.00 |
| 739 | LOC100996419 | -0.93 | 0.01 |
| 740 | LOC100996842 | -1.19 | 0.00 |
| 741 | LOC101927051 | -1.14 | 0.00 |
| 742 | LOC101927124 | 0.88  | 0.00 |
| 743 | LOC101927136 | 0.60  | 0.00 |
| 744 | LOC101927151 | -0.58 | 0.00 |
| 745 | LOC101927179 | 0.93  | 0.00 |
| 746 | LOC101927420 | -1.33 | 0.00 |
| 747 | LOC101927752 | -0.68 | 0.00 |



|     |              |       |      |
|-----|--------------|-------|------|
| 748 | LOC101927974 | -0.84 | 0.00 |
| 749 | LOC101928069 | -0.81 | 0.00 |
| 750 | LOC101928336 | 0.49  | 0.01 |
| 751 | LOC101928696 | 1.42  | 0.00 |
| 752 | LOC101928728 | -1.67 | 0.00 |
| 753 | LOC101928731 | 0.88  | 0.00 |
| 754 | LOC101928896 | 0.72  | 0.00 |
| 755 | LOC101929054 | -1.54 | 0.00 |
| 756 | LOC101929243 | -1.95 | 0.00 |
| 757 | LOC101929331 | -1.50 | 0.00 |
| 758 | LOC101929709 | 0.80  | 0.00 |
| 759 | LOC102546299 | 0.61  | 0.00 |
| 760 | LOC102723407 | -3.14 | 0.00 |
| 761 | LOC102724889 | -0.85 | 0.00 |
| 762 | LOC105274304 | -1.04 | 0.00 |
| 763 | LOC105369306 | 0.59  | 0.00 |
| 764 | LOC105369779 | -1.07 | 0.00 |
| 765 | LOC105370473 | 0.58  | 0.00 |
| 766 | LOC105370792 | -1.05 | 0.01 |
| 767 | LOC105371414 | 0.65  | 0.00 |
| 768 | LOC105371795 | -1.72 | 0.00 |
| 769 | LOC105372069 | 0.93  | 0.00 |
| 770 | LOC105373347 | 0.65  | 0.01 |
| 771 | LOC105373383 | -1.45 | 0.00 |
| 772 | LOC107984660 | -1.00 | 0.01 |
| 773 | LOC107985433 | 1.21  | 0.01 |
| 774 | LOC108783654 | -1.13 | 0.00 |
| 775 | LOC112267983 | -0.73 | 0.01 |
| 776 | LOC153684    | -0.64 | 0.00 |
| 777 | LOC642361    | -0.88 | 0.00 |
| 778 | LOC644656    | -0.87 | 0.00 |
| 779 | LOC648987    | -0.53 | 0.00 |
| 780 | LOC651337    | 0.68  | 0.00 |
| 781 | LOC730098    | -1.71 | 0.00 |
| 782 | LOC731157    | -1.48 | 0.00 |
| 783 | LOXL3        | -0.71 | 0.01 |
| 784 | LRCH3        | 0.67  | 0.00 |
| 785 | LRR32        | -0.79 | 0.01 |
| 786 | LRR37A3      | 0.84  | 0.00 |
| 787 | LRR47        | -0.62 | 0.00 |
| 788 | LRR69        | 0.77  | 0.00 |
| 789 | LRRN2        | -1.42 | 0.00 |
| 790 | LRRM2        | 1.01  | 0.00 |
| 791 | LSM4         | -0.85 | 0.00 |
| 792 | LSM6         | -0.46 | 0.00 |
| 793 | LSM7         | -1.12 | 0.00 |
| 794 | LSMEM1       | 1.23  | 0.00 |
| 795 | LSP1         | -0.79 | 0.00 |
| 796 | LSS          | 1.05  | 0.00 |
| 797 | LTB          | -1.13 | 0.00 |

|     |              |       |      |
|-----|--------------|-------|------|
| 798 | LTN1         | 0.43  | 0.00 |
| 799 | LUC7L        | 0.59  | 0.00 |
| 800 | LYPD6        | -1.41 | 0.01 |
| 801 | LZTS2        | -0.76 | 0.00 |
| 802 | MAEL         | -2.15 | 0.00 |
| 803 | MAFG-DT      | -1.60 | 0.00 |
| 804 | MAGEA1       | 4.13  | 0.00 |
| 805 | MAP1A        | -0.63 | 0.00 |
| 806 | MAP1LC3A     | -0.93 | 0.00 |
| 807 | MAP3K12      | -0.99 | 0.00 |
| 808 | MAPK3        | -0.94 | 0.00 |
| 809 | MAPKAPK5-AS1 | -0.52 | 0.00 |
| 810 | MAX          | -0.62 | 0.00 |
| 811 | MBD3         | -0.93 | 0.00 |
| 812 | MBOAT7       | -1.37 | 0.01 |
| 813 | MCM3         | -0.75 | 0.01 |
| 814 | MCRIP1       | -0.88 | 0.01 |
| 815 | MEA1         | -1.08 | 0.00 |
| 816 | MED11        | -0.90 | 0.00 |
| 817 | MED14        | 0.31  | 0.00 |
| 818 | MED18        | -0.66 | 0.00 |
| 819 | MED19        | -1.08 | 0.00 |
| 820 | MED22        | -0.45 | 0.01 |
| 821 | MED22        | -0.45 | 0.01 |
| 822 | MED29        | -0.62 | 0.01 |
| 823 | MEIS3        | -0.90 | 0.00 |
| 824 | MEOX1        | -1.67 | 0.00 |
| 825 | MEPCE        | -0.81 | 0.00 |
| 826 | MESD         | -0.42 | 0.01 |
| 827 | METTL1       | -0.89 | 0.00 |
| 828 | MFAP4        | -1.44 | 0.00 |
| 829 | MFN1         | 0.58  | 0.00 |
| 830 | MGC16275     | -0.81 | 0.00 |
| 831 | MICB         | -1.45 | 0.01 |
| 832 | MICB         | -1.45 | 0.01 |
| 833 | MICOS13      | -1.41 | 0.00 |
| 834 | MIF4GD       | -0.95 | 0.00 |
| 835 | MINCR        | -1.70 | 0.00 |
| 836 | MIR1299      | 1.14  | 0.00 |
| 837 | MIR133A1HG   | 0.90  | 0.00 |
| 838 | MIR199A2     | -1.79 | 0.00 |
| 839 | MIR200CHG    | -1.46 | 0.00 |
| 840 | MIR27B       | -1.36 | 0.00 |
| 841 | MIR3150BHG   | 1.88  | 0.00 |
| 842 | MIR3648-1    | 0.78  | 0.00 |
| 843 | MIR3648-2    | 0.78  | 0.00 |
| 844 | MIR4458HG    | -0.80 | 0.01 |
| 845 | MIR4742      | 1.09  | 0.00 |
| 846 | MIR4755      | 1.17  | 0.00 |
| 847 | MIR497HG     | -1.48 | 0.00 |

|     |            |       |      |
|-----|------------|-------|------|
| 848 | MIR548W    | 0.74  | 0.01 |
| 849 | MIR644A    | 1.28  | 0.00 |
| 850 | MIR663B    | 0.92  | 0.00 |
| 851 | MIR941-1   | 1.31  | 0.00 |
| 852 | MLLT11     | -0.79 | 0.00 |
| 853 | MLST8      | -0.66 | 0.00 |
| 854 | MMACHC     | -0.91 | 0.00 |
| 855 | MMADHC-DT  | -0.85 | 0.00 |
| 856 | MMP28      | -1.13 | 0.00 |
| 857 | MOAP1      | -0.79 | 0.00 |
| 858 | MOAP1      | -0.79 | 0.00 |
| 859 | MOB1B      | 0.44  | 0.01 |
| 860 | MOB3C      | -0.94 | 0.00 |
| 861 | MON1A      | -0.77 | 0.00 |
| 862 | MON2       | 0.70  | 0.01 |
| 863 | MORC3      | 0.43  | 0.00 |
| 864 | MORN3      | -1.03 | 0.00 |
| 865 | MPI        | -0.95 | 0.00 |
| 866 | MPRIP      | -0.52 | 0.01 |
| 867 | MPV17      | -0.61 | 0.00 |
| 868 | MRM2       | -0.97 | 0.00 |
| 869 | MRPL10     | -1.29 | 0.00 |
| 870 | MRPL16     | -0.59 | 0.00 |
| 871 | MRPL17     | -0.95 | 0.00 |
| 872 | MRPL20     | -0.69 | 0.00 |
| 873 | MRPL20-AS1 | -0.87 | 0.00 |
| 874 | MRPL24     | -0.83 | 0.00 |
| 875 | MRPL27     | -0.97 | 0.00 |
| 876 | MRPL34     | -0.83 | 0.00 |
| 877 | MRPL43     | -0.68 | 0.01 |
| 878 | MRPL49     | -0.73 | 0.00 |
| 879 | MRPL53     | -1.12 | 0.00 |
| 880 | MRPL55     | -0.99 | 0.00 |
| 881 | MRPL57     | -0.80 | 0.00 |
| 882 | MRPS18B    | -0.52 | 0.01 |
| 883 | MRPS18B    | -0.52 | 0.01 |
| 884 | MRPS18B    | -0.52 | 0.01 |
| 885 | MRPS18B    | -0.52 | 0.01 |
| 886 | MRPS18B    | -0.52 | 0.01 |
| 887 | MRPS18B    | -0.52 | 0.01 |
| 888 | MRPS2      | -0.98 | 0.00 |
| 889 | MRPS21     | -0.62 | 0.00 |
| 890 | MRPS26     | -0.92 | 0.00 |
| 891 | MRPS34     | -0.74 | 0.01 |
| 892 | MRT04      | -0.63 | 0.00 |
| 893 | MSH5       | -0.86 | 0.00 |
| 894 | MSL1       | -0.99 | 0.01 |
| 895 | MST1       | -1.18 | 0.00 |
| 896 | MT1L       | -1.99 | 0.00 |
| 897 | MT2A       | -1.39 | 0.00 |

|     |                 |       |      |
|-----|-----------------|-------|------|
| 898 | MTCP1           | -0.98 | 0.00 |
| 899 | MTFMT           | -0.50 | 0.01 |
| 900 | MTFP1           | -1.14 | 0.01 |
| 901 | MUC6            | -1.70 | 0.00 |
| 902 | MUSTN1          | -2.53 | 0.00 |
| 903 | MUTYH           | -0.50 | 0.01 |
| 904 | MVB12A          | -1.12 | 0.00 |
| 905 | MXD4            | -0.58 | 0.01 |
| 906 | MYL5            | -1.26 | 0.00 |
| 907 | MYL6B           | -1.18 | 0.00 |
| 908 | MYL9            | -1.08 | 0.00 |
| 909 | MYLK3           | 0.39  | 0.01 |
| 910 | MYO1D           | 0.63  | 0.00 |
| 911 | MYSM1           | 0.63  | 0.01 |
| 912 | MZF1-AS1        | -0.90 | 0.00 |
| 913 | ENSG00000116652 | 0.84  | 0.01 |
| 914 | ENSG00000139239 | -0.95 | 0.00 |
| 915 | ENSG00000168852 | 0.82  | 0.01 |
| 916 | ENSG00000174403 | 0.91  | 0.00 |
| 917 | ENSG00000176134 | 1.30  | 0.00 |
| 918 | ENSG00000176320 | 0.66  | 0.01 |
| 919 | ENSG00000176933 | -1.43 | 0.00 |
| 920 | ENSG00000178636 | 0.53  | 0.01 |
| 921 | ENSG00000179899 | -0.92 | 0.00 |
| 922 | ENSG00000179979 | 0.57  | 0.00 |
| 923 | ENSG00000182021 | 1.03  | 0.00 |
| 924 | ENSG00000189149 | 0.51  | 0.01 |
| 925 | ENSG00000197332 | 0.64  | 0.00 |
| 926 | ENSG00000197376 | 1.11  | 0.00 |
| 927 | ENSG00000200314 | 1.25  | 0.00 |
| 928 | ENSG00000200525 | 1.50  | 0.00 |
| 929 | ENSG00000200882 | 0.93  | 0.00 |
| 930 | ENSG00000201435 | 1.03  | 0.00 |
| 931 | ENSG00000202374 | 0.99  | 0.00 |
| 932 | ENSG00000202444 | 1.98  | 0.01 |
| 933 | ENSG00000204850 | -1.28 | 0.01 |
| 934 | ENSG00000205176 | 2.00  | 0.00 |
| 935 | ENSG00000205583 | 0.64  | 0.00 |
| 936 | ENSG00000205622 | 0.76  | 0.00 |
| 937 | ENSG00000206739 | 0.94  | 0.01 |
| 938 | ENSG00000209082 | 1.57  | 0.00 |
| 939 | ENSG00000210117 | 2.31  | 0.00 |
| 940 | ENSG00000210184 | 1.70  | 0.00 |
| 941 | ENSG00000210194 | 1.50  | 0.00 |
| 942 | ENSG00000210195 | 1.51  | 0.00 |
| 943 | ENSG00000211640 | -2.41 | 0.00 |
| 944 | ENSG00000211645 | -2.47 | 0.00 |
| 945 | ENSG00000211941 | -2.04 | 0.00 |
| 946 | ENSG00000211955 | -3.19 | 0.00 |
| 947 | ENSG00000212342 | 0.99  | 0.01 |

|     |                 |       |      |
|-----|-----------------|-------|------|
| 948 | ENSG00000213846 | -0.82 | 0.00 |
| 949 | ENSG00000214182 | -1.23 | 0.00 |
| 950 | ENSG00000214283 | 0.88  | 0.00 |
| 951 | ENSG00000214389 | 0.88  | 0.00 |
| 952 | ENSG00000214559 | 0.64  | 0.01 |
| 953 | ENSG00000216613 | 1.29  | 0.00 |
| 954 | ENSG00000217624 | 0.94  | 0.01 |
| 955 | ENSG00000217767 | 1.20  | 0.00 |
| 956 | ENSG00000217783 | 0.84  | 0.00 |
| 957 | ENSG00000218283 | 0.75  | 0.00 |
| 958 | ENSG00000218996 | 1.37  | 0.00 |
| 959 | ENSG00000219085 | 0.76  | 0.00 |
| 960 | ENSG00000219409 | 0.96  | 0.00 |
| 961 | ENSG00000220392 | 0.94  | 0.00 |
| 962 | ENSG00000221439 | 1.10  | 0.01 |
| 963 | ENSG00000223505 | 0.87  | 0.01 |
| 964 | ENSG00000223525 | 0.72  | 0.00 |
| 965 | ENSG00000223653 | 0.67  | 0.01 |
| 966 | ENSG00000223704 | 0.51  | 0.01 |
| 967 | ENSG00000223911 | 0.75  | 0.01 |
| 968 | ENSG00000224007 | 0.90  | 0.00 |
| 969 | ENSG00000224078 | 0.82  | 0.00 |
| 970 | ENSG00000224114 | 0.70  | 0.01 |
| 971 | ENSG00000224117 | 1.79  | 0.00 |
| 972 | ENSG00000224152 | -0.84 | 0.00 |
| 973 | ENSG00000224358 | -0.50 | 0.01 |
| 974 | ENSG00000224418 | -1.10 | 0.00 |
| 975 | ENSG00000224885 | 0.78  | 0.00 |
| 976 | ENSG00000224905 | 0.75  | 0.00 |
| 977 | ENSG00000224992 | -1.03 | 0.01 |
| 978 | ENSG00000225031 | -3.97 | 0.00 |
| 979 | ENSG00000225078 | 1.51  | 0.00 |
| 980 | ENSG00000225224 | 0.93  | 0.00 |
| 981 | ENSG00000225226 | 0.59  | 0.01 |
| 982 | ENSG00000225243 | 1.13  | 0.01 |
| 983 | ENSG00000225300 | 0.55  | 0.01 |
| 984 | ENSG00000225401 | -0.92 | 0.00 |
| 985 | ENSG00000225761 | 1.05  | 0.01 |
| 986 | ENSG00000225767 | 0.74  | 0.00 |
| 987 | ENSG00000225806 | -1.22 | 0.00 |
| 988 | ENSG00000225840 | -4.70 | 0.00 |
| 989 | ENSG00000225945 | -1.16 | 0.00 |
| 990 | ENSG00000226010 | 1.05  | 0.01 |
| 991 | ENSG00000226200 | -0.93 | 0.00 |
| 992 | ENSG00000226318 | 0.80  | 0.01 |
| 993 | ENSG00000226647 | 0.65  | 0.01 |
| 994 | ENSG00000226801 | 1.45  | 0.00 |
| 995 | ENSG00000226899 | 0.67  | 0.00 |
| 996 | ENSG00000226982 | 0.98  | 0.00 |
| 997 | ENSG00000227197 | 1.17  | 0.00 |

|      |                 |       |      |
|------|-----------------|-------|------|
| 998  | ENSG00000227227 | 0.79  | 0.00 |
| 999  | ENSG00000227267 | 1.24  | 0.01 |
| 1000 | ENSG00000227583 | 1.23  | 0.00 |
| 1001 | ENSG00000227606 | 1.24  | 0.00 |
| 1002 | ENSG00000227716 | 0.68  | 0.01 |
| 1003 | ENSG00000227896 | -0.67 | 0.00 |
| 1004 | ENSG00000227945 | 1.05  | 0.00 |
| 1005 | ENSG00000227946 | -0.86 | 0.00 |
| 1006 | ENSG00000228172 | -0.89 | 0.00 |
| 1007 | ENSG00000228343 | -0.74 | 0.00 |
| 1008 | ENSG00000228513 | 1.23  | 0.00 |
| 1009 | ENSG00000228540 | 1.10  | 0.00 |
| 1010 | ENSG00000228573 | 0.86  | 0.00 |
| 1011 | ENSG00000228728 | 0.89  | 0.00 |
| 1012 | ENSG00000229025 | 0.67  | 0.01 |
| 1013 | ENSG00000229048 | 0.96  | 0.00 |
| 1014 | ENSG00000229097 | 0.72  | 0.00 |
| 1015 | ENSG00000229273 | -1.51 | 0.00 |
| 1016 | ENSG00000229320 | -0.79 | 0.00 |
| 1017 | ENSG00000229325 | 0.93  | 0.00 |
| 1018 | ENSG00000229431 | -0.67 | 0.01 |
| 1019 | ENSG00000229502 | 0.72  | 0.00 |
| 1020 | ENSG00000229728 | 0.89  | 0.00 |
| 1021 | ENSG00000229800 | 0.83  | 0.00 |
| 1022 | ENSG00000229816 | 0.67  | 0.00 |
| 1023 | ENSG00000229839 | 1.06  | 0.00 |
| 1024 | ENSG00000230022 | 0.95  | 0.00 |
| 1025 | ENSG00000230046 | 0.86  | 0.00 |
| 1026 | ENSG00000230131 | 1.27  | 0.01 |
| 1027 | ENSG00000230433 | 1.00  | 0.01 |
| 1028 | ENSG00000230439 | -1.64 | 0.00 |
| 1029 | ENSG00000230516 | 0.52  | 0.00 |
| 1030 | ENSG00000230551 | 0.66  | 0.00 |
| 1031 | ENSG00000230572 | 1.09  | 0.00 |
| 1032 | ENSG00000230585 | 0.60  | 0.00 |
| 1033 | ENSG00000230612 | 0.43  | 0.01 |
| 1034 | ENSG00000230696 | 0.85  | 0.00 |
| 1035 | ENSG00000230715 | -1.35 | 0.01 |
| 1036 | ENSG00000230735 | 0.84  | 0.00 |
| 1037 | ENSG00000230894 | 0.64  | 0.00 |
| 1038 | ENSG00000231049 | 1.56  | 0.00 |
| 1039 | ENSG00000231050 | -1.40 | 0.00 |
| 1040 | ENSG00000231310 | 0.75  | 0.00 |
| 1041 | ENSG00000231588 | -2.39 | 0.00 |
| 1042 | ENSG00000231765 | 1.10  | 0.00 |
| 1043 | ENSG00000231770 | -0.63 | 0.01 |
| 1044 | ENSG00000231842 | 1.29  | 0.00 |
| 1045 | ENSG00000231952 | 0.85  | 0.00 |
| 1046 | ENSG00000232006 | 0.51  | 0.00 |
| 1047 | ENSG00000232216 | -3.07 | 0.00 |

|      |                 |       |      |
|------|-----------------|-------|------|
| 1048 | ENSG00000232504 | -1.14 | 0.00 |
| 1049 | ENSG00000232542 | 0.78  | 0.00 |
| 1050 | ENSG00000232554 | 1.07  | 0.00 |
| 1051 | ENSG00000232573 | -7.11 | 0.00 |
| 1052 | ENSG00000232754 | 0.90  | 0.01 |
| 1053 | ENSG00000232934 | 0.59  | 0.00 |
| 1054 | ENSG00000233044 | 0.74  | 0.00 |
| 1055 | ENSG00000233061 | 0.60  | 0.01 |
| 1056 | ENSG00000233072 | 1.05  | 0.00 |
| 1057 | ENSG00000233461 | -1.04 | 0.00 |
| 1058 | ENSG00000233646 | 1.76  | 0.00 |
| 1059 | ENSG00000233885 | 0.69  | 0.00 |
| 1060 | ENSG00000233998 | 0.90  | 0.00 |
| 1061 | ENSG00000234361 | 0.72  | 0.01 |
| 1062 | ENSG00000234378 | 0.69  | 0.01 |
| 1063 | ENSG00000234686 | 1.16  | 0.00 |
| 1064 | ENSG00000234694 | -1.19 | 0.00 |
| 1065 | ENSG00000234814 | 1.25  | 0.00 |
| 1066 | ENSG00000234818 | 0.98  | 0.00 |
| 1067 | ENSG00000234864 | 0.61  | 0.01 |
| 1068 | ENSG00000234917 | -1.04 | 0.00 |
| 1069 | ENSG00000234982 | 1.78  | 0.00 |
| 1070 | ENSG00000234995 | 0.99  | 0.01 |
| 1071 | ENSG00000235008 | 0.92  | 0.01 |
| 1072 | ENSG00000235298 | -0.81 | 0.00 |
| 1073 | ENSG00000235725 | 0.79  | 0.00 |
| 1074 | ENSG00000235833 | 0.96  | 0.00 |
| 1075 | ENSG00000235869 | 1.48  | 0.00 |
| 1076 | ENSG00000235978 | -1.43 | 0.01 |
| 1077 | ENSG00000236018 | 0.85  | 0.00 |
| 1078 | ENSG00000236184 | 0.59  | 0.01 |
| 1079 | ENSG00000236255 | 0.62  | 0.00 |
| 1080 | ENSG00000236397 | -1.89 | 0.00 |
| 1081 | ENSG00000236452 | -2.79 | 0.00 |
| 1082 | ENSG00000236526 | 0.86  | 0.00 |
| 1083 | ENSG00000236559 | 0.69  | 0.00 |
| 1084 | ENSG00000236673 | 0.54  | 0.00 |
| 1085 | ENSG00000236963 | 0.65  | 0.01 |
| 1086 | ENSG00000237181 | -1.16 | 0.00 |
| 1087 | ENSG00000237276 | -1.29 | 0.00 |
| 1088 | ENSG00000237317 | 1.25  | 0.00 |
| 1089 | ENSG00000237380 | -0.86 | 0.01 |
| 1090 | ENSG00000237406 | 0.81  | 0.00 |
| 1091 | ENSG00000237414 | 0.67  | 0.00 |
| 1092 | ENSG00000237442 | -3.09 | 0.00 |
| 1093 | ENSG00000237483 | 1.17  | 0.00 |
| 1094 | ENSG00000237529 | 0.78  | 0.01 |
| 1095 | ENSG00000237672 | 0.79  | 0.00 |
| 1096 | ENSG00000237689 | 1.10  | 0.00 |
| 1097 | ENSG00000237827 | 0.87  | 0.00 |

|      |                 |       |      |
|------|-----------------|-------|------|
| 1098 | ENSG00000237840 | -0.71 | 0.00 |
| 1099 | ENSG00000237950 | -1.25 | 0.00 |
| 1100 | ENSG00000237954 | 0.82  | 0.00 |
| 1101 | ENSG00000238045 | -0.58 | 0.00 |
| 1102 | ENSG00000238058 | -0.69 | 0.00 |
| 1103 | ENSG00000238164 | -1.19 | 0.00 |
| 1104 | ENSG00000238279 | -1.63 | 0.00 |
| 1105 | ENSG00000238290 | 0.56  | 0.00 |
| 1106 | ENSG00000239280 | 0.65  | 0.00 |
| 1107 | ENSG00000239300 | 0.79  | 0.00 |
| 1108 | ENSG00000239351 | 0.92  | 0.00 |
| 1109 | ENSG00000239835 | 0.80  | 0.00 |
| 1110 | ENSG00000240005 | -1.40 | 0.00 |
| 1111 | ENSG00000240074 | 1.11  | 0.00 |
| 1112 | ENSG00000240132 | 0.66  | 0.01 |
| 1113 | ENSG00000240342 | -1.02 | 0.00 |
| 1114 | ENSG00000241003 | 0.83  | 0.00 |
| 1115 | ENSG00000241007 | 1.13  | 0.00 |
| 1116 | ENSG00000241043 | 0.47  | 0.00 |
| 1117 | ENSG00000241112 | 0.70  | 0.01 |
| 1118 | ENSG00000241244 | -2.22 | 0.01 |
| 1119 | ENSG00000241280 | 2.20  | 0.01 |
| 1120 | ENSG00000241294 | -2.23 | 0.00 |
| 1121 | ENSG00000241438 | 0.96  | 0.00 |
| 1122 | ENSG00000241475 | 0.72  | 0.00 |
| 1123 | ENSG00000241593 | 1.13  | 0.00 |
| 1124 | ENSG00000241599 | 0.83  | 0.00 |
| 1125 | ENSG00000242154 | 1.13  | 0.00 |
| 1126 | ENSG00000243053 | 0.80  | 0.00 |
| 1127 | ENSG00000243368 | 1.17  | 0.00 |
| 1128 | ENSG00000243650 | -0.62 | 0.01 |
| 1129 | ENSG00000243797 | 0.68  | 0.01 |
| 1130 | ENSG00000244124 | 0.81  | 0.00 |
| 1131 | ENSG00000244239 | -2.00 | 0.00 |
| 1132 | ENSG00000244301 | 1.07  | 0.00 |
| 1133 | ENSG00000244378 | 0.64  | 0.01 |
| 1134 | ENSG00000244490 | 0.89  | 0.00 |
| 1135 | ENSG00000244575 | -2.07 | 0.00 |
| 1136 | ENSG00000245025 | -0.67 | 0.01 |
| 1137 | ENSG00000246851 | 0.80  | 0.00 |
| 1138 | ENSG00000247092 | -0.74 | 0.00 |
| 1139 | ENSG00000248240 | -0.86 | 0.00 |
| 1140 | ENSG00000248367 | -1.25 | 0.00 |
| 1141 | ENSG00000248458 | 0.55  | 0.01 |
| 1142 | ENSG00000248489 | -0.76 | 0.00 |
| 1143 | ENSG00000248553 | 1.39  | 0.01 |
| 1144 | ENSG00000249006 | 1.43  | 0.00 |
| 1145 | ENSG00000249028 | 0.71  | 0.00 |
| 1146 | ENSG00000249140 | 0.77  | 0.00 |
| 1147 | ENSG00000249316 | 0.70  | 0.00 |



|      |                 |       |      |
|------|-----------------|-------|------|
| 1148 | ENSG00000249439 | 0.95  | 0.00 |
| 1149 | ENSG00000249673 | -0.61 | 0.00 |
| 1150 | ENSG00000250017 | 0.44  | 0.01 |
| 1151 | ENSG00000250039 | 0.75  | 0.00 |
| 1152 | ENSG00000250222 | -1.77 | 0.00 |
| 1153 | ENSG00000250318 | -1.02 | 0.00 |
| 1154 | ENSG00000250371 | 1.04  | 0.01 |
| 1155 | ENSG00000250448 | 0.98  | 0.00 |
| 1156 | ENSG00000250509 | 0.67  | 0.00 |
| 1157 | ENSG00000250848 | 0.85  | 0.00 |
| 1158 | ENSG00000250853 | 1.02  | 0.00 |
| 1159 | ENSG00000250869 | 0.62  | 0.00 |
| 1160 | ENSG00000250979 | 1.31  | 0.00 |
| 1161 | ENSG00000251054 | 1.02  | 0.01 |
| 1162 | ENSG00000251079 | 0.71  | 0.00 |
| 1163 | ENSG00000251379 | 0.62  | 0.00 |
| 1164 | ENSG00000251388 | 0.96  | 0.01 |
| 1165 | ENSG00000252172 | 1.32  | 0.01 |
| 1166 | ENSG00000252269 | 1.28  | 0.00 |
| 1167 | ENSG00000253153 | 1.14  | 0.00 |
| 1168 | ENSG00000253167 | 0.68  | 0.00 |
| 1169 | ENSG00000253376 | 0.50  | 0.00 |
| 1170 | ENSG00000253503 | 0.76  | 0.00 |
| 1171 | ENSG00000253669 | -0.86 | 0.00 |
| 1172 | ENSG00000253720 | 0.79  | 0.00 |
| 1173 | ENSG00000253775 | 0.81  | 0.00 |
| 1174 | ENSG00000253859 | 0.55  | 0.01 |
| 1175 | ENSG00000253908 | 1.04  | 0.00 |
| 1176 | ENSG00000254840 | 2.53  | 0.00 |
| 1177 | ENSG00000254962 | 0.99  | 0.01 |
| 1178 | ENSG00000255135 | -0.69 | 0.00 |
| 1179 | ENSG00000255197 | -1.25 | 0.00 |
| 1180 | ENSG00000255224 | -0.98 | 0.00 |
| 1181 | ENSG00000255321 | 0.74  | 0.00 |
| 1182 | ENSG00000255328 | 0.73  | 0.00 |
| 1183 | ENSG00000255968 | 0.79  | 0.00 |
| 1184 | ENSG00000256056 | 0.81  | 0.01 |
| 1185 | ENSG00000256092 | -0.98 | 0.00 |
| 1186 | ENSG00000256274 | 0.76  | 0.00 |
| 1187 | ENSG00000256646 | -0.53 | 0.01 |
| 1188 | ENSG00000256667 | 0.56  | 0.00 |
| 1189 | ENSG00000256955 | 0.62  | 0.00 |
| 1190 | ENSG00000257151 | 1.13  | 0.00 |
| 1191 | ENSG00000257277 | 0.51  | 0.01 |
| 1192 | ENSG00000257298 | 0.60  | 0.01 |
| 1193 | ENSG00000257398 | 0.78  | 0.00 |
| 1194 | ENSG00000257557 | -0.59 | 0.00 |
| 1195 | ENSG00000257781 | 0.79  | 0.00 |
| 1196 | ENSG00000257954 | 1.11  | 0.00 |
| 1197 | ENSG00000258044 | 0.57  | 0.00 |

|      |                 |       |      |
|------|-----------------|-------|------|
| 1198 | ENSG00000258082 | -1.08 | 0.00 |
| 1199 | ENSG00000258178 | 1.09  | 0.00 |
| 1200 | ENSG00000258504 | -4.93 | 0.00 |
| 1201 | ENSG00000258526 | 0.66  | 0.01 |
| 1202 | ENSG00000258636 | 0.65  | 0.00 |
| 1203 | ENSG00000258670 | 0.54  | 0.00 |
| 1204 | ENSG00000258765 | 0.72  | 0.00 |
| 1205 | ENSG00000258813 | -1.08 | 0.00 |
| 1206 | ENSG00000258858 | -1.21 | 0.00 |
| 1207 | ENSG00000258957 | -0.87 | 0.00 |
| 1208 | ENSG00000259090 | 0.95  | 0.00 |
| 1209 | ENSG00000259094 | 1.80  | 0.00 |
| 1210 | ENSG00000259113 | 0.97  | 0.01 |
| 1211 | ENSG00000259165 | 0.76  | 0.00 |
| 1212 | ENSG00000259209 | 1.12  | 0.00 |
| 1213 | ENSG00000259271 | -2.02 | 0.01 |
| 1214 | ENSG00000259276 | 0.81  | 0.00 |
| 1215 | ENSG00000259294 | 1.07  | 0.00 |
| 1216 | ENSG00000259298 | 0.67  | 0.00 |
| 1217 | ENSG00000259319 | -1.38 | 0.00 |
| 1218 | ENSG00000259408 | 0.90  | 0.00 |
| 1219 | ENSG00000259505 | 0.79  | 0.01 |
| 1220 | ENSG00000259521 | 0.99  | 0.01 |
| 1221 | ENSG00000259616 | 0.62  | 0.01 |
| 1222 | ENSG00000259627 | -5.68 | 0.00 |
| 1223 | ENSG00000259642 | -0.74 | 0.00 |
| 1224 | ENSG00000259828 | 0.80  | 0.00 |
| 1225 | ENSG00000259866 | 0.77  | 0.00 |
| 1226 | ENSG00000259877 | -0.57 | 0.00 |
| 1227 | ENSG00000259915 | 0.82  | 0.00 |
| 1228 | ENSG00000259959 | 0.66  | 0.00 |
| 1229 | ENSG00000260018 | -1.60 | 0.01 |
| 1230 | ENSG00000260022 | 1.36  | 0.01 |
| 1231 | ENSG00000260025 | -2.69 | 0.00 |
| 1232 | ENSG00000260035 | -2.41 | 0.00 |
| 1233 | ENSG00000260060 | -0.78 | 0.00 |
| 1234 | ENSG00000260062 | 0.55  | 0.00 |
| 1235 | ENSG00000260141 | 1.12  | 0.00 |
| 1236 | ENSG00000260274 | -1.33 | 0.00 |
| 1237 | ENSG00000260350 | 1.23  | 0.00 |
| 1238 | ENSG00000260455 | 1.34  | 0.01 |
| 1239 | ENSG00000260505 | 0.94  | 0.00 |
| 1240 | ENSG00000260526 | -1.08 | 0.00 |
| 1241 | ENSG00000260572 | -1.07 | 0.00 |
| 1242 | ENSG00000260669 | -0.62 | 0.01 |
| 1243 | ENSG00000260708 | -1.36 | 0.00 |
| 1244 | ENSG00000260772 | -7.08 | 0.00 |
| 1245 | ENSG00000260796 | -0.72 | 0.00 |
| 1246 | ENSG00000260923 | 0.80  | 0.00 |
| 1247 | ENSG00000260924 | -1.28 | 0.00 |

|      |                 |       |      |
|------|-----------------|-------|------|
| 1248 | ENSG00000260975 | 0.83  | 0.00 |
| 1249 | ENSG00000260992 | -1.68 | 0.00 |
| 1250 | ENSG00000261019 | 0.82  | 0.01 |
| 1251 | ENSG00000261186 | -1.38 | 0.00 |
| 1252 | ENSG00000261188 | -1.24 | 0.00 |
| 1253 | ENSG00000261200 | 0.94  | 0.00 |
| 1254 | ENSG00000261220 | -1.47 | 0.00 |
| 1255 | ENSG00000261242 | -1.37 | 0.00 |
| 1256 | ENSG00000261293 | 0.85  | 0.01 |
| 1257 | ENSG00000261296 | 1.10  | 0.00 |
| 1258 | ENSG00000261334 | -1.24 | 0.01 |
| 1259 | ENSG00000261351 | -0.64 | 0.00 |
| 1260 | ENSG00000261360 | -1.05 | 0.00 |
| 1261 | ENSG00000261369 | 0.69  | 0.01 |
| 1262 | ENSG00000261441 | -1.94 | 0.00 |
| 1263 | ENSG00000261462 | 1.03  | 0.01 |
| 1264 | ENSG00000261490 | -0.75 | 0.00 |
| 1265 | ENSG00000261512 | -1.19 | 0.00 |
| 1266 | ENSG00000261528 | 0.60  | 0.01 |
| 1267 | ENSG00000261529 | 0.80  | 0.00 |
| 1268 | ENSG00000261574 | 0.99  | 0.00 |
| 1269 | ENSG00000261582 | -1.04 | 0.00 |
| 1270 | ENSG00000261642 | 0.73  | 0.00 |
| 1271 | ENSG00000261654 | 0.72  | 0.00 |
| 1272 | ENSG00000261763 | 0.56  | 0.00 |
| 1273 | ENSG00000261826 | 0.54  | 0.00 |
| 1274 | ENSG00000261868 | 0.94  | 0.01 |
| 1275 | ENSG00000262049 | -1.22 | 0.00 |
| 1276 | ENSG00000262529 | 0.95  | 0.01 |
| 1277 | ENSG00000262888 | 0.81  | 0.01 |
| 1278 | ENSG00000263083 | 0.76  | 0.00 |
| 1279 | ENSG00000263105 | -1.41 | 0.00 |
| 1280 | ENSG00000263412 | -0.97 | 0.00 |
| 1281 | ENSG00000263477 | 0.85  | 0.00 |
| 1282 | ENSG00000263826 | -0.88 | 0.01 |
| 1283 | ENSG00000263884 | -0.65 | 0.01 |
| 1284 | ENSG00000264151 | 0.59  | 0.00 |
| 1285 | ENSG00000264270 | 0.70  | 0.00 |
| 1286 | ENSG00000264707 | 0.59  | 0.01 |
| 1287 | ENSG00000264727 | 0.86  | 0.00 |
| 1288 | ENSG00000264772 | -0.87 | 0.00 |
| 1289 | ENSG00000265128 | 1.09  | 0.01 |
| 1290 | ENSG00000265136 | 1.60  | 0.00 |
| 1291 | ENSG00000265204 | 1.01  | 0.00 |
| 1292 | ENSG00000265205 | 0.59  | 0.01 |
| 1293 | ENSG00000265206 | -1.42 | 0.00 |
| 1294 | ENSG00000265451 | 0.93  | 0.01 |
| 1295 | ENSG00000265713 | 0.91  | 0.00 |
| 1296 | ENSG00000265908 | 0.69  | 0.00 |
| 1297 | ENSG00000266208 | -1.45 | 0.00 |

|      |                 |       |      |
|------|-----------------|-------|------|
| 1298 | ENSG00000266274 | -1.04 | 0.00 |
| 1299 | ENSG00000266579 | 1.03  | 0.00 |
| 1300 | ENSG00000266696 | 1.05  | 0.00 |
| 1301 | ENSG00000266985 | 0.54  | 0.01 |
| 1302 | ENSG00000267006 | 0.89  | 0.00 |
| 1303 | ENSG00000267009 | 0.57  | 0.00 |
| 1304 | ENSG00000267239 | 0.77  | 0.00 |
| 1305 | ENSG00000267285 | 0.85  | 0.01 |
| 1306 | ENSG00000267457 | 0.92  | 0.00 |
| 1307 | ENSG00000267462 | 0.53  | 0.00 |
| 1308 | ENSG00000267469 | -5.58 | 0.00 |
| 1309 | ENSG00000267493 | -1.15 | 0.00 |
| 1310 | ENSG00000267560 | 0.69  | 0.01 |
| 1311 | ENSG00000268058 | 0.99  | 0.00 |
| 1312 | ENSG00000268163 | 1.17  | 0.00 |
| 1313 | ENSG00000268218 | 0.61  | 0.00 |
| 1314 | ENSG00000268366 | -1.16 | 0.00 |
| 1315 | ENSG00000268628 | -0.85 | 0.00 |
| 1316 | ENSG00000268736 | 1.32  | 0.01 |
| 1317 | ENSG00000269176 | -1.11 | 0.00 |
| 1318 | ENSG00000269189 | 1.06  | 0.01 |
| 1319 | ENSG00000269242 | -2.20 | 0.00 |
| 1320 | ENSG00000269243 | -2.54 | 0.00 |
| 1321 | ENSG00000269486 | 0.53  | 0.00 |
| 1322 | ENSG00000269560 | 0.61  | 0.00 |
| 1323 | ENSG00000269570 | 0.68  | 0.00 |
| 1324 | ENSG00000269842 | 0.86  | 0.00 |
| 1325 | ENSG00000269929 | 0.65  | 0.01 |
| 1326 | ENSG00000269952 | 1.19  | 0.01 |
| 1327 | ENSG00000269974 | 1.23  | 0.00 |
| 1328 | ENSG00000270012 | -0.65 | 0.00 |
| 1329 | ENSG00000270099 | 1.10  | 0.00 |
| 1330 | ENSG00000270112 | 1.36  | 0.00 |
| 1331 | ENSG00000270116 | 0.74  | 0.00 |
| 1332 | ENSG00000270175 | -1.33 | 0.00 |
| 1333 | ENSG00000270177 | -1.53 | 0.00 |
| 1334 | ENSG00000270269 | 1.11  | 0.00 |
| 1335 | ENSG00000270554 | 1.08  | 0.00 |
| 1336 | ENSG00000270585 | 0.69  | 0.01 |
| 1337 | ENSG00000270640 | 1.19  | 0.01 |
| 1338 | ENSG00000270832 | 1.14  | 0.00 |
| 1339 | ENSG00000270906 | 1.23  | 0.00 |
| 1340 | ENSG00000270964 | -1.02 | 0.00 |
| 1341 | ENSG00000271172 | 0.84  | 0.01 |
| 1342 | ENSG00000271324 | -1.51 | 0.00 |
| 1343 | ENSG00000271533 | 0.76  | 0.00 |
| 1344 | ENSG00000271643 | -1.04 | 0.00 |
| 1345 | ENSG00000271737 | -1.09 | 0.00 |
| 1346 | ENSG00000271780 | -0.88 | 0.00 |
| 1347 | ENSG00000271797 | -1.22 | 0.00 |

|      |                 |       |      |
|------|-----------------|-------|------|
| 1348 | ENSG00000271806 | 0.64  | 0.00 |
| 1349 | ENSG00000271918 | -1.09 | 0.00 |
| 1350 | ENSG00000271991 | -1.57 | 0.00 |
| 1351 | ENSG00000272054 | 0.47  | 0.00 |
| 1352 | ENSG00000272092 | -1.23 | 0.00 |
| 1353 | ENSG00000272183 | -0.97 | 0.01 |
| 1354 | ENSG00000272277 | -0.98 | 0.01 |
| 1355 | ENSG00000272417 | 1.20  | 0.00 |
| 1356 | ENSG00000272449 | -1.47 | 0.00 |
| 1357 | ENSG00000272472 | 1.00  | 0.01 |
| 1358 | ENSG00000272486 | 0.81  | 0.00 |
| 1359 | ENSG00000272525 | -1.46 | 0.00 |
| 1360 | ENSG00000272572 | -0.97 | 0.00 |
| 1361 | ENSG00000272604 | 0.62  | 0.00 |
| 1362 | ENSG00000272654 | -0.85 | 0.00 |
| 1363 | ENSG00000272663 | -1.57 | 0.00 |
| 1364 | ENSG00000272667 | -1.22 | 0.00 |
| 1365 | ENSG00000272800 | 0.72  | 0.01 |
| 1366 | ENSG00000272829 | -2.10 | 0.00 |
| 1367 | ENSG00000272831 | -1.06 | 0.00 |
| 1368 | ENSG00000272941 | -0.70 | 0.00 |
| 1369 | ENSG00000272953 | -1.60 | 0.00 |
| 1370 | ENSG00000272983 | 0.73  | 0.00 |
| 1371 | ENSG00000273026 | -1.03 | 0.00 |
| 1372 | ENSG00000273080 | -1.26 | 0.00 |
| 1373 | ENSG00000273139 | -1.11 | 0.00 |
| 1374 | ENSG00000273148 | -0.72 | 0.00 |
| 1375 | ENSG00000273175 | -1.54 | 0.00 |
| 1376 | ENSG00000273275 | 1.04  | 0.00 |
| 1377 | ENSG00000273365 | 0.82  | 0.01 |
| 1378 | ENSG00000273399 | 0.92  | 0.01 |
| 1379 | ENSG00000273420 | -1.76 | 0.00 |
| 1380 | ENSG00000273456 | -1.79 | 0.00 |
| 1381 | ENSG00000273702 | -1.09 | 0.00 |
| 1382 | ENSG00000274064 | 0.83  | 0.00 |
| 1383 | ENSG00000274093 | 1.17  | 0.00 |
| 1384 | ENSG00000274104 | -1.06 | 0.00 |
| 1385 | ENSG00000274162 | 0.91  | 0.00 |
| 1386 | ENSG00000274281 | 0.57  | 0.00 |
| 1387 | ENSG00000274364 | 0.86  | 0.01 |
| 1388 | ENSG00000274497 | -1.89 | 0.01 |
| 1389 | ENSG00000274536 | -0.97 | 0.00 |
| 1390 | ENSG00000274615 | 1.32  | 0.00 |
| 1391 | ENSG00000274627 | 0.48  | 0.01 |
| 1392 | ENSG00000274776 | 0.84  | 0.00 |
| 1393 | ENSG00000274827 | 0.99  | 0.01 |
| 1394 | ENSG00000275029 | 1.52  | 0.00 |
| 1395 | ENSG00000275197 | 0.85  | 0.01 |
| 1396 | ENSG00000275413 | 0.68  | 0.00 |
| 1397 | ENSG00000275426 | 1.16  | 0.00 |

|      |                 |       |      |
|------|-----------------|-------|------|
| 1398 | ENSG00000275441 | -1.72 | 0.00 |
| 1399 | ENSG00000275454 | -1.23 | 0.00 |
| 1400 | ENSG00000275488 | 0.77  | 0.00 |
| 1401 | ENSG00000275494 | -1.13 | 0.01 |
| 1402 | ENSG00000275512 | 0.51  | 0.00 |
| 1403 | ENSG00000276032 | 2.05  | 0.00 |
| 1404 | ENSG00000276107 | 1.27  | 0.00 |
| 1405 | ENSG00000276116 | -1.29 | 0.00 |
| 1406 | ENSG00000276223 | -2.22 | 0.00 |
| 1407 | ENSG00000276272 | 0.46  | 0.00 |
| 1408 | ENSG00000276282 | 0.90  | 0.00 |
| 1409 | ENSG00000276434 | 1.18  | 0.00 |
| 1410 | ENSG00000276517 | 0.62  | 0.00 |
| 1411 | ENSG00000276564 | 0.86  | 0.00 |
| 1412 | ENSG00000276724 | 0.68  | 0.01 |
| 1413 | ENSG00000276728 | -1.25 | 0.00 |
| 1414 | ENSG00000276744 | -1.13 | 0.00 |
| 1415 | ENSG00000276791 | -0.97 | 0.00 |
| 1416 | ENSG00000276809 | 0.74  | 0.00 |
| 1417 | ENSG00000276849 | -1.52 | 0.00 |
| 1418 | ENSG00000277130 | 0.68  | 0.00 |
| 1419 | ENSG00000277151 | 0.65  | 0.01 |
| 1420 | ENSG00000277283 | -0.88 | 0.00 |
| 1421 | ENSG00000277297 | 0.75  | 0.00 |
| 1422 | ENSG00000277369 | -0.94 | 0.00 |
| 1423 | ENSG00000277493 | 0.73  | 0.01 |
| 1424 | ENSG00000277619 | -2.86 | 0.00 |
| 1425 | ENSG00000277687 | 0.70  | 0.01 |
| 1426 | ENSG00000277767 | 0.39  | 0.01 |
| 1427 | ENSG00000277782 | -0.74 | 0.00 |
| 1428 | ENSG00000277795 | 1.10  | 0.00 |
| 1429 | ENSG00000277840 | 0.86  | 0.00 |
| 1430 | ENSG00000278376 | -1.18 | 0.00 |
| 1431 | ENSG00000278716 | 1.26  | 0.01 |
| 1432 | ENSG00000278834 | -0.82 | 0.00 |
| 1433 | ENSG00000278961 | -3.22 | 0.00 |
| 1434 | ENSG00000278996 | 1.67  | 0.00 |
| 1435 | ENSG00000279217 | 0.47  | 0.00 |
| 1436 | ENSG00000279342 | 0.72  | 0.00 |
| 1437 | ENSG00000279375 | 1.41  | 0.01 |
| 1438 | ENSG00000279623 | 1.06  | 0.00 |
| 1439 | ENSG00000280114 | 1.84  | 0.00 |
| 1440 | ENSG00000280169 | 0.70  | 0.00 |
| 1441 | ENSG00000280243 | 1.32  | 0.01 |
| 1442 | ENSG00000280341 | 0.59  | 0.01 |
| 1443 | ENSG00000280441 | 1.67  | 0.00 |
| 1444 | ENSG00000280612 | 1.05  | 0.00 |
| 1445 | ENSG00000280614 | -8.51 | 0.00 |
| 1446 | ENSG00000280708 | -0.97 | 0.01 |
| 1447 | ENSG00000280770 | 0.90  | 0.00 |

|      |                 |       |      |
|------|-----------------|-------|------|
| 1448 | ENSG00000280800 | -8.51 | 0.00 |
| 1449 | ENSG00000281019 | 0.69  | 0.00 |
| 1450 | ENSG00000281181 | -8.51 | 0.00 |
| 1451 | ENSG00000281197 | -1.19 | 0.00 |
| 1452 | ENSG00000281344 | 0.53  | 0.00 |
| 1453 | ENSG00000281383 | -8.65 | 0.00 |
| 1454 | ENSG00000281501 | 0.42  | 0.01 |
| 1455 | ENSG00000281617 | 1.20  | 0.00 |
| 1456 | ENSG00000281734 | -1.47 | 0.00 |
| 1457 | ENSG00000281740 | -1.50 | 0.00 |
| 1458 | ENSG00000282024 | 0.93  | 0.01 |
| 1459 | ENSG00000282075 | -2.17 | 0.00 |
| 1460 | ENSG00000282084 | 0.67  | 0.01 |
| 1461 | ENSG00000282091 | 0.58  | 0.00 |
| 1462 | ENSG00000282322 | -2.04 | 0.00 |
| 1463 | ENSG00000282442 | 1.23  | 0.00 |
| 1464 | ENSG00000282461 | -1.98 | 0.00 |
| 1465 | ENSG00000282506 | -1.77 | 0.00 |
| 1466 | ENSG00000282555 | 1.75  | 0.00 |
| 1467 | ENSG00000282666 | -2.07 | 0.00 |
| 1468 | ENSG00000282671 | -2.23 | 0.00 |
| 1469 | ENSG00000282695 | 1.52  | 0.00 |
| 1470 | ENSG00000282827 | -1.51 | 0.00 |
| 1471 | ENSG00000282930 | 0.53  | 0.00 |
| 1472 | ENSG00000283001 | 0.75  | 0.00 |
| 1473 | ENSG00000283103 | -0.77 | 0.00 |
| 1474 | ENSG00000283106 | -0.81 | 0.00 |
| 1475 | ENSG00000283162 | -2.62 | 0.00 |
| 1476 | ENSG00000283192 | -0.86 | 0.00 |
| 1477 | ENSG00000283213 | 0.60  | 0.00 |
| 1478 | ENSG00000283247 | -2.34 | 0.00 |
| 1479 | ENSG00000283735 | 0.48  | 0.00 |
| 1480 | ENSG00000283861 | 0.53  | 0.01 |
| 1481 | ENSG00000283905 | 0.53  | 0.00 |
| 1482 | ENSG00000283907 | -7.60 | 0.00 |
| 1483 | ENSG00000284056 | 0.54  | 0.00 |
| 1484 | ENSG00000284072 | 1.97  | 0.01 |
| 1485 | ENSG00000284274 | -0.93 | 0.01 |
| 1486 | ENSG00000284461 | -1.53 | 0.00 |
| 1487 | ENSG00000284556 | 0.77  | 0.00 |
| 1488 | ENSG00000284578 | 0.70  | 0.00 |
| 1489 | NAA16           | 0.93  | 0.00 |
| 1490 | NAA80           | -1.05 | 0.00 |
| 1491 | NAB2            | -1.03 | 0.00 |
| 1492 | NABP2           | -0.99 | 0.00 |
| 1493 | NAGS            | -1.28 | 0.01 |
| 1494 | NAPA            | -0.65 | 0.01 |
| 1495 | NAT14           | -1.02 | 0.00 |
| 1496 | NBDY            | -0.69 | 0.00 |
| 1497 | NBEAL1          | 0.52  | 0.01 |

|      |         |       |      |
|------|---------|-------|------|
| 1498 | NBL1    | -1.28 | 0.00 |
| 1499 | NCKAP1  | 0.49  | 0.01 |
| 1500 | NCKIPSD | -0.80 | 0.00 |
| 1501 | NCOA5   | -0.44 | 0.00 |
| 1502 | ND4     | -1.83 | 0.00 |
| 1503 | ND4L    | -1.69 | 0.00 |
| 1504 | NDUFA3  | -1.73 | 0.00 |
| 1505 | NDUFA3  | -1.73 | 0.00 |
| 1506 | NDUFA3  | -1.73 | 0.00 |
| 1507 | NDUFA3  | -1.73 | 0.00 |
| 1508 | NDUFA3  | -1.73 | 0.00 |
| 1509 | NDUFA3  | -1.73 | 0.00 |
| 1510 | NDUFA3  | -1.73 | 0.00 |
| 1511 | NDUFA3  | -1.73 | 0.00 |
| 1512 | NDUFA7  | -1.35 | 0.00 |
| 1513 | NDUFAF3 | -1.65 | 0.00 |
| 1514 | NDUFAF8 | -1.31 | 0.00 |
| 1515 | NDUFB1  | -0.71 | 0.01 |
| 1516 | NDUFB10 | -0.75 | 0.00 |
| 1517 | NDUFB4  | -0.66 | 0.01 |
| 1518 | NDUFB8  | -0.67 | 0.01 |
| 1519 | NEAT1   | 1.13  | 0.00 |
| 1520 | NECAP2  | -0.49 | 0.00 |
| 1521 | NECTIN2 | -1.15 | 0.00 |
| 1522 | NEDD8   | -0.80 | 0.00 |
| 1523 | NEK9    | -0.49 | 0.00 |
| 1524 | NELFE   | -0.69 | 0.00 |
| 1525 | NENF    | -0.91 | 0.00 |
| 1526 | NF1     | 0.69  | 0.00 |
| 1527 | NFAT5   | 0.79  | 0.00 |
| 1528 | NFKB2   | -0.60 | 0.00 |
| 1529 | NFXL1   | 0.71  | 0.00 |
| 1530 | NINJ1   | -0.89 | 0.00 |
| 1531 | NINJ2   | -0.94 | 0.00 |
| 1532 | NMB     | -1.87 | 0.00 |
| 1533 | NME1    | -0.99 | 0.01 |
| 1534 | NME2    | -0.92 | 0.00 |
| 1535 | NOLC1   | -0.68 | 0.00 |
| 1536 | NOM1    | 0.57  | 0.00 |
| 1537 | NOP16   | -0.80 | 0.00 |
| 1538 | NOP53   | -0.85 | 0.00 |
| 1539 | NPHP3   | 0.48  | 0.00 |
| 1540 | NPIPB12 | 0.97  | 0.00 |
| 1541 | NPIPB4  | 0.56  | 0.00 |
| 1542 | NPIPB5  | 0.70  | 0.00 |
| 1543 | NPRL2   | -0.87 | 0.00 |
| 1544 | NR1H2   | -0.80 | 0.00 |
| 1545 | NR2C2AP | -1.18 | 0.00 |
| 1546 | NRGN    | -1.14 | 0.00 |
| 1547 | NRM     | -1.22 | 0.00 |



|      |            |       |      |
|------|------------|-------|------|
| 1548 | NRM        | -1.21 | 0.00 |
| 1549 | NRM        | -1.21 | 0.00 |
| 1550 | NRM        | -1.21 | 0.00 |
| 1551 | NRM        | -1.20 | 0.00 |
| 1552 | NRM        | -1.22 | 0.00 |
| 1553 | NRM        | -1.22 | 0.00 |
| 1554 | NRXN2      | -1.18 | 0.00 |
| 1555 | NSUN5      | -0.80 | 0.00 |
| 1556 | NT5C       | -0.83 | 0.01 |
| 1557 | NTMT1      | -0.92 | 0.00 |
| 1558 | NUBP1      | -0.79 | 0.00 |
| 1559 | NUDC       | -0.66 | 0.00 |
| 1560 | NUDT1      | -0.70 | 0.00 |
| 1561 | NUDT22     | -0.97 | 0.00 |
| 1562 | NUP160     | 0.45  | 0.01 |
| 1563 | NUP62      | -0.53 | 0.01 |
| 1564 | NUPR1      | -0.95 | 0.00 |
| 1565 | NUTM2B-AS1 | 0.58  | 0.00 |
| 1566 | NXPE4      | 1.11  | 0.01 |
| 1567 | NXPH3      | -1.36 | 0.00 |
| 1568 | OAF        | -0.91 | 0.00 |
| 1569 | OBI1-AS1   | 1.15  | 0.00 |
| 1570 | OCEL1      | -0.98 | 0.00 |
| 1571 | OCLM       | 0.74  | 0.00 |
| 1572 | OGG1       | -0.69 | 0.00 |
| 1573 | OLFM1      | -1.21 | 0.01 |
| 1574 | OLFML3     | -0.97 | 0.00 |
| 1575 | OMG        | 0.73  | 0.00 |
| 1576 | OR51B5     | 0.88  | 0.00 |
| 1577 | ORAI3      | -0.78 | 0.00 |
| 1578 | ORC4       | 0.61  | 0.00 |
| 1579 | OTOG       | 2.08  | 0.01 |
| 1580 | OXA1L      | -1.32 | 0.00 |
| 1581 | PACSIN1    | -0.98 | 0.01 |
| 1582 | PACSIN3    | -0.92 | 0.01 |
| 1583 | PAF1       | -0.82 | 0.00 |
| 1584 | PAQR7      | -0.92 | 0.00 |
| 1585 | PARD6A     | -1.16 | 0.00 |
| 1586 | PARK7      | -0.55 | 0.01 |
| 1587 | PARP3      | -0.94 | 0.00 |
| 1588 | PCAT2      | 1.52  | 0.00 |
| 1589 | PCBP1-AS1  | 0.79  | 0.00 |
| 1590 | PCDHB14    | 0.98  | 0.01 |
| 1591 | PCED1A     | -0.72 | 0.00 |
| 1592 | PCMTD1     | 0.71  | 0.01 |
| 1593 | PCSK2      | 0.99  | 0.00 |
| 1594 | PDAP1      | -0.57 | 0.00 |
| 1595 | PDE10A     | 0.86  | 0.00 |
| 1596 | PDE6B      | -1.17 | 0.00 |
| 1597 | PDE6G      | -2.29 | 0.00 |

|      |                  |       |      |
|------|------------------|-------|------|
| 1598 | PDK2             | -1.82 | 0.00 |
| 1599 | PDRG1            | -0.95 | 0.00 |
| 1600 | PDS5A            | 0.41  | 0.01 |
| 1601 | PDXDC2P-NPIP814P | 0.59  | 0.00 |
| 1602 | PDZK1            | -2.09 | 0.00 |
| 1603 | PEBP1            | -0.94 | 0.00 |
| 1604 | PEF1             | -0.65 | 0.00 |
| 1605 | PEMT             | -0.88 | 0.00 |
| 1606 | PET100           | -0.96 | 0.00 |
| 1607 | PEX10            | -0.76 | 0.01 |
| 1608 | PEX11G           | -1.16 | 0.00 |
| 1609 | PEX12            | -0.73 | 0.00 |
| 1610 | PEX19            | -0.43 | 0.01 |
| 1611 | PFDN5            | -0.72 | 0.00 |
| 1612 | PFDN6            | -1.12 | 0.00 |
| 1613 | PFDN6            | -1.11 | 0.00 |
| 1614 | PGF              | -1.35 | 0.00 |
| 1615 | PGLS             | -0.80 | 0.00 |
| 1616 | PGLYRP2          | -3.20 | 0.00 |
| 1617 | PHF1             | -0.75 | 0.01 |
| 1618 | PHF14            | 0.69  | 0.00 |
| 1619 | PHF23            | -0.74 | 0.00 |
| 1620 | PHLPP1           | 0.68  | 0.00 |
| 1621 | PHPT1            | -1.18 | 0.00 |
| 1622 | PIBF1            | 0.66  | 0.01 |
| 1623 | PICALM           | 0.44  | 0.00 |
| 1624 | PIGP             | -0.87 | 0.00 |
| 1625 | PIGT             | -0.92 | 0.00 |
| 1626 | PIGV             | -1.23 | 0.00 |
| 1627 | PIH1D1           | -0.69 | 0.00 |
| 1628 | PIK3CB           | 0.63  | 0.00 |
| 1629 | PILRA            | -0.95 | 0.00 |
| 1630 | PIN1             | -0.91 | 0.00 |
| 1631 | PINK1            | -0.70 | 0.00 |
| 1632 | PINK1-AS         | -0.68 | 0.01 |
| 1633 | PITHD1           | -0.54 | 0.00 |
| 1634 | PITPNA-AS1       | -1.38 | 0.00 |
| 1635 | PKIG             | -0.96 | 0.00 |
| 1636 | PLAAT4           | -1.60 | 0.00 |
| 1637 | PLCD1            | -0.80 | 0.01 |
| 1638 | PLEKHJ1          | -0.74 | 0.00 |
| 1639 | PLG              | 0.64  | 0.00 |
| 1640 | PLP2             | -1.84 | 0.00 |
| 1641 | PLPPR5           | 1.88  | 0.00 |
| 1642 | PLTP             | -1.18 | 0.00 |
| 1643 | PM20D1           | -1.54 | 0.01 |
| 1644 | PMEL             | -0.94 | 0.00 |
| 1645 | PMVK             | -0.96 | 0.00 |
| 1646 | PNMA8B           | -1.50 | 0.00 |
| 1647 | POLA1            | 0.54  | 0.00 |

|      |              |       |      |
|------|--------------|-------|------|
| 1648 | POLD4        | -1.30 | 0.00 |
| 1649 | POLR2E       | -1.08 | 0.00 |
| 1650 | POLR2G       | -0.94 | 0.00 |
| 1651 | POLR2I       | -1.02 | 0.00 |
| 1652 | POLR2J       | -0.70 | 0.01 |
| 1653 | POLR2L       | -1.43 | 0.00 |
| 1654 | POLR3GL      | -0.77 | 0.00 |
| 1655 | POP5         | -0.65 | 0.00 |
| 1656 | PORCN        | -1.24 | 0.00 |
| 1657 | POU3F1       | -2.22 | 0.00 |
| 1658 | POU5F2       | 0.59  | 0.01 |
| 1659 | PPBP         | -1.39 | 0.00 |
| 1660 | PPIAP46      | 0.72  | 0.00 |
| 1661 | PPM1M        | -0.77 | 0.00 |
| 1662 | PPP1CA       | -0.69 | 0.01 |
| 1663 | PPP1R10      | -0.47 | 0.00 |
| 1664 | PPP1R14B-AS1 | -1.62 | 0.00 |
| 1665 | PPP1R15A     | -0.76 | 0.00 |
| 1666 | PPP1R18      | -0.90 | 0.00 |
| 1667 | PPP1R18      | -0.86 | 0.01 |
| 1668 | PPP1R18      | -0.85 | 0.01 |
| 1669 | PPP1R9B      | -1.18 | 0.00 |
| 1670 | PPP2R5E      | 0.38  | 0.00 |
| 1671 | PPP3R1       | 0.66  | 0.00 |
| 1672 | PQBP1        | -0.75 | 0.00 |
| 1673 | PRAF2        | -1.21 | 0.00 |
| 1674 | PRDX5        | -0.82 | 0.00 |
| 1675 | PRDX6        | -0.63 | 0.01 |
| 1676 | PREB         | -0.64 | 0.00 |
| 1677 | PRG4         | -1.03 | 0.01 |
| 1678 | PRH1         | 0.85  | 0.01 |
| 1679 | PRICKLE4     | -1.56 | 0.00 |
| 1680 | PRKAR2A-AS1  | -0.54 | 0.00 |
| 1681 | PRLHR        | 1.06  | 0.00 |
| 1682 | PRNCR1       | 0.67  | 0.00 |
| 1683 | PROSER1      | 0.82  | 0.00 |
| 1684 | PRPF31       | -0.83 | 0.00 |
| 1685 | PRPF31       | -0.81 | 0.00 |
| 1686 | PRR13        | -0.76 | 0.00 |
| 1687 | PRR29        | -1.34 | 0.01 |
| 1688 | PRRT3        | -1.35 | 0.00 |
| 1689 | PRRX2        | -1.41 | 0.00 |
| 1690 | PRSS36       | -1.02 | 0.00 |
| 1691 | PRXL2B       | -0.96 | 0.01 |
| 1692 | PRXL2B       | -0.96 | 0.01 |
| 1693 | PSD          | -1.04 | 0.00 |
| 1694 | PSENE1       | -2.42 | 0.00 |
| 1695 | PSMB8-AS1    | -1.20 | 0.00 |
| 1696 | PSMB8-AS1    | -1.20 | 0.00 |
| 1697 | PSMB8-AS1    | -1.44 | 0.00 |

|      |            |       |      |
|------|------------|-------|------|
| 1698 | PSMB8-AS1  | -1.20 | 0.00 |
| 1699 | PSMB9      | -3.03 | 0.00 |
| 1700 | PSMB9      | -3.30 | 0.00 |
| 1701 | PSMB9      | -3.03 | 0.00 |
| 1702 | PSMC3IP    | -0.87 | 0.00 |
| 1703 | PSMC5      | -0.88 | 0.00 |
| 1704 | PSMD4      | -0.60 | 0.01 |
| 1705 | PSME4      | 0.88  | 0.00 |
| 1706 | PSMG3      | -1.15 | 0.00 |
| 1707 | PSORS1C1   | -1.81 | 0.01 |
| 1708 | PSORS1C1   | -1.77 | 0.00 |
| 1709 | PTBP1      | -0.60 | 0.00 |
| 1710 | PTBP2      | 0.64  | 0.01 |
| 1711 | PTMS       | -1.32 | 0.00 |
| 1712 | PTPMT1     | -0.81 | 0.00 |
| 1713 | PTPN1      | -0.90 | 0.00 |
| 1714 | PTPN12     | 0.75  | 0.00 |
| 1715 | PTPN5      | 0.64  | 0.01 |
| 1716 | PTRH1      | -1.13 | 0.00 |
| 1717 | PTX3       | 1.52  | 0.01 |
| 1718 | PURPL      | 1.33  | 0.01 |
| 1719 | PYCARD-AS1 | -1.66 | 0.00 |
| 1720 | PYDC1      | -4.37 | 0.00 |
| 1721 | PYGO2      | -0.73 | 0.00 |
| 1722 | QARS1      | -0.47 | 0.01 |
| 1723 | R3HDM4     | -0.76 | 0.00 |
| 1724 | RAB1B      | -1.02 | 0.00 |
| 1725 | RAB24      | -0.84 | 0.00 |
| 1726 | RAB25      | -0.84 | 0.01 |
| 1727 | RAB34      | -0.91 | 0.01 |
| 1728 | RAB35      | -0.47 | 0.01 |
| 1729 | RAB4A      | -0.51 | 0.01 |
| 1730 | RAB5C      | -0.56 | 0.00 |
| 1731 | RAB8A      | -0.55 | 0.00 |
| 1732 | RAC2       | -1.25 | 0.00 |
| 1733 | RACK1      | -0.70 | 0.00 |
| 1734 | RAD21-AS1  | 0.53  | 0.01 |
| 1735 | RAD51C     | -0.61 | 0.01 |
| 1736 | RAI2       | -1.73 | 0.00 |
| 1737 | RAMP1      | -1.22 | 0.01 |
| 1738 | RAMP2      | -2.83 | 0.00 |
| 1739 | RANBP17    | 0.79  | 0.00 |
| 1740 | RANGRF     | -1.19 | 0.00 |
| 1741 | RAPGEF3    | -1.05 | 0.00 |
| 1742 | RAPGEFL1   | -1.40 | 0.01 |
| 1743 | RASSF1     | -0.61 | 0.01 |
| 1744 | RASSF1-AS1 | -1.41 | 0.00 |
| 1745 | RBM10      | -0.59 | 0.00 |
| 1746 | RBM15B     | -0.62 | 0.00 |
| 1747 | RBM8A      | -0.57 | 0.00 |

|      |                 |       |      |
|------|-----------------|-------|------|
| 1748 | RBMX2           | -0.50 | 0.00 |
| 1749 | RBP7            | -1.27 | 0.01 |
| 1750 | REPS1           | 0.63  | 0.00 |
| 1751 | RETREG2         | -0.78 | 0.00 |
| 1752 | REV1            | 0.39  | 0.01 |
| 1753 | REX1BD          | -0.84 | 0.01 |
| 1754 | RFX5            | -0.59 | 0.00 |
| 1755 | RFXANK          | -0.94 | 0.00 |
| 1756 | RGP1            | -0.61 | 0.00 |
| 1757 | RGS1            | 1.75  | 0.00 |
| 1758 | RGSL1           | 1.08  | 0.00 |
| 1759 | RHBDD2          | -0.92 | 0.00 |
| 1760 | RHOC            | -0.91 | 0.00 |
| 1761 | RHOD            | -1.18 | 0.00 |
| 1762 | RIC8A           | -0.72 | 0.00 |
| 1763 | RICTOR          | 0.46  | 0.01 |
| 1764 | RIOX1           | -0.53 | 0.01 |
| 1765 | RIPK3           | -0.91 | 0.00 |
| 1766 | RIPOR3          | -1.07 | 0.00 |
| 1767 | RITA1           | -0.77 | 0.00 |
| 1768 | RNASE1          | -1.44 | 0.00 |
| 1769 | RNASEK          | -1.30 | 0.00 |
| 1770 | RNASEK-C17orf49 | -1.48 | 0.01 |
| 1771 | RNF10           | 0.40  | 0.00 |
| 1772 | RNF113A         | -0.79 | 0.00 |
| 1773 | RNF149          | 0.39  | 0.00 |
| 1774 | RNF167          | -1.04 | 0.00 |
| 1775 | RNF185          | -0.61 | 0.01 |
| 1776 | RNF220          | -0.61 | 0.00 |
| 1777 | RNF25           | -0.61 | 0.00 |
| 1778 | RNH1            | -0.72 | 0.00 |
| 1779 | RNH1            | -0.69 | 0.00 |
| 1780 | RNPC3           | 0.63  | 0.00 |
| 1781 | RNU12           | 1.06  | 0.00 |
| 1782 | RNU5A-1         | 1.32  | 0.01 |
| 1783 | RNU5B-1         | 1.41  | 0.01 |
| 1784 | ROBO3           | -1.33 | 0.00 |
| 1785 | ROCK1           | 0.57  | 0.00 |
| 1786 | ROM1            | -1.12 | 0.00 |
| 1787 | RPA2            | -0.46 | 0.00 |
| 1788 | RPL11           | -0.68 | 0.00 |
| 1789 | RPL12           | -0.83 | 0.00 |
| 1790 | RPL13A          | -0.96 | 0.00 |
| 1791 | RPL14           | -0.91 | 0.00 |
| 1792 | RPL18           | -0.82 | 0.00 |
| 1793 | RPL22           | -0.68 | 0.00 |
| 1794 | RPL28           | -0.93 | 0.00 |
| 1795 | RPL29           | -0.84 | 0.01 |
| 1796 | RPL3            | -0.74 | 0.00 |
| 1797 | RPL37A          | -0.75 | 0.01 |

|      |            |       |      |
|------|------------|-------|------|
| 1798 | RPL41      | -0.94 | 0.00 |
| 1799 | RPL8       | -1.02 | 0.00 |
| 1800 | RPLP0      | -0.89 | 0.00 |
| 1801 | RPLP1      | -0.94 | 0.00 |
| 1802 | RPP25      | -1.31 | 0.00 |
| 1803 | RPS11      | -0.63 | 0.01 |
| 1804 | RPS15      | -1.73 | 0.00 |
| 1805 | RPS17      | -0.91 | 0.00 |
| 1806 | RPS17      | -0.91 | 0.00 |
| 1807 | RPS2       | -0.82 | 0.00 |
| 1808 | RPS26      | -1.00 | 0.00 |
| 1809 | RPSA       | -1.02 | 0.00 |
| 1810 | RPUSD3     | -0.72 | 0.00 |
| 1811 | RRAGC      | 0.37  | 0.00 |
| 1812 | RRAS       | -1.18 | 0.00 |
| 1813 | RRP9       | -1.06 | 0.00 |
| 1814 | RSAD1      | -0.71 | 0.00 |
| 1815 | RSPO1      | -2.64 | 0.00 |
| 1816 | RTN2       | -1.30 | 0.00 |
| 1817 | RTN4       | 0.54  | 0.00 |
| 1818 | RTP4       | -1.03 | 0.00 |
| 1819 | RTTN       | 0.52  | 0.01 |
| 1820 | RUNDC3A    | -1.29 | 0.00 |
| 1821 | RUVBL2     | -0.59 | 0.00 |
| 1822 | RYBP       | -1.00 | 0.00 |
| 1823 | S100A11    | -0.97 | 0.00 |
| 1824 | S100A13    | -1.64 | 0.00 |
| 1825 | S100A2     | -2.22 | 0.00 |
| 1826 | S100A4     | -1.18 | 0.01 |
| 1827 | SAFB2      | 0.50  | 0.01 |
| 1828 | SARS1      | -0.62 | 0.00 |
| 1829 | SART1      | -0.51 | 0.01 |
| 1830 | SASH3      | -0.96 | 0.00 |
| 1831 | SAT2       | -0.91 | 0.00 |
| 1832 | SCAMP1-AS1 | -1.01 | 0.00 |
| 1833 | SCARNA10   | 0.96  | 0.01 |
| 1834 | SCFD1      | 0.66  | 0.00 |
| 1835 | SCN1A      | 0.62  | 0.00 |
| 1836 | SCN1B      | -0.89 | 0.00 |
| 1837 | SCN4B      | -1.37 | 0.00 |
| 1838 | SCNM1      | -0.74 | 0.00 |
| 1839 | SCRN2      | -1.27 | 0.00 |
| 1840 | SDCBP2-AS1 | 0.55  | 0.00 |
| 1841 | SDR39U1    | -1.03 | 0.00 |
| 1842 | SDSL       | -0.99 | 0.00 |
| 1843 | SEC63      | 0.65  | 0.00 |
| 1844 | SECISBP2L  | 0.48  | 0.01 |
| 1845 | SELPLG     | -1.16 | 0.00 |
| 1846 | SENP3      | -0.37 | 0.00 |
| 1847 | SENP6      | 0.52  | 0.00 |

|      |              |       |      |
|------|--------------|-------|------|
| 1848 | SEPTIN4      | -0.83 | 0.00 |
| 1849 | SERPINA1     | -2.13 | 0.00 |
| 1850 | SERPINF1     | -0.79 | 0.00 |
| 1851 | SERPING1     | -1.40 | 0.00 |
| 1852 | SH2D3C       | -0.98 | 0.00 |
| 1853 | SH3BGRL3     | -2.01 | 0.00 |
| 1854 | SHARPIN      | -0.94 | 0.00 |
| 1855 | SHFL         | -0.98 | 0.00 |
| 1856 | SHISA5       | -1.10 | 0.00 |
| 1857 | SHPRH        | 0.54  | 0.01 |
| 1858 | SIAE         | -0.89 | 0.01 |
| 1859 | SIRT2        | -0.46 | 0.01 |
| 1860 | SIRT2        | -0.46 | 0.01 |
| 1861 | SIX5         | -0.98 | 0.00 |
| 1862 | SLC10A1      | -1.01 | 0.00 |
| 1863 | SLC10A2      | 0.99  | 0.00 |
| 1864 | SLC12A5      | -1.69 | 0.00 |
| 1865 | SLC16A13     | -0.85 | 0.00 |
| 1866 | SLC16A5      | -1.38 | 0.01 |
| 1867 | SLC1A2       | -1.64 | 0.01 |
| 1868 | SLC22A8      | 2.68  | 0.00 |
| 1869 | SLC25A11     | -0.92 | 0.00 |
| 1870 | SLC25A21-AS1 | -1.04 | 0.00 |
| 1871 | SLC25A28     | -0.77 | 0.00 |
| 1872 | SLC25A36     | 0.52  | 0.00 |
| 1873 | SLC25A38     | -0.85 | 0.00 |
| 1874 | SLC25A39     | -1.09 | 0.00 |
| 1875 | SLC25A6      | -0.95 | 0.00 |
| 1876 | SLC26A3      | 2.97  | 0.00 |
| 1877 | SLC35B1      | -0.97 | 0.00 |
| 1878 | SLC38A6      | 0.38  | 0.01 |
| 1879 | SLC39A3      | -0.83 | 0.00 |
| 1880 | SLC39A4      | -1.19 | 0.00 |
| 1881 | SLC46A1      | -0.63 | 0.01 |
| 1882 | SLC48A1      | -0.90 | 0.00 |
| 1883 | SLC4A11      | 1.77  | 0.00 |
| 1884 | SLC6A9       | -1.31 | 0.01 |
| 1885 | SLC9A7P1     | -0.85 | 0.01 |
| 1886 | SMARCA5-AS1  | -1.05 | 0.00 |
| 1887 | SMARCB1      | -0.72 | 0.00 |
| 1888 | SMG1         | 0.60  | 0.00 |
| 1889 | SMG1P1       | 0.60  | 0.00 |
| 1890 | SMG1P7       | 0.49  | 0.01 |
| 1891 | SMIM10       | -0.89 | 0.00 |
| 1892 | SMIM11A      | -1.80 | 0.00 |
| 1893 | SMIM17       | 1.18  | 0.00 |
| 1894 | SMIM27       | -0.70 | 0.00 |
| 1895 | SMIM29       | -0.93 | 0.00 |
| 1896 | SMIM34A      | -3.22 | 0.00 |
| 1897 | SMIM4        | -1.07 | 0.00 |

|      |             |       |      |
|------|-------------|-------|------|
| 1898 | SMPD2       | -0.82 | 0.00 |
| 1899 | SNAPC2      | -0.97 | 0.00 |
| 1900 | SNAPC5      | -0.67 | 0.00 |
| 1901 | SNF8        | -0.81 | 0.00 |
| 1902 | SNHG19      | -1.09 | 0.01 |
| 1903 | SNHG31      | 0.59  | 0.00 |
| 1904 | SNHG32      | -0.67 | 0.01 |
| 1905 | SNHG32      | -0.77 | 0.00 |
| 1906 | SNHG32      | -0.82 | 0.00 |
| 1907 | SNHG32      | -0.77 | 0.00 |
| 1908 | SNHG9       | -2.32 | 0.00 |
| 1909 | SNORA11D    | 1.77  | 0.00 |
| 1910 | SNORA11E    | 1.77  | 0.00 |
| 1911 | SNORA18     | 1.89  | 0.00 |
| 1912 | SNORA23     | 1.13  | 0.00 |
| 1913 | SNORA2A     | 1.25  | 0.00 |
| 1914 | SNORA33     | 1.02  | 0.00 |
| 1915 | SNORA35B    | 1.72  | 0.00 |
| 1916 | SNORA3A     | 1.43  | 0.01 |
| 1917 | SNORA44     | 1.36  | 0.01 |
| 1918 | SNORA53     | 1.16  | 0.00 |
| 1919 | SNORA61     | 1.78  | 0.00 |
| 1920 | SNORA74B    | 0.85  | 0.00 |
| 1921 | SNORA79B    | 1.46  | 0.01 |
| 1922 | SNORA9      | 1.88  | 0.01 |
| 1923 | SNORD105B   | 1.80  | 0.00 |
| 1924 | SNORD116-24 | 0.91  | 0.01 |
| 1925 | SNORD17     | 0.86  | 0.00 |
| 1926 | SNORD28     | 2.76  | 0.01 |
| 1927 | SNORD3C     | 1.40  | 0.00 |
| 1928 | SNORD46     | 1.91  | 0.00 |
| 1929 | SNORD53     | 0.94  | 0.00 |
| 1930 | SNORD71     | 0.89  | 0.00 |
| 1931 | SNRNP25     | -0.84 | 0.00 |
| 1932 | SNRNP35     | -0.48 | 0.01 |
| 1933 | SNRPC       | -0.86 | 0.00 |
| 1934 | SNTG1       | 0.99  | 0.00 |
| 1935 | SNUPN       | -0.50 | 0.00 |
| 1936 | SNX12       | -0.42 | 0.00 |
| 1937 | SNX14       | 0.47  | 0.00 |
| 1938 | SNX15       | -0.65 | 0.00 |
| 1939 | SNX32       | -0.79 | 0.01 |
| 1940 | SNX33       | -0.81 | 0.00 |
| 1941 | SORCS1      | -2.92 | 0.00 |
| 1942 | SOX2-OT     | 0.50  | 0.01 |
| 1943 | SOX30       | -1.83 | 0.00 |
| 1944 | SPACA9      | -0.80 | 0.00 |
| 1945 | SPAG7       | -0.71 | 0.00 |
| 1946 | SPATA20     | -0.81 | 0.00 |
| 1947 | SPDYE5      | 0.95  | 0.00 |



|      |           |       |      |
|------|-----------|-------|------|
| 1948 | SPI1      | -0.88 | 0.00 |
| 1949 | SPNS1     | -0.62 | 0.01 |
| 1950 | SRARP     | -1.79 | 0.01 |
| 1951 | SRP14     | -0.64 | 0.01 |
| 1952 | SSBP3-AS1 | 0.72  | 0.00 |
| 1953 | SSC4D     | -1.12 | 0.01 |
| 1954 | ST8SIA5   | 1.78  | 0.00 |
| 1955 | STAG1     | 0.43  | 0.01 |
| 1956 | STAM-AS1  | -0.78 | 0.00 |
| 1957 | STARD10   | -1.53 | 0.00 |
| 1958 | STC1      | -1.43 | 0.01 |
| 1959 | STING1    | -1.29 | 0.00 |
| 1960 | STK16     | -0.70 | 0.01 |
| 1961 | STN1      | -0.48 | 0.00 |
| 1962 | STRN3     | 0.61  | 0.01 |
| 1963 | STUB1     | -0.61 | 0.01 |
| 1964 | STX10     | -0.83 | 0.00 |
| 1965 | STX4      | -0.54 | 0.01 |
| 1966 | STXBP5L   | 1.74  | 0.00 |
| 1967 | SUGP1     | -0.56 | 0.00 |
| 1968 | SULT1B1   | 0.67  | 0.01 |
| 1969 | SUMO4     | 0.78  | 0.00 |
| 1970 | SUPT7L    | -0.46 | 0.00 |
| 1971 | SURF1     | -1.01 | 0.00 |
| 1972 | SURF1     | -1.01 | 0.00 |
| 1973 | SURF2     | -0.81 | 0.00 |
| 1974 | SURF2     | -0.81 | 0.00 |
| 1975 | SURF6     | -0.71 | 0.00 |
| 1976 | SURF6     | -0.71 | 0.00 |
| 1977 | SUSD3     | -2.55 | 0.00 |
| 1978 | SUSD4     | -1.57 | 0.00 |
| 1979 | SUZ12     | 0.66  | 0.00 |
| 1980 | SVBP      | -0.62 | 0.01 |
| 1981 | SVOP      | 1.38  | 0.00 |
| 1982 | SWI5      | -0.95 | 0.00 |
| 1983 | SWSAP1    | -0.69 | 0.00 |
| 1984 | SYCE1L    | -1.11 | 0.01 |
| 1985 | SYF2      | -0.49 | 0.01 |
| 1986 | SYT13     | -2.87 | 0.00 |
| 1987 | SYT9      | -1.56 | 0.00 |
| 1988 | SZRD1     | -0.51 | 0.01 |
| 1989 | TADA2A    | 1.07  | 0.00 |
| 1990 | TADA3     | -0.60 | 0.01 |
| 1991 | TAF10     | -1.02 | 0.00 |
| 1992 | TAF9      | -0.56 | 0.01 |
| 1993 | TAPBPL    | -0.96 | 0.00 |
| 1994 | TBC1D15   | 0.47  | 0.00 |
| 1995 | TBC1D32   | 0.70  | 0.00 |
| 1996 | TBC1D8B   | 0.41  | 0.01 |
| 1997 | TBCB      | -0.82 | 0.01 |

|      |          |       |      |
|------|----------|-------|------|
| 1998 | TCEAL2   | -1.38 | 0.00 |
| 1999 | TCEAL3   | -1.14 | 0.00 |
| 2000 | TCERG1   | 0.54  | 0.00 |
| 2001 | TCTA     | -1.22 | 0.00 |
| 2002 | TDRD12   | 1.83  | 0.00 |
| 2003 | TECR     | -1.02 | 0.00 |
| 2004 | TEX101   | -5.07 | 0.00 |
| 2005 | TEX12    | 1.53  | 0.00 |
| 2006 | TEX264   | -0.80 | 0.01 |
| 2007 | TFE3     | -0.75 | 0.00 |
| 2008 | TFIP11   | -0.51 | 0.00 |
| 2009 | TGFBR3   | -1.94 | 0.00 |
| 2010 | TH2LCRR  | 0.85  | 0.01 |
| 2011 | THADA    | 0.49  | 0.00 |
| 2012 | THAP3    | -0.55 | 0.00 |
| 2013 | THAP4    | -0.66 | 0.01 |
| 2014 | THAP7    | -1.17 | 0.00 |
| 2015 | THBS4    | -1.14 | 0.00 |
| 2016 | THY1     | -1.46 | 0.00 |
| 2017 | TIA1     | 0.53  | 0.01 |
| 2018 | TIAL1    | 0.59  | 0.00 |
| 2019 | TIE1     | -0.88 | 0.01 |
| 2020 | TIMM13   | -1.59 | 0.00 |
| 2021 | TIMM22   | -0.69 | 0.00 |
| 2022 | TIMM22   | -0.69 | 0.00 |
| 2023 | TIMM22   | -0.69 | 0.00 |
| 2024 | TIMP1    | -1.48 | 0.00 |
| 2025 | TINF2    | -0.47 | 0.01 |
| 2026 | TIRAP    | -0.36 | 0.01 |
| 2027 | TLCD2    | -0.78 | 0.00 |
| 2028 | TLCD2    | -0.78 | 0.00 |
| 2029 | TLE5     | -1.08 | 0.00 |
| 2030 | TLR5     | -0.76 | 0.00 |
| 2031 | TMA7     | -0.89 | 0.00 |
| 2032 | TMED1    | -0.72 | 0.01 |
| 2033 | TMED3    | -0.87 | 0.01 |
| 2034 | TMEM102  | -0.76 | 0.00 |
| 2035 | TMEM102  | -0.76 | 0.00 |
| 2036 | TMEM11   | -0.65 | 0.00 |
| 2037 | TMEM115  | -1.01 | 0.00 |
| 2038 | TMEM125  | -1.29 | 0.00 |
| 2039 | TMEM129  | -0.70 | 0.00 |
| 2040 | TMEM131  | 0.54  | 0.00 |
| 2041 | TMEM131L | 0.81  | 0.01 |
| 2042 | TMEM150A | -0.75 | 0.00 |
| 2043 | TMEM160  | -1.15 | 0.00 |
| 2044 | TMEM175  | -0.75 | 0.00 |
| 2045 | TMEM179B | -0.84 | 0.00 |
| 2046 | TMEM189  | -0.90 | 0.01 |
| 2047 | TMEM204  | -0.72 | 0.00 |

|      |             |       |      |
|------|-------------|-------|------|
| 2048 | TMEM205     | -1.38 | 0.00 |
| 2049 | TMEM214     | -0.65 | 0.00 |
| 2050 | TMEM216     | -0.71 | 0.00 |
| 2051 | TMEM219     | -0.94 | 0.00 |
| 2052 | TMEM223     | -0.69 | 0.00 |
| 2053 | TMEM229B    | -0.76 | 0.00 |
| 2054 | TMEM259     | -0.74 | 0.01 |
| 2055 | TMEM30B     | -0.93 | 0.00 |
| 2056 | TMEM42      | -0.92 | 0.00 |
| 2057 | TMEM42      | -0.92 | 0.00 |
| 2058 | TMEM69      | -1.02 | 0.00 |
| 2059 | TMPRSS11A   | 1.25  | 0.01 |
| 2060 | TMPRSS11BNL | 0.95  | 0.01 |
| 2061 | TMPRSS12    | 0.62  | 0.01 |
| 2062 | TMPRSS3     | -2.43 | 0.00 |
| 2063 | TMUB1       | -0.64 | 0.01 |
| 2064 | TMUB2       | -0.81 | 0.00 |
| 2065 | TNFAIP8L2   | -0.83 | 0.00 |
| 2066 | TNFRSF14    | -0.89 | 0.00 |
| 2067 | TNFRSF14    | -0.91 | 0.00 |
| 2068 | TNFRSF4     | -1.29 | 0.01 |
| 2069 | TNFSF12     | -0.75 | 0.01 |
| 2070 | TNIP2       | -0.59 | 0.00 |
| 2071 | TOE1        | -0.88 | 0.00 |
| 2072 | TOLLIP-AS1  | -1.54 | 0.00 |
| 2073 | TRAPPC2L    | -0.83 | 0.00 |
| 2074 | TRAPPC3L    | 0.56  | 0.01 |
| 2075 | TREX1       | -1.29 | 0.00 |
| 2076 | TRIM52-AS1  | -1.13 | 0.00 |
| 2077 | TRIM55      | -2.51 | 0.00 |
| 2078 | TRIM68      | -0.71 | 0.01 |
| 2079 | TRIO        | 0.58  | 0.00 |
| 2080 | TRIR        | -1.17 | 0.00 |
| 2081 | TRMT11      | 0.77  | 0.00 |
| 2082 | TRPT1       | -1.09 | 0.00 |
| 2083 | TSC22D2     | 0.70  | 0.00 |
| 2084 | TSR2        | -0.96 | 0.00 |
| 2085 | TSR3        | -0.77 | 0.00 |
| 2086 | TSSK6       | -0.87 | 0.01 |
| 2087 | TTC31       | -0.43 | 0.00 |
| 2088 | TTC33       | 0.48  | 0.00 |
| 2089 | TTC36       | -1.43 | 0.01 |
| 2090 | TTC3-AS1    | 0.73  | 0.00 |
| 2091 | TUBB1       | -0.88 | 0.00 |
| 2092 | TUBG1       | -0.72 | 0.00 |
| 2093 | TUBG2       | -0.82 | 0.01 |
| 2094 | TUT1        | -0.88 | 0.00 |
| 2095 | TWIST2      | -1.29 | 0.00 |
| 2096 | TWNK        | -1.06 | 0.00 |
| 2097 | TXLNA       | -0.51 | 0.00 |

|      |            |       |      |
|------|------------|-------|------|
| 2098 | TYROBP     | -1.16 | 0.00 |
| 2099 | U2AF1L4    | -0.72 | 0.00 |
| 2100 | U2AF2      | -0.64 | 0.00 |
| 2101 | UBA52      | -1.05 | 0.00 |
| 2102 | UBA7       | -0.80 | 0.00 |
| 2103 | UBALD2     | -1.54 | 0.00 |
| 2104 | UBE2L3     | -0.74 | 0.00 |
| 2105 | UBE2M      | -0.70 | 0.00 |
| 2106 | UBE2Q1     | -0.63 | 0.00 |
| 2107 | UBE3C      | 0.58  | 0.00 |
| 2108 | UBE4B      | 0.32  | 0.01 |
| 2109 | UBL5       | -0.98 | 0.01 |
| 2110 | UBL7       | -0.89 | 0.00 |
| 2111 | UBQLN3     | 1.40  | 0.00 |
| 2112 | UBR3       | 0.58  | 0.00 |
| 2113 | UBTF       | -0.38 | 0.00 |
| 2114 | UBXN1      | -1.09 | 0.00 |
| 2115 | UGGT2      | 0.74  | 0.00 |
| 2116 | UNC119     | -0.82 | 0.01 |
| 2117 | UQCR10     | -0.88 | 0.01 |
| 2118 | UQCR11     | -1.64 | 0.00 |
| 2119 | URB1-AS1   | -1.11 | 0.00 |
| 2120 | UROD       | -0.55 | 0.01 |
| 2121 | USE1       | -0.67 | 0.00 |
| 2122 | USF2       | -0.73 | 0.00 |
| 2123 | USP27X     | -0.49 | 0.00 |
| 2124 | USP27X-AS1 | -1.17 | 0.00 |
| 2125 | USP34      | 0.57  | 0.00 |
| 2126 | USP50      | 0.92  | 0.00 |
| 2127 | USP7       | 0.38  | 0.00 |
| 2128 | USP9X      | 0.53  | 0.00 |
| 2129 | UTP3       | -0.49 | 0.00 |
| 2130 | UXT        | -0.75 | 0.00 |
| 2131 | VAMP5      | -1.35 | 0.00 |
| 2132 | VILL       | -0.83 | 0.01 |
| 2133 | VMO1       | -1.99 | 0.00 |
| 2134 | VMP1       | 0.64  | 0.01 |
| 2135 | VPS11      | -0.65 | 0.00 |
| 2136 | VPS11      | -0.65 | 0.00 |
| 2137 | VPS28      | -1.01 | 0.00 |
| 2138 | VPS36      | 0.59  | 0.00 |
| 2139 | VPS8       | 0.65  | 0.00 |
| 2140 | VSIG2      | -2.12 | 0.00 |
| 2141 | VTI1B      | -0.59 | 0.00 |
| 2142 | WDFY2      | 0.71  | 0.00 |
| 2143 | WDR34      | -0.95 | 0.01 |
| 2144 | WDR45      | -0.79 | 0.00 |
| 2145 | WDR54      | -0.68 | 0.01 |
| 2146 | WDR59      | 0.52  | 0.00 |
| 2147 | WDR6       | -0.62 | 0.01 |

|      |            |       |      |
|------|------------|-------|------|
| 2148 | WDR72      | 0.89  | 0.00 |
| 2149 | WDR77      | -0.75 | 0.00 |
| 2150 | WDR83      | -0.61 | 0.00 |
| 2151 | WDR83OS    | -0.86 | 0.01 |
| 2152 | WDTC1      | -0.45 | 0.00 |
| 2153 | WEE1       | 0.57  | 0.00 |
| 2154 | WFDC2      | -2.06 | 0.00 |
| 2155 | WRAP53     | -1.04 | 0.00 |
| 2156 | WT1        | -2.32 | 0.00 |
| 2157 | WTIP       | -0.99 | 0.00 |
| 2158 | XCL1       | -1.57 | 0.00 |
| 2159 | XYLT2      | -0.91 | 0.00 |
| 2160 | YAF2       | 0.60  | 0.00 |
| 2161 | YDJC       | -1.16 | 0.00 |
| 2162 | YIF1B      | -0.94 | 0.00 |
| 2163 | YIPF3      | -0.88 | 0.00 |
| 2164 | YLPM1      | 0.57  | 0.00 |
| 2165 | YPEL4      | -1.25 | 0.01 |
| 2166 | YTHDF3-AS1 | -1.45 | 0.00 |
| 2167 | ZBED5-AS1  | -0.76 | 0.01 |
| 2168 | ZBTB2      | -1.00 | 0.00 |
| 2169 | ZBTB4      | -0.64 | 0.00 |
| 2170 | ZBTB4      | -0.64 | 0.00 |
| 2171 | ZBTB47     | -1.13 | 0.00 |
| 2172 | ZC3H10     | -0.82 | 0.00 |
| 2173 | ZC3H4      | -0.37 | 0.00 |
| 2174 | ZC3H7A     | 0.52  | 0.00 |
| 2175 | ZCCHC7     | 0.55  | 0.00 |
| 2176 | ZCCHC8     | 0.31  | 0.01 |
| 2177 | ZDHHC15    | 0.49  | 0.01 |
| 2178 | ZDHHC21    | 0.93  | 0.00 |
| 2179 | ZFAND2A    | -0.62 | 0.01 |
| 2180 | ZFAND2B    | -0.77 | 0.00 |
| 2181 | ZFC3H1     | 0.60  | 0.00 |
| 2182 | ZFP3       | -0.44 | 0.00 |
| 2183 | ZFPL1      | -0.77 | 0.00 |
| 2184 | ZFYVE1     | -0.37 | 0.00 |
| 2185 | ZIM2       | -2.21 | 0.00 |
| 2186 | ZMAT5      | -0.81 | 0.01 |
| 2187 | ZMYM2      | 0.50  | 0.01 |
| 2188 | ZNF142     | -0.37 | 0.00 |
| 2189 | ZNF18      | -0.36 | 0.00 |
| 2190 | ZNF292     | 0.60  | 0.00 |
| 2191 | ZNF324     | -0.64 | 0.00 |
| 2192 | ZNF324B    | -0.59 | 0.00 |
| 2193 | ZNF335     | -0.49 | 0.00 |
| 2194 | ZNF384     | -0.62 | 0.00 |
| 2195 | ZNF385B    | -2.05 | 0.00 |
| 2196 | ZNF394     | -0.37 | 0.00 |
| 2197 | ZNF404     | 0.63  | 0.00 |

|      |            |       |      |
|------|------------|-------|------|
| 2198 | ZNF430     | 0.62  | 0.00 |
| 2199 | ZNF436-AS1 | -0.81 | 0.00 |
| 2200 | ZNF513     | -0.67 | 0.00 |
| 2201 | ZNF524     | -1.21 | 0.00 |
| 2202 | ZNF526     | -0.44 | 0.01 |
| 2203 | ZNF574     | -0.66 | 0.00 |
| 2204 | ZNF576     | -0.76 | 0.00 |
| 2205 | ZNF580     | -0.91 | 0.00 |
| 2206 | ZNF619     | -0.47 | 0.00 |
| 2207 | ZNF629     | -0.68 | 0.00 |
| 2208 | ZNF638     | 0.53  | 0.00 |
| 2209 | ZNF646     | -0.69 | 0.00 |
| 2210 | ZNF672     | -0.60 | 0.00 |
| 2211 | ZNF687     | -0.65 | 0.00 |
| 2212 | ZNF688     | -0.56 | 0.00 |
| 2213 | ZNF705E    | 0.85  | 0.00 |
| 2214 | ZNF747     | -0.72 | 0.00 |
| 2215 | ZNF768     | -0.82 | 0.00 |
| 2216 | ZNF830     | -0.60 | 0.00 |
| 2217 | ZNF853     | -1.34 | 0.00 |
| 2218 | ZNRD2      | -0.95 | 0.00 |
| 2219 | ZPBP2      | 0.72  | 0.00 |
| 2220 | ZPLD1      | 3.35  | 0.00 |
| 2221 | ZPR1       | -0.61 | 0.00 |
| 2222 | ZSCAN22    | -0.53 | 0.00 |



**Table S3: Differentially expressed genes upon progesterone treatment to T47D (PR+/ER+/Her2-) cell line**

| S.No. | Gene              | Log2FoldChange | P-value |
|-------|-------------------|----------------|---------|
| 1     | <i>AC012358.8</i> | 1.34           | 0.02    |
| 2     | <i>AC093323.3</i> | 1.23           | 0.00    |
| 3     | <i>ACACB</i>      | -1.43          | 0.04    |
| 4     | <i>ACER2</i>      | 1.55           | 0.00    |
| 5     | <i>ACHE</i>       | -1.64          | 0.04    |
| 6     | <i>ACSL1</i>      | 0.94           | 0.00    |
| 7     | <i>ACSM2B</i>     | -2.09          | 0.04    |
| 8     | <i>ACSS1</i>      | 0.81           | 0.01    |
| 9     | <i>ADD3</i>       | 0.99           | 0.03    |
| 10    | <i>ADGB</i>       | -3.80          | 0.05    |
| 11    | <i>ADRA1A</i>     | -2.81          | 0.00    |
| 12    | <i>AGR3</i>       | 0.84           | 0.03    |
| 13    | <i>AMIGO2</i>     | -1.68          | 0.00    |
| 14    | <i>ANKRD22</i>    | 1.15           | 0.00    |
| 15    | <i>ANKRD35</i>    | 3.31           | 0.00    |
| 16    | <i>ANKS6</i>      | -2.57          | 0.03    |
| 17    | <i>ANO6</i>       | 0.79           | 0.02    |
| 18    | <i>ANPEP</i>      | -2.29          | 0.03    |
| 19    | <i>APOL3</i>      | -2.79          | 0.00    |
| 20    | <i>APOL4</i>      | -2.62          | 0.03    |
| 21    | <i>AQP3</i>       | 0.94           | 0.03    |
| 22    | <i>ARHGEF26</i>   | 1.62           | 0.00    |
| 23    | <i>ARL4C</i>      | 1.59           | 0.01    |
| 24    | <i>ARL4D</i>      | 2.10           | 0.00    |
| 25    | <i>ARRB1</i>      | 0.97           | 0.00    |
| 26    | <i>ATAD2</i>      | 1.68           | 0.00    |
| 27    | <i>ATP10A</i>     | 1.41           | 0.00    |
| 28    | <i>ATP1A1</i>     | 1.22           | 0.00    |
| 29    | <i>ATP1B1</i>     | 1.46           | 0.00    |
| 30    | <i>AZGP1</i>      | 1.16           | 0.00    |
| 31    | <i>B4GALT1</i>    | 0.73           | 0.02    |
| 32    | <i>BAMBI</i>      | -0.91          | 0.01    |
| 33    | <i>BCL11A</i>     | -2.74          | 0.01    |
| 34    | <i>BCL6</i>       | 1.22           | 0.00    |
| 35    | <i>BNIP3</i>      | 0.83           | 0.03    |
| 36    | <i>C10orf12</i>   | 0.85           | 0.01    |
| 37    | <i>C6orf141</i>   | -0.95          | 0.01    |
| 38    | <i>C9orf152</i>   | 1.58           | 0.00    |
| 39    | <i>CADPS</i>      | -3.15          | 0.01    |
| 40    | <i>CAMKK2</i>     | 0.69           | 0.03    |
| 41    | <i>CASC10</i>     | 1.34           | 0.04    |
| 42    | <i>CASD1</i>      | 0.93           | 0.03    |
| 43    | <i>CASP7</i>      | 1.13           | 0.00    |
| 44    | <i>CBX4</i>       | 0.66           | 0.04    |
| 45    | <i>CD163</i>      | -2.41          | 0.03    |
| 46    | <i>CD209</i>      | -3.02          | 0.01    |
| 47    | <i>CDC42EP3</i>   | 1.36           | 0.00    |
| 48    | <i>CDH13</i>      | -1.45          | 0.04    |
| 49    | <i>CDHR1</i>      | -2.72          | 0.04    |



|     |                    |       |      |
|-----|--------------------|-------|------|
| 50  | <i>CEBPD</i>       | 2.07  | 0.00 |
| 51  | <i>CHPT1</i>       | 0.99  | 0.00 |
| 52  | <i>CHRNA4</i>      | -4.67 | 0.01 |
| 53  | <i>CLDN8</i>       | 1.96  | 0.02 |
| 54  | <i>CLEC4M</i>      | -4.07 | 0.00 |
| 55  | <i>CLIC6</i>       | 0.98  | 0.00 |
| 56  | <i>CLMN</i>        | 1.01  | 0.01 |
| 57  | <i>CNN1</i>        | -2.53 | 0.05 |
| 58  | <i>CNTNAP3</i>     | -3.03 | 0.03 |
| 59  | <i>COPZ2</i>       | 1.32  | 0.04 |
| 60  | <i>CORO2A</i>      | 1.15  | 0.00 |
| 61  | <i>CRB1</i>        | -3.36 | 0.04 |
| 62  | <i>CREB3L2</i>     | 0.96  | 0.01 |
| 63  | <i>CSH1</i>        | -3.76 | 0.04 |
| 64  | <i>CSH2</i>        | -3.88 | 0.00 |
| 65  | <i>CSRNP1</i>      | 1.24  | 0.00 |
| 66  | <i>CTB-92J24.3</i> | 1.96  | 0.03 |
| 67  | <i>CTNNA2</i>      | -2.34 | 0.03 |
| 68  | <i>CTTNBP2NL</i>   | 1.03  | 0.02 |
| 69  | <i>CXCL12</i>      | -0.81 | 0.02 |
| 70  | <i>CXCR4</i>       | -1.68 | 0.00 |
| 71  | <i>CYP4A11</i>     | -3.95 | 0.02 |
| 72  | <i>CYP4F3</i>      | -2.32 | 0.01 |
| 73  | <i>DBI</i>         | 0.76  | 0.01 |
| 74  | <i>DCC</i>         | -3.62 | 0.01 |
| 75  | <i>DCLK2</i>       | -1.60 | 0.01 |
| 76  | <i>DENND1B</i>     | 0.81  | 0.04 |
| 77  | <i>DESI2</i>       | 0.99  | 0.02 |
| 78  | <i>DFNB31</i>      | 1.19  | 0.00 |
| 79  | <i>DGKH</i>        | 1.12  | 0.03 |
| 80  | <i>DIXDC1</i>      | 1.05  | 0.00 |
| 81  | <i>DLGAP1</i>      | -3.02 | 0.01 |
| 82  | <i>DLGAP2</i>      | -3.30 | 0.05 |
| 83  | <i>DLX3</i>        | 0.83  | 0.03 |
| 84  | <i>DMBT1</i>       | -2.61 | 0.01 |
| 85  | <i>DNAJB4</i>      | 1.04  | 0.02 |
| 86  | <i>DPCR1</i>       | -1.90 | 0.04 |
| 87  | <i>DPF3</i>        | -2.14 | 0.05 |
| 88  | <i>DPP10</i>       | -4.62 | 0.00 |
| 89  | <i>DSCAM-AS1</i>   | -0.85 | 0.02 |
| 90  | <i>DSPP</i>        | -2.64 | 0.01 |
| 91  | <i>DUSP1</i>       | 1.17  | 0.00 |
| 92  | <i>DUSP19</i>      | -1.47 | 0.04 |
| 93  | <i>EAF2</i>        | 2.66  | 0.01 |
| 94  | <i>EFHD1</i>       | 0.81  | 0.04 |
| 95  | <i>EGF</i>         | 1.21  | 0.01 |
| 96  | <i>ELMO1</i>       | -2.91 | 0.01 |
| 97  | <i>EMP2</i>        | 0.87  | 0.01 |
| 98  | <i>ENPP1</i>       | 1.32  | 0.00 |
| 99  | <i>EPGN</i>        | 2.36  | 0.02 |
| 100 | <i>EPHB1</i>       | -4.13 | 0.02 |
| 101 | <i>ERC2</i>        | -4.56 | 0.00 |

|     |                 |       |      |
|-----|-----------------|-------|------|
| 102 | <i>ERRFI1</i>   | 1.68  | 0.00 |
| 103 | <i>EXOC3L4</i>  | -2.96 | 0.04 |
| 104 | <i>EZR</i>      | 0.64  | 0.05 |
| 105 | <i>F3</i>       | 2.76  | 0.00 |
| 106 | <i>FADS6</i>    | -2.93 | 0.05 |
| 107 | <i>FAM102B</i>  | 0.93  | 0.01 |
| 108 | <i>FAM107B</i>  | 1.80  | 0.00 |
| 109 | <i>FAM46C</i>   | 0.97  | 0.01 |
| 110 | <i>FAM81A</i>   | -2.58 | 0.02 |
| 111 | <i>FAM86B1</i>  | -2.07 | 0.02 |
| 112 | <i>FEM1C</i>    | 0.76  | 0.02 |
| 113 | <i>FGD4</i>     | 1.21  | 0.00 |
| 114 | <i>FGFBP2</i>   | -1.82 | 0.05 |
| 115 | <i>FKBP5</i>    | 2.24  | 0.00 |
| 116 | <i>FLG</i>      | -3.24 | 0.00 |
| 117 | <i>FLRT3</i>    | 1.45  | 0.02 |
| 118 | <i>FRK</i>      | 1.55  | 0.00 |
| 119 | <i>FZD5</i>     | 0.98  | 0.01 |
| 120 | <i>GADD45B</i>  | 1.21  | 0.00 |
| 121 | <i>GCH1</i>     | 0.75  | 0.03 |
| 122 | <i>GFAP</i>     | -2.12 | 0.03 |
| 123 | <i>GJA1</i>     | 2.52  | 0.00 |
| 124 | <i>GJB2</i>     | 1.73  | 0.04 |
| 125 | <i>GLUL</i>     | 1.29  | 0.01 |
| 126 | <i>GNA12</i>    | 0.99  | 0.03 |
| 127 | <i>GNAO1</i>    | -2.76 | 0.03 |
| 128 | <i>GNPTAB</i>   | 1.10  | 0.00 |
| 129 | <i>GOLGA6L4</i> | -1.99 | 0.01 |
| 130 | <i>GOLGA8B</i>  | 2.20  | 0.01 |
| 131 | <i>GPR153</i>   | 0.92  | 0.05 |
| 132 | <i>GPSM2</i>    | 1.19  | 0.03 |
| 133 | <i>GRASP</i>    | -3.28 | 0.04 |
| 134 | <i>GRHL2</i>    | 1.02  | 0.00 |
| 135 | <i>GRIA3</i>    | -5.04 | 0.02 |
| 136 | <i>GRIK4</i>    | 2.48  | 0.03 |
| 137 | <i>GRPR</i>     | -1.09 | 0.00 |
| 138 | <i>GTF2A1L</i>  | -1.00 | 0.04 |
| 139 | <i>HAL</i>      | -4.80 | 0.02 |
| 140 | <i>HDAC9</i>    | -1.85 | 0.02 |
| 141 | <i>HERC5</i>    | 0.91  | 0.01 |
| 142 | <i>HIF3A</i>    | -2.66 | 0.01 |
| 143 | <i>HILPDA</i>   | 1.49  | 0.00 |
| 144 | <i>HK2</i>      | 0.80  | 0.02 |
| 145 | <i>HMGCS2</i>   | 0.94  | 0.02 |
| 146 | <i>HNRNPCL1</i> | -3.85 | 0.03 |
| 147 | <i>HP</i>       | -3.09 | 0.01 |
| 148 | <i>HPGD</i>     | 1.98  | 0.02 |
| 149 | <i>HR</i>       | -0.95 | 0.01 |
| 150 | <i>HRNR</i>     | -2.87 | 0.00 |
| 151 | <i>IER5L</i>    | 0.82  | 0.04 |
| 152 | <i>IFI44L</i>   | -2.66 | 0.03 |
| 153 | <i>IFRD1</i>    | 1.11  | 0.00 |

|     |                  |       |      |
|-----|------------------|-------|------|
| 154 | <i>IGFBP5</i>    | -0.82 | 0.02 |
| 155 | <i>IL2ORA</i>    | 1.52  | 0.00 |
| 156 | <i>IL6R</i>      | 0.89  | 0.03 |
| 157 | <i>IL6ST</i>     | 1.49  | 0.02 |
| 158 | <i>IQCA1</i>     | -3.09 | 0.04 |
| 159 | <i>IQCF3</i>     | -2.69 | 0.03 |
| 160 | <i>IRF2BPL</i>   | -0.69 | 0.04 |
| 161 | <i>ITGA10</i>    | 0.93  | 0.04 |
| 162 | <i>ITPKB</i>     | 1.24  | 0.00 |
| 163 | <i>KANK1</i>     | 1.41  | 0.00 |
| 164 | <i>KCNC4</i>     | 2.16  | 0.01 |
| 165 | <i>KCNH1</i>     | 1.60  | 0.02 |
| 166 | <i>KCNJ11</i>    | 1.26  | 0.00 |
| 167 | <i>KCNK5</i>     | -1.81 | 0.01 |
| 168 | <i>KCNMA1</i>    | 1.14  | 0.04 |
| 169 | <i>KDM4B</i>     | 0.99  | 0.00 |
| 170 | <i>KIAA0040</i>  | 0.83  | 0.02 |
| 171 | <i>KIAA0232</i>  | 0.94  | 0.01 |
| 172 | <i>KLF15</i>     | 1.18  | 0.02 |
| 173 | <i>KLF4</i>      | 1.40  | 0.00 |
| 174 | <i>KLF9</i>      | 1.52  | 0.00 |
| 175 | <i>KLK2</i>      | -2.73 | 0.00 |
| 176 | <i>LAIR1</i>     | -2.72 | 0.00 |
| 177 | <i>LAMA3</i>     | 1.27  | 0.02 |
| 178 | <i>LAMB3</i>     | -0.81 | 0.04 |
| 179 | <i>LCN8</i>      | -3.39 | 0.05 |
| 180 | <i>LEF1</i>      | 1.72  | 0.01 |
| 181 | <i>LGALS9C</i>   | -5.27 | 0.00 |
| 182 | <i>LGI4</i>      | -1.86 | 0.04 |
| 183 | <i>LILRA1</i>    | -4.05 | 0.00 |
| 184 | <i>LILRA4</i>    | -5.78 | 0.02 |
| 185 | <i>LILRB1</i>    | -3.29 | 0.01 |
| 186 | <i>LILRB4</i>    | -3.01 | 0.03 |
| 187 | <i>LIMA1</i>     | 0.66  | 0.04 |
| 188 | <i>LINC01137</i> | 0.95  | 0.05 |
| 189 | <i>LRIG3</i>     | 1.28  | 0.00 |
| 190 | <i>LRRC31</i>    | 2.51  | 0.00 |
| 191 | <i>LRRTM4</i>    | -4.96 | 0.04 |
| 192 | <i>LSP1</i>      | -3.73 | 0.00 |
| 193 | <i>MAFB</i>      | 1.58  | 0.00 |
| 194 | <i>MAN1A1</i>    | 1.82  | 0.00 |
| 195 | <i>MAN2A1</i>    | 0.70  | 0.03 |
| 196 | <i>MAT2A</i>     | 0.82  | 0.03 |
| 197 | <i>MBNL1</i>     | 0.83  | 0.05 |
| 198 | <i>MCL1</i>      | 0.91  | 0.01 |
| 199 | <i>MEFV</i>      | -2.45 | 0.01 |
| 200 | <i>MKX</i>       | -1.12 | 0.04 |
| 201 | <i>MMP15</i>     | 0.81  | 0.04 |
| 202 | <i>MPHOSPH10</i> | 1.14  | 0.00 |
| 203 | <i>MRFAP1</i>    | 0.79  | 0.01 |
| 204 | <i>MTCL1</i>     | 1.34  | 0.01 |
| 205 | <i>MTMR9</i>     | 1.40  | 0.00 |

|     |                   |       |      |
|-----|-------------------|-------|------|
| 206 | <i>MUC12</i>      | -2.40 | 0.03 |
| 207 | <i>MUC17</i>      | -3.37 | 0.05 |
| 208 | <i>MUC2</i>       | -2.69 | 0.02 |
| 209 | <i>MUC22</i>      | -2.22 | 0.04 |
| 210 | <i>MYB</i>        | -0.97 | 0.02 |
| 211 | <i>MYBL1</i>      | 1.10  | 0.00 |
| 212 | <i>MYBPC1</i>     | 2.49  | 0.00 |
| 213 | <i>MYO1A</i>      | -2.87 | 0.00 |
| 214 | <i>MYOM1</i>      | -4.83 | 0.04 |
| 215 | <i>NADK2</i>      | 0.83  | 0.03 |
| 216 | <i>NAMPT</i>      | 1.10  | 0.01 |
| 217 | <i>NAP1L4</i>     | 0.83  | 0.03 |
| 218 | <i>NBEA</i>       | 1.29  | 0.01 |
| 219 | <i>NBPF14</i>     | 1.20  | 0.02 |
| 220 | <i>NBPF19</i>     | 1.63  | 0.00 |
| 221 | <i>NBPF9</i>      | 1.16  | 0.00 |
| 222 | <i>NEDD9</i>      | 1.52  | 0.00 |
| 223 | <i>NET1</i>       | 1.54  | 0.00 |
| 224 | <i>NETO2</i>      | 2.05  | 0.01 |
| 225 | <i>NFIL3</i>      | 0.95  | 0.03 |
| 226 | <i>NFKBIA</i>     | 1.08  | 0.00 |
| 227 | <i>NKX2-1</i>     | -3.44 | 0.00 |
| 228 | <i>NLRP3</i>      | -3.46 | 0.01 |
| 229 | <i>NOL4</i>       | -2.56 | 0.02 |
| 230 | <i>NOTCH2</i>     | 1.05  | 0.01 |
| 231 | <i>NPC1</i>       | 0.77  | 0.05 |
| 232 | <i>NPIPB11</i>    | -1.89 | 0.02 |
| 233 | <i>NRG1</i>       | -2.33 | 0.01 |
| 234 | <i>NRXN3</i>      | -3.06 | 0.01 |
| 235 | <i>NTM</i>        | -2.83 | 0.01 |
| 236 | <i>NUDT18</i>     | -0.91 | 0.02 |
| 237 | <i>OPRD1</i>      | -1.39 | 0.05 |
| 238 | <i>PACSIN1</i>    | 1.00  | 0.01 |
| 239 | <i>PAG1</i>       | 1.35  | 0.05 |
| 240 | <i>PARP14</i>     | 1.02  | 0.00 |
| 241 | <i>PARP9</i>      | 1.01  | 0.02 |
| 242 | <i>PCDH18</i>     | -2.11 | 0.01 |
| 243 | <i>PCED1B-AS1</i> | -2.75 | 0.03 |
| 244 | <i>PDK4</i>       | 1.79  | 0.01 |
| 245 | <i>PEG3</i>       | -3.26 | 0.00 |
| 246 | <i>PFKFB3</i>     | 0.82  | 0.02 |
| 247 | <i>PGA3</i>       | -3.60 | 0.02 |
| 248 | <i>PHF8</i>       | 0.70  | 0.05 |
| 249 | <i>PHYHIP</i>     | -3.91 | 0.03 |
| 250 | <i>PIAS3</i>      | 0.79  | 0.03 |
| 251 | <i>PIK3R1</i>     | 0.78  | 0.03 |
| 252 | <i>PISD</i>       | 1.35  | 0.01 |
| 253 | <i>PKDCC</i>      | -2.21 | 0.04 |
| 254 | <i>PLA2G3</i>     | 1.24  | 0.01 |
| 255 | <i>PLA2G4C</i>    | 1.60  | 0.04 |
| 256 | <i>PLEKHD1</i>    | 1.60  | 0.00 |
| 257 | <i>PLEKHF1</i>    | 1.04  | 0.01 |

|     |                      |       |      |
|-----|----------------------|-------|------|
| 258 | <i>PLEKHF2</i>       | 0.83  | 0.02 |
| 259 | <i>PLEKHG2</i>       | 1.27  | 0.04 |
| 260 | <i>PNN</i>           | 0.69  | 0.04 |
| 261 | <i>POU2AF1</i>       | -3.61 | 0.01 |
| 262 | <i>PPL</i>           | 1.24  | 0.02 |
| 263 | <i>PPP1R14C</i>      | 2.91  | 0.04 |
| 264 | <i>PPP1R36</i>       | -2.34 | 0.04 |
| 265 | <i>PRDM1</i>         | 1.91  | 0.03 |
| 266 | <i>PRR15</i>         | 0.76  | 0.02 |
| 267 | <i>PRR15L</i>        | 1.25  | 0.02 |
| 268 | <i>PSG1</i>          | -3.96 | 0.01 |
| 269 | <i>PSG11</i>         | -2.92 | 0.02 |
| 270 | <i>PSG2</i>          | -3.23 | 0.00 |
| 271 | <i>PSG4</i>          | -3.68 | 0.00 |
| 272 | <i>PSG5</i>          | -5.10 | 0.01 |
| 273 | <i>PSG8</i>          | -2.26 | 0.04 |
| 274 | <i>PTHLH</i>         | -1.68 | 0.04 |
| 275 | <i>PTPRJ</i>         | 0.79  | 0.01 |
| 276 | <i>RAB3B</i>         | 2.79  | 0.01 |
| 277 | <i>RANBP3L</i>       | 3.89  | 0.00 |
| 278 | <i>RASA2</i>         | 0.99  | 0.04 |
| 279 | <i>RBBP7</i>         | 0.74  | 0.04 |
| 280 | <i>RBBP8NL</i>       | -0.94 | 0.02 |
| 281 | <i>RBFOX1</i>        | -2.96 | 0.01 |
| 282 | <i>RBM24</i>         | 0.96  | 0.01 |
| 283 | <i>RCAN1</i>         | 1.48  | 0.00 |
| 284 | <i>RGSL1</i>         | -3.21 | 0.00 |
| 285 | <i>RIMS1</i>         | -1.38 | 0.02 |
| 286 | <i>RP11-175O19.4</i> | 1.03  | 0.01 |
| 287 | <i>RP11-21L23.2</i>  | 0.98  | 0.02 |
| 288 | <i>RP11-34P13.8</i>  | 1.83  | 0.01 |
| 289 | <i>RP11-363E7.4</i>  | 1.18  | 0.01 |
| 290 | <i>RP11-367J11.2</i> | 1.05  | 0.04 |
| 291 | <i>RP11-73M7.6</i>   | -2.88 | 0.00 |
| 292 | <i>RPF2</i>          | 0.77  | 0.04 |
| 293 | <i>RPH3AL</i>        | 1.57  | 0.03 |
| 294 | <i>RPS6KA1</i>       | 0.73  | 0.02 |
| 295 | <i>RPS6KA5</i>       | 1.53  | 0.02 |
| 296 | <i>RRS1-AS1</i>      | 1.16  | 0.03 |
| 297 | <i>RUNX1</i>         | 1.25  | 0.00 |
| 298 | <i>S100P</i>         | 1.42  | 0.01 |
| 299 | <i>SAMD3</i>         | 1.93  | 0.03 |
| 300 | <i>SASH1</i>         | 1.29  | 0.00 |
| 301 | <i>SAT1</i>          | 1.24  | 0.00 |
| 302 | <i>SCNN1G</i>        | 2.25  | 0.01 |
| 303 | <i>SCUBE2</i>        | 1.57  | 0.00 |
| 304 | <i>SEC62</i>         | 0.92  | 0.01 |
| 305 | <i>SEMA6A</i>        | -1.09 | 0.01 |
| 306 | <i>SERINC5</i>       | 1.09  | 0.01 |
| 307 | <i>SETD7</i>         | 0.77  | 0.02 |
| 308 | <i>SGK1</i>          | 3.02  | 0.00 |
| 309 | <i>SHISA2</i>        | -0.95 | 0.01 |

|     |                  |       |      |
|-----|------------------|-------|------|
| 310 | <i>SHROOM2</i>   | -0.85 | 0.03 |
| 311 | <i>SIM2</i>      | 1.17  | 0.01 |
| 312 | <i>SLAIN1</i>    | -2.58 | 0.03 |
| 313 | <i>SLC22A15</i>  | 1.71  | 0.02 |
| 314 | <i>SLC22A23</i>  | 1.59  | 0.00 |
| 315 | <i>SLC25A17</i>  | 0.85  | 0.02 |
| 316 | <i>SLC25A18</i>  | 2.01  | 0.00 |
| 317 | <i>SLC34A1</i>   | -3.54 | 0.05 |
| 318 | <i>SLC6A13</i>   | -2.73 | 0.02 |
| 319 | <i>SLC7A7</i>    | -2.02 | 0.02 |
| 320 | <i>SLX1A</i>     | -1.89 | 0.01 |
| 321 | <i>SOCS3</i>     | -1.45 | 0.05 |
| 322 | <i>SOWAHA</i>    | 0.74  | 0.04 |
| 323 | <i>SOX4</i>      | 0.88  | 0.01 |
| 324 | <i>SPATA31A6</i> | -3.55 | 0.02 |
| 325 | <i>SPATA31C1</i> | -3.86 | 0.01 |
| 326 | <i>SPRED2</i>    | 1.43  | 0.00 |
| 327 | <i>SRGAP2</i>    | 1.00  | 0.00 |
| 328 | <i>SRM</i>       | 0.79  | 0.04 |
| 329 | <i>ST3GAL4</i>   | 1.38  | 0.00 |
| 330 | <i>ST8SIA5</i>   | -7.24 | 0.01 |
| 331 | <i>STEAP2</i>    | 0.93  | 0.03 |
| 332 | <i>STOM</i>      | 1.13  | 0.00 |
| 333 | <i>STRA6</i>     | -3.10 | 0.00 |
| 334 | <i>SYBU</i>      | 3.02  | 0.00 |
| 335 | <i>TBC1D4</i>    | 1.08  | 0.00 |
| 336 | <i>TCAF2</i>     | 1.12  | 0.01 |
| 337 | <i>TCEB3</i>     | 0.81  | 0.02 |
| 338 | <i>TCF7L2</i>    | -1.66 | 0.00 |
| 339 | <i>TCHH</i>      | -1.52 | 0.03 |
| 340 | <i>TECTA</i>     | -3.29 | 0.01 |
| 341 | <i>TES</i>       | -2.62 | 0.02 |
| 342 | <i>TEX35</i>     | -1.51 | 0.05 |
| 343 | <i>TGFA</i>      | 0.76  | 0.04 |
| 344 | <i>TGFB1I1</i>   | -2.07 | 0.04 |
| 345 | <i>THBS1</i>     | 1.27  | 0.00 |
| 346 | <i>TIPARP</i>    | 0.96  | 0.01 |
| 347 | <i>TMEM191C</i>  | -1.51 | 0.04 |
| 348 | <i>TMTC2</i>     | 0.87  | 0.02 |
| 349 | <i>TNFRSF10A</i> | 0.99  | 0.04 |
| 350 | <i>TNFSF15</i>   | -1.19 | 0.05 |
| 351 | <i>TNS3</i>      | 1.23  | 0.00 |
| 352 | <i>TPPP2</i>     | -1.90 | 0.04 |
| 353 | <i>TRIML2</i>    | -3.84 | 0.02 |
| 354 | <i>TSC22D1</i>   | 0.87  | 0.02 |
| 355 | <i>TSC22D3</i>   | 1.54  | 0.00 |
| 356 | <i>TSKU</i>      | 0.68  | 0.03 |
| 357 | <i>TTC39B</i>    | 1.05  | 0.01 |
| 358 | <i>UGT1A1</i>    | -2.90 | 0.00 |
| 359 | <i>ULK2</i>      | 0.74  | 0.05 |
| 360 | <i>VCX</i>       | -3.42 | 0.03 |
| 361 | <i>VDR</i>       | 0.99  | 0.00 |

|     |                |       |      |
|-----|----------------|-------|------|
| 362 | <i>WWC1</i>    | 0.96  | 0.01 |
| 363 | <i>XYLT1</i>   | -2.31 | 0.03 |
| 364 | <i>ZBTB10</i>  | 0.93  | 0.01 |
| 365 | <i>ZBTB7C</i>  | 2.06  | 0.00 |
| 366 | <i>ZC3H12A</i> | 0.98  | 0.03 |
| 367 | <i>ZCCHC6</i>  | 0.82  | 0.02 |
| 368 | <i>ZEB2</i>    | -1.48 | 0.03 |
| 369 | <i>ZIC4</i>    | -3.42 | 0.02 |
| 370 | <i>ZNF423</i>  | -3.28 | 0.02 |
| 371 | <i>ZNF474</i>  | -3.39 | 0.02 |
| 372 | <i>ZNF521</i>  | -3.68 | 0.01 |
| 373 | <i>ZNF652</i>  | 1.30  | 0.00 |
| 374 | <i>ZNF812</i>  | 1.90  | 0.00 |

**Table S4: Differentially expressed genes upon progesterone treatment to MDA-MB-231 (PR-/ER-/Her2-) cell line**

| S.No. | Gene             | Log2FoldChange | P-value |
|-------|------------------|----------------|---------|
| 1     | <i>ABCB1</i>     | -3.97          | 0.02    |
| 2     | <i>ABCC8</i>     | -5.47          | 0.00    |
| 3     | <i>ACSL6</i>     | -1.77          | 0.03    |
| 4     | <i>ADAMTS2</i>   | -4.49          | 0.03    |
| 5     | <i>ADORA3</i>    | -3.84          | 0.01    |
| 6     | <i>ADRA1A</i>    | -2.10          | 0.02    |
| 7     | <i>ALDH3A1</i>   | -3.17          | 0.00    |
| 8     | <i>ANKRD20A2</i> | -2.36          | 0.01    |
| 9     | <i>ARHGAP15</i>  | -2.76          | 0.05    |
| 10    | <i>ARHGAP8</i>   | -1.53          | 0.03    |
| 11    | <i>ASB2</i>      | 0.60           | 0.02    |
| 12    | <i>B3GNT3</i>    | -1.48          | 0.03    |
| 13    | <i>BCAS3</i>     | 0.71           | 0.03    |
| 14    | <i>BORCS5</i>    | -1.11          | 0.04    |
| 15    | <i>C10orf11</i>  | -3.54          | 0.01    |
| 16    | <i>C15orf57</i>  | -0.99          | 0.01    |
| 17    | <i>C1QTNF5</i>   | -3.60          | 0.02    |
| 18    | <i>CACNA1A</i>   | -3.76          | 0.00    |
| 19    | <i>CADPS</i>     | -2.36          | 0.05    |
| 20    | <i>CAPN8</i>     | -2.48          | 0.04    |
| 21    | <i>CCNB3</i>     | -2.05          | 0.03    |
| 22    | <i>CD4</i>       | -3.72          | 0.00    |
| 23    | <i>CD6</i>       | -3.11          | 0.03    |
| 24    | <i>CDH11</i>     | -2.01          | 0.03    |
| 25    | <i>CDKN2A</i>    | -1.77          | 0.05    |
| 26    | <i>CELF4</i>     | -1.85          | 0.02    |
| 27    | <i>CERKL</i>     | -1.63          | 0.02    |
| 28    | <i>CFAP61</i>    | -2.36          | 0.01    |
| 29    | <i>CHIT1</i>     | -5.93          | 0.02    |
| 30    | <i>CHRD</i>      | -4.18          | 0.04    |
| 31    | <i>CHRNA2</i>    | -3.50          | 0.01    |
| 32    | <i>CHRNA3</i>    | -2.62          | 0.04    |
| 33    | <i>CHRNA4</i>    | -7.57          | 0.01    |
| 34    | <i>CKMT1B</i>    | -3.39          | 0.00    |
| 35    | <i>COL1A2</i>    | -2.23          | 0.00    |
| 36    | <i>CPAMD8</i>    | -3.38          | 0.00    |
| 37    | <i>CPZ</i>       | -3.35          | 0.00    |
| 38    | <i>CSHL1,GH1</i> | -3.42          | 0.01    |
| 39    | <i>CTNND2</i>    | -4.12          | 0.00    |
| 40    | <i>CYP21A2</i>   | -2.83          | 0.02    |
| 41    | <i>CYP4A11</i>   | -3.99          | 0.02    |
| 42    | <i>CYP4F12</i>   | -4.83          | 0.00    |
| 43    | <i>DAPK1</i>     | -3.01          | 0.02    |
| 44    | <i>DCC</i>       | -4.72          | 0.00    |
| 45    | <i>DCHS1</i>     | -1.13          | 0.02    |
| 46    | <i>DCHS2</i>     | -2.75          | 0.03    |
| 47    | <i>DCN</i>       | -2.61          | 0.01    |
| 48    | <i>DMD</i>       | 2.70           | 0.00    |
| 49    | <i>DNAH9</i>     | -5.22          | 0.00    |
| 50    | <i>DOCK10</i>    | 1.17           | 0.04    |
| 51    | <i>DOK7</i>      | -2.27          | 0.03    |
| 52    | <i>DPCR1</i>     | -2.38          | 0.05    |
| 53    | <i>DPEP2</i>     | -3.54          | 0.02    |
| 54    | <i>DPP6</i>      | -3.87          | 0.01    |



|     |                    |       |      |
|-----|--------------------|-------|------|
| 55  | <i>DRC7</i>        | -5.38 | 0.01 |
| 56  | <i>DSPP</i>        | -2.78 | 0.02 |
| 57  | <i>DUSP15</i>      | -3.48 | 0.03 |
| 58  | <i>EHHADH</i>      | -1.08 | 0.01 |
| 59  | <i>ELN</i>         | -2.28 | 0.00 |
| 60  | <i>EMCN</i>        | 6.05  | 0.01 |
| 61  | <i>ENKD1</i>       | -2.95 | 0.03 |
| 62  | <i>EPB41L3</i>     | -2.02 | 0.01 |
| 63  | <i>ESPNL</i>       | -4.23 | 0.05 |
| 64  | <i>FAM53A</i>      | -1.14 | 0.03 |
| 65  | <i>FAM86B1</i>     | -1.00 | 0.03 |
| 66  | <i>FBN3</i>        | -5.34 | 0.04 |
| 67  | <i>FGD2</i>        | -3.12 | 0.02 |
| 68  | <i>FILIP1</i>      | -1.39 | 0.02 |
| 69  | <i>FLI1</i>        | -2.16 | 0.03 |
| 70  | <i>GAS7</i>        | -5.22 | 0.00 |
| 71  | <i>GCA</i>         | -0.93 | 0.01 |
| 72  | <i>GOLGA6L10</i>   | -1.27 | 0.05 |
| 73  | <i>GRM2</i>        | -2.60 | 0.05 |
| 74  | <i>GRM4</i>        | -3.58 | 0.00 |
| 75  | <i>GTF2A1L</i>     | -1.44 | 0.04 |
| 76  | <i>HOXA10</i>      | -3.41 | 0.02 |
| 77  | <i>HOXA3</i>       | -3.73 | 0.00 |
| 78  | <i>HP</i>          | -5.44 | 0.00 |
| 79  | <i>IRX4</i>        | -2.75 | 0.05 |
| 80  | <i>ITPR1</i>       | -0.85 | 0.04 |
| 81  | <i>KCNG1</i>       | -3.20 | 0.03 |
| 82  | <i>KCNMA1</i>      | -3.85 | 0.00 |
| 83  | <i>KIF1A</i>       | -5.49 | 0.01 |
| 84  | <i>KIF26B</i>      | -1.36 | 0.03 |
| 85  | <i>KLK2</i>        | -2.17 | 0.01 |
| 86  | <i>KLK8</i>        | -2.60 | 0.02 |
| 87  | <i>KRTAP10-1</i>   | -2.57 | 0.03 |
| 88  | <i>LCN10</i>       | -3.12 | 0.01 |
| 89  | <i>LGALS9C</i>     | -5.01 | 0.00 |
| 90  | <i>LGI1</i>        | -3.49 | 0.01 |
| 91  | <i>LILRA1</i>      | -2.44 | 0.01 |
| 92  | <i>LILRB1</i>      | -2.49 | 0.04 |
| 93  | <i>LRRC36</i>      | -3.66 | 0.00 |
| 94  | <i>LY9</i>         | -3.25 | 0.01 |
| 95  | <i>MARK1</i>       | -2.12 | 0.04 |
| 96  | <i>MASP1</i>       | -5.31 | 0.00 |
| 97  | <i>MCF2L</i>       | -2.05 | 0.01 |
| 98  | <i>MEFV</i>        | -2.20 | 0.02 |
| 99  | <i>MEI1</i>        | -1.88 | 0.05 |
| 100 | <i>Metazoa_SRP</i> | -3.57 | 0.00 |
| 101 | <i>MOG</i>         | -5.10 | 0.00 |
| 102 | <i>MPP2</i>        | -1.24 | 0.02 |
| 103 | <i>MT-ND6</i>      | -0.89 | 0.00 |
| 104 | <i>MUC17</i>       | -3.20 | 0.02 |
| 105 | <i>NAALADL1</i>    | -3.07 | 0.00 |
| 106 | <i>NCALD</i>       | -3.68 | 0.00 |
| 107 | <i>NEU4</i>        | -2.52 | 0.02 |
| 108 | <i>NFATC4</i>      | -2.58 | 0.00 |
| 109 | <i>NKX2-1</i>      | -2.26 | 0.01 |
| 110 | <i>NOS3</i>        | -2.33 | 0.05 |
| 111 | <i>NPNT</i>        | -2.50 | 0.04 |

|     |                     |       |      |
|-----|---------------------|-------|------|
| 112 | <i>NRCAM</i>        | -1.19 | 0.04 |
| 113 | <i>NRXN2</i>        | -2.21 | 0.05 |
| 114 | <i>OBSCN</i>        | -1.25 | 0.03 |
| 115 | <i>OLFM1</i>        | -3.36 | 0.01 |
| 116 | <i>OPRM1</i>        | -4.88 | 0.00 |
| 117 | <i>PARVB</i>        | -2.98 | 0.00 |
| 118 | <i>PBX1</i>         | -1.32 | 0.04 |
| 119 | <i>PCDHA1</i>       | -1.42 | 0.00 |
| 120 | <i>PDE9A</i>        | -2.24 | 0.02 |
| 121 | <i>PDZRN3</i>       | -5.13 | 0.00 |
| 122 | <i>PGA3</i>         | -3.36 | 0.04 |
| 123 | <i>PHOSPHO1</i>     | -4.22 | 0.02 |
| 124 | <i>PIK3R5</i>       | -5.34 | 0.00 |
| 125 | <i>PLA1A</i>        | -4.59 | 0.03 |
| 126 | <i>PNCK</i>         | -2.24 | 0.00 |
| 127 | <i>POTEH</i>        | -2.76 | 0.03 |
| 128 | <i>POU2AF1</i>      | -2.79 | 0.04 |
| 129 | <i>PPIL3</i>        | 0.67  | 0.02 |
| 130 | <i>PRDM16</i>       | -5.46 | 0.00 |
| 131 | <i>PRKCI</i>        | 0.70  | 0.04 |
| 132 | <i>PTGIR</i>        | -3.81 | 0.05 |
| 133 | <i>PTK7</i>         | -1.48 | 0.04 |
| 134 | <i>PTPN7</i>        | -1.97 | 0.03 |
| 135 | <i>RBFOX3</i>       | -3.09 | 0.01 |
| 136 | <i>RHOJ</i>         | -1.68 | 0.04 |
| 137 | <i>RIMBP3</i>       | -1.51 | 0.01 |
| 138 | <i>RIMS2</i>        | -1.25 | 0.05 |
| 139 | <i>RNF212</i>       | -3.73 | 0.00 |
| 140 | <i>RP11-92C4.3</i>  | -3.34 | 0.00 |
| 141 | <i>RP3-395M20.8</i> | 2.20  | 0.04 |
| 142 | <i>RP5-1101C3.1</i> | -2.18 | 0.01 |
| 143 | <i>SAG</i>          | -4.62 | 0.01 |
| 144 | <i>SALL1</i>        | -3.44 | 0.05 |
| 145 | <i>SAMD3</i>        | -1.77 | 0.01 |
| 146 | <i>SELPLG</i>       | -1.30 | 0.04 |
| 147 | <i>SEMA3A</i>       | -3.86 | 0.01 |
| 148 | <i>SERPINA3</i>     | -1.82 | 0.01 |
| 149 | <i>SH2D3C</i>       | -2.02 | 0.03 |
| 150 | <i>SHANK1</i>       | -2.59 | 0.05 |
| 151 | <i>SIGLEC14</i>     | -4.60 | 0.04 |
| 152 | <i>SLC12A5</i>      | -2.59 | 0.01 |
| 153 | <i>SLC13A5</i>      | -4.45 | 0.01 |
| 154 | <i>SLC2A14</i>      | -1.48 | 0.03 |
| 155 | <i>SLC38A5</i>      | -2.92 | 0.00 |
| 156 | <i>SLC4A10</i>      | -2.93 | 0.00 |
| 157 | <i>SOX9-AS1</i>     | 1.95  | 0.01 |
| 158 | <i>SPATA22</i>      | -3.37 | 0.00 |
| 159 | <i>SPATA31C1</i>    | -3.13 | 0.05 |
| 160 | <i>ST8SIA4</i>      | -1.19 | 0.02 |
| 161 | <i>STAB1</i>        | -7.26 | 0.01 |
| 162 | <i>STAT4</i>        | -2.85 | 0.03 |
| 163 | <i>STAT5A</i>       | -1.16 | 0.01 |
| 164 | <i>STRC</i>         | -3.73 | 0.02 |
| 165 | <i>STYK1</i>        | 1.10  | 0.03 |
| 166 | <i>SYNPO2</i>       | -1.22 | 0.04 |
| 167 | <i>SYT1</i>         | -1.67 | 0.05 |
| 168 | <i>TARSL2</i>       | -1.46 | 0.01 |

|     |                 |       |      |
|-----|-----------------|-------|------|
| 169 | <i>TASP1</i>    | 0.83  | 0.02 |
| 170 | <i>TBC1D3B</i>  | -1.06 | 0.02 |
| 171 | <i>TCEB3C</i>   | -2.82 | 0.00 |
| 172 | <i>TCF4</i>     | -1.24 | 0.01 |
| 173 | <i>TCHH</i>     | -1.83 | 0.01 |
| 174 | <i>TCP10</i>    | -4.07 | 0.03 |
| 175 | <i>TCP11</i>    | -2.35 | 0.00 |
| 176 | <i>TEX41</i>    | 1.89  | 0.00 |
| 177 | <i>TG</i>       | -3.85 | 0.00 |
| 178 | <i>THBS4</i>    | -2.90 | 0.04 |
| 179 | <i>THNSL2</i>   | -3.23 | 0.03 |
| 180 | <i>THSD7B</i>   | -2.26 | 0.02 |
| 181 | <i>TMEM108</i>  | -4.36 | 0.00 |
| 182 | <i>TMEM136</i>  | 0.66  | 0.04 |
| 183 | <i>TMEM221</i>  | -2.23 | 0.04 |
| 184 | <i>TMPRSS13</i> | -3.09 | 0.04 |
| 185 | <i>TNIP3</i>    | 0.99  | 0.04 |
| 186 | <i>TP63</i>     | -2.17 | 0.02 |
| 187 | <i>TPPP2</i>    | -3.20 | 0.01 |
| 188 | <i>TSHR</i>     | -2.62 | 0.02 |
| 189 | <i>TTC23</i>    | -0.81 | 0.04 |
| 190 | <i>TUBB4A</i>   | -2.93 | 0.01 |
| 191 | <i>UGT1A1</i>   | -2.38 | 0.01 |
| 192 | <i>UMOD</i>     | -4.45 | 0.00 |
| 193 | <i>VIT</i>      | -4.33 | 0.04 |
| 194 | <i>WNT5A</i>    | -5.97 | 0.00 |
| 195 | <i>ZBTB49</i>   | -1.03 | 0.01 |
| 196 | <i>ZBTB7C</i>   | -1.43 | 0.02 |
| 197 | <i>ZIC4</i>     | -4.75 | 0.00 |
| 198 | <i>ZNF195</i>   | 0.77  | 0.01 |
| 199 | <i>ZNF256</i>   | -1.20 | 0.05 |
| 200 | <i>ZNF536</i>   | -3.27 | 0.03 |
| 201 | <i>ZNF541</i>   | -3.04 | 0.05 |
| 202 | <i>ZNF774</i>   | -1.88 | 0.04 |

**Table S5: List of miRNAs binding to *DSCAM-AS1***

| <b>S.No.</b> | <b>miRNA</b>            | <b>Target Gene</b> |
|--------------|-------------------------|--------------------|
| 1            | <i>hsa-miR-627-3p</i>   | <i>DSCAM-AS1</i>   |
| 2            | <i>hsa-miR-6867-5p</i>  | <i>DSCAM-AS1</i>   |
| 3            | <i>hsa-miR-8082</i>     | <i>DSCAM-AS1</i>   |
| 4            | <i>hsa-miR-149-3p</i>   | <i>DSCAM-AS1</i>   |
| 5            | <i>hsa-miR-6129</i>     | <i>DSCAM-AS1</i>   |
| 6            | <i>hsa-miR-7154-5p</i>  | <i>DSCAM-AS1</i>   |
| 7            | <i>hsa-miR-4510</i>     | <i>DSCAM-AS1</i>   |
| 8            | <i>hsa-miR-6127</i>     | <i>DSCAM-AS1</i>   |
| 9            | <i>hsa-miR-3658</i>     | <i>DSCAM-AS1</i>   |
| 10           | <i>hsa-miR-539-5p</i>   | <i>DSCAM-AS1</i>   |
| 11           | <i>hsa-miR-6130</i>     | <i>DSCAM-AS1</i>   |
| 12           | <i>hsa-miR-5003-3p</i>  | <i>DSCAM-AS1</i>   |
| 13           | <i>hsa-miR-4659b-5p</i> | <i>DSCAM-AS1</i>   |
| 14           | <i>hsa-miR-6748-5p</i>  | <i>DSCAM-AS1</i>   |
| 15           | <i>hsa-miR-6787-3p</i>  | <i>DSCAM-AS1</i>   |
| 16           | <i>hsa-miR-2681-3p</i>  | <i>DSCAM-AS1</i>   |
| 17           | <i>hsa-miR-4758-5p</i>  | <i>DSCAM-AS1</i>   |
| 18           | <i>hsa-miR-3163</i>     | <i>DSCAM-AS1</i>   |
| 19           | <i>hsa-miR-186-5p</i>   | <i>DSCAM-AS1</i>   |
| 20           | <i>hsa-miR-4667-3p</i>  | <i>DSCAM-AS1</i>   |
| 21           | <i>hsa-miR-6874-5p</i>  | <i>DSCAM-AS1</i>   |
| 22           | <i>hsa-miR-5590-3p</i>  | <i>DSCAM-AS1</i>   |
| 23           | <i>hsa-miR-4297</i>     | <i>DSCAM-AS1</i>   |
| 24           | <i>hsa-miR-3922-3p</i>  | <i>DSCAM-AS1</i>   |
| 25           | <i>hsa-miR-4694-3p</i>  | <i>DSCAM-AS1</i>   |
| 26           | <i>hsa-miR-147a</i>     | <i>DSCAM-AS1</i>   |
| 27           | <i>hsa-miR-548x-3p</i>  | <i>DSCAM-AS1</i>   |
| 28           | <i>hsa-miR-548aj-3p</i> | <i>DSCAM-AS1</i>   |
| 29           | <i>hsa-miR-7974</i>     | <i>DSCAM-AS1</i>   |
| 30           | <i>hsa-miR-3174</i>     | <i>DSCAM-AS1</i>   |
| 31           | <i>hsa-miR-122-5p</i>   | <i>DSCAM-AS1</i>   |
| 32           | <i>hsa-miR-582-3p</i>   | <i>DSCAM-AS1</i>   |
| 33           | <i>hsa-miR-335-3p</i>   | <i>DSCAM-AS1</i>   |
| 34           | <i>hsa-miR-4646-5p</i>  | <i>DSCAM-AS1</i>   |
| 35           | <i>hsa-miR-181b-5p</i>  | <i>DSCAM-AS1</i>   |
| 36           | <i>hsa-miR-4294</i>     | <i>DSCAM-AS1</i>   |
| 37           | <i>hsa-miR-6797-5p</i>  | <i>DSCAM-AS1</i>   |
| 38           | <i>hsa-miR-6825-5p</i>  | <i>DSCAM-AS1</i>   |
| 39           | <i>hsa-miR-4726-3p</i>  | <i>DSCAM-AS1</i>   |
| 40           | <i>hsa-miR-1238-5p</i>  | <i>DSCAM-AS1</i>   |
| 41           | <i>hsa-miR-4534</i>     | <i>DSCAM-AS1</i>   |
| 42           | <i>hsa-miR-490-5p</i>   | <i>DSCAM-AS1</i>   |
| 43           | <i>hsa-miR-504-3p</i>   | <i>DSCAM-AS1</i>   |

|    |                        |                  |
|----|------------------------|------------------|
| 44 | <i>hsa-miR-4311</i>    | <i>DSCAM-AS1</i> |
| 45 | <i>hsa-miR-5680</i>    | <i>DSCAM-AS1</i> |
| 46 | <i>hsa-miR-181d-5p</i> | <i>DSCAM-AS1</i> |
| 47 | <i>hsa-miR-6124</i>    | <i>DSCAM-AS1</i> |
| 48 | <i>hsa-miR-574-5p</i>  | <i>DSCAM-AS1</i> |
| 49 | <i>hsa-miR-23b-5p</i>  | <i>DSCAM-AS1</i> |
| 50 | <i>hsa-miR-4669</i>    | <i>DSCAM-AS1</i> |
| 51 | <i>hsa-miR-1250-3p</i> | <i>DSCAM-AS1</i> |
| 52 | <i>hsa-miR-2392</i>    | <i>DSCAM-AS1</i> |
| 53 | <i>hsa-miR-7157-3p</i> | <i>DSCAM-AS1</i> |
| 54 | <i>hsa-miR-4728-5p</i> | <i>DSCAM-AS1</i> |
| 55 | <i>hsa-miR-583</i>     | <i>DSCAM-AS1</i> |
| 56 | <i>hsa-miR-4786-5p</i> | <i>DSCAM-AS1</i> |
| 57 | <i>hsa-miR-2355-3p</i> | <i>DSCAM-AS1</i> |
| 58 | <i>hsa-miR-5700</i>    | <i>DSCAM-AS1</i> |
| 59 | <i>hsa-miR-509-3p</i>  | <i>DSCAM-AS1</i> |
| 60 | <i>hsa-miR-6849-5p</i> | <i>DSCAM-AS1</i> |
| 61 | <i>hsa-miR-5581-5p</i> | <i>DSCAM-AS1</i> |
| 62 | <i>hsa-miR-4701-3p</i> | <i>DSCAM-AS1</i> |
| 63 | <i>hsa-miR-6793-5p</i> | <i>DSCAM-AS1</i> |
| 64 | <i>hsa-miR-3134</i>    | <i>DSCAM-AS1</i> |
| 65 | <i>hsa-miR-6133</i>    | <i>DSCAM-AS1</i> |
| 66 | <i>hsa-miR-3976</i>    | <i>DSCAM-AS1</i> |
| 67 | <i>hsa-miR-5692a</i>   | <i>DSCAM-AS1</i> |
| 68 | <i>hsa-miR-208a-5p</i> | <i>DSCAM-AS1</i> |
| 69 | <i>hsa-miR-1976</i>    | <i>DSCAM-AS1</i> |
| 70 | <i>hsa-miR-495-3p</i>  | <i>DSCAM-AS1</i> |
| 71 | <i>hsa-miR-129-5p</i>  | <i>DSCAM-AS1</i> |
| 72 | <i>hsa-miR-4695-3p</i> | <i>DSCAM-AS1</i> |
| 73 | <i>hsa-miR-4419a</i>   | <i>DSCAM-AS1</i> |
| 74 | <i>hsa-miR-6506-5p</i> | <i>DSCAM-AS1</i> |
| 75 | <i>hsa-miR-212-5p</i>  | <i>DSCAM-AS1</i> |
| 76 | <i>hsa-miR-6879-3p</i> | <i>DSCAM-AS1</i> |
| 77 | <i>hsa-miR-3126-5p</i> | <i>DSCAM-AS1</i> |
| 78 | <i>hsa-miR-380-3p</i>  | <i>DSCAM-AS1</i> |
| 79 | <i>hsa-miR-4802-3p</i> | <i>DSCAM-AS1</i> |
| 80 | <i>hsa-miR-204-3p</i>  | <i>DSCAM-AS1</i> |
| 81 | <i>hsa-miR-3925-5p</i> | <i>DSCAM-AS1</i> |
| 82 | <i>hsa-miR-5590-5p</i> | <i>DSCAM-AS1</i> |
| 83 | <i>hsa-miR-1343-3p</i> | <i>DSCAM-AS1</i> |
| 84 | <i>hsa-miR-6833-3p</i> | <i>DSCAM-AS1</i> |
| 85 | <i>hsa-miR-494-3p</i>  | <i>DSCAM-AS1</i> |
| 86 | <i>hsa-miR-4755-3p</i> | <i>DSCAM-AS1</i> |
| 87 | <i>hsa-miR-30a-3p</i>  | <i>DSCAM-AS1</i> |
| 88 | <i>hsa-miR-6083</i>    | <i>DSCAM-AS1</i> |
| 89 | <i>hsa-miR-6873-5p</i> | <i>DSCAM-AS1</i> |

|     |                         |                  |
|-----|-------------------------|------------------|
| 90  | <i>hsa-miR-619-5p</i>   | <i>DSCAM-AS1</i> |
| 91  | <i>hsa-miR-4659a-5p</i> | <i>DSCAM-AS1</i> |
| 92  | <i>hsa-miR-3176</i>     | <i>DSCAM-AS1</i> |
| 93  | <i>hsa-miR-5703</i>     | <i>DSCAM-AS1</i> |
| 94  | <i>hsa-miR-4261</i>     | <i>DSCAM-AS1</i> |
| 95  | <i>hsa-miR-6883-5p</i>  | <i>DSCAM-AS1</i> |
| 96  | <i>hsa-miR-559</i>      | <i>DSCAM-AS1</i> |
| 97  | <i>hsa-miR-6739-5p</i>  | <i>DSCAM-AS1</i> |
| 98  | <i>hsa-miR-1263</i>     | <i>DSCAM-AS1</i> |
| 99  | <i>hsa-miR-5692c</i>    | <i>DSCAM-AS1</i> |
| 100 | <i>hsa-miR-6866-5p</i>  | <i>DSCAM-AS1</i> |
| 101 | <i>hsa-miR-6737-3p</i>  | <i>DSCAM-AS1</i> |
| 102 | <i>hsa-miR-4762-3p</i>  | <i>DSCAM-AS1</i> |
| 103 | <i>hsa-miR-6733-5p</i>  | <i>DSCAM-AS1</i> |
| 104 | <i>hsa-miR-19b-2-5p</i> | <i>DSCAM-AS1</i> |
| 105 | <i>hsa-miR-4668-5p</i>  | <i>DSCAM-AS1</i> |
| 106 | <i>hsa-miR-19a-5p</i>   | <i>DSCAM-AS1</i> |
| 107 | <i>hsa-miR-6832-5p</i>  | <i>DSCAM-AS1</i> |
| 108 | <i>hsa-miR-4422</i>     | <i>DSCAM-AS1</i> |
| 109 | <i>hsa-miR-30e-3p</i>   | <i>DSCAM-AS1</i> |
| 110 | <i>hsa-miR-299-3p</i>   | <i>DSCAM-AS1</i> |
| 111 | <i>hsa-miR-5692b</i>    | <i>DSCAM-AS1</i> |
| 112 | <i>hsa-miR-6785-5p</i>  | <i>DSCAM-AS1</i> |
| 113 | <i>hsa-miR-6750-5p</i>  | <i>DSCAM-AS1</i> |
| 114 | <i>hsa-miR-6844</i>     | <i>DSCAM-AS1</i> |
| 115 | <i>hsa-miR-548t-5p</i>  | <i>DSCAM-AS1</i> |
| 116 | <i>hsa-miR-1303</i>     | <i>DSCAM-AS1</i> |
| 117 | <i>hsa-miR-548az-5p</i> | <i>DSCAM-AS1</i> |
| 118 | <i>hsa-miR-211-5p</i>   | <i>DSCAM-AS1</i> |
| 119 | <i>hsa-miR-379-3p</i>   | <i>DSCAM-AS1</i> |
| 120 | <i>hsa-miR-19b-1-5p</i> | <i>DSCAM-AS1</i> |
| 121 | <i>hsa-miR-579-3p</i>   | <i>DSCAM-AS1</i> |
| 122 | <i>hsa-miR-3686</i>     | <i>DSCAM-AS1</i> |
| 123 | <i>hsa-miR-4687-3p</i>  | <i>DSCAM-AS1</i> |
| 124 | <i>hsa-miR-30d-3p</i>   | <i>DSCAM-AS1</i> |
| 125 | <i>hsa-miR-411-5p</i>   | <i>DSCAM-AS1</i> |
| 126 | <i>hsa-miR-664b-3p</i>  | <i>DSCAM-AS1</i> |
| 127 | <i>hsa-miR-548u</i>     | <i>DSCAM-AS1</i> |
| 128 | <i>hsa-miR-6744-5p</i>  | <i>DSCAM-AS1</i> |
| 129 | <i>hsa-miR-411-3p</i>   | <i>DSCAM-AS1</i> |
| 130 | <i>hsa-miR-3911</i>     | <i>DSCAM-AS1</i> |
| 131 | <i>hsa-miR-4743-3p</i>  | <i>DSCAM-AS1</i> |
| 132 | <i>hsa-miR-1225-5p</i>  | <i>DSCAM-AS1</i> |
| 133 | <i>hsa-miR-153-5p</i>   | <i>DSCAM-AS1</i> |
| 134 | <i>hsa-miR-1229-3p</i>  | <i>DSCAM-AS1</i> |
| 135 | <i>hsa-miR-204-5p</i>   | <i>DSCAM-AS1</i> |

|     |                         |                  |
|-----|-------------------------|------------------|
| 136 | <i>hsa-miR-3121-5p</i>  | <i>DSCAM-AS1</i> |
| 137 | <i>hsa-miR-548at-5p</i> | <i>DSCAM-AS1</i> |
| 138 | <i>hsa-miR-4779</i>     | <i>DSCAM-AS1</i> |
| 139 | <i>hsa-miR-4262</i>     | <i>DSCAM-AS1</i> |
| 140 | <i>hsa-miR-1249-5p</i>  | <i>DSCAM-AS1</i> |
| 141 | <i>hsa-miR-7856-5p</i>  | <i>DSCAM-AS1</i> |
| 142 | <i>hsa-miR-483-5p</i>   | <i>DSCAM-AS1</i> |
| 143 | <i>hsa-miR-610</i>      | <i>DSCAM-AS1</i> |
| 144 | <i>hsa-miR-9-3p</i>     | <i>DSCAM-AS1</i> |
| 145 | <i>hsa-miR-3149</i>     | <i>DSCAM-AS1</i> |
| 146 | <i>hsa-miR-6758-5p</i>  | <i>DSCAM-AS1</i> |
| 147 | <i>hsa-miR-3135b</i>    | <i>DSCAM-AS1</i> |
| 148 | <i>hsa-miR-2054</i>     | <i>DSCAM-AS1</i> |
| 149 | <i>hsa-miR-150-3p</i>   | <i>DSCAM-AS1</i> |
| 150 | <i>hsa-miR-181a-5p</i>  | <i>DSCAM-AS1</i> |
| 151 | <i>hsa-miR-130a-3p</i>  | <i>DSCAM-AS1</i> |
| 152 | <i>hsa-miR-301a-3p</i>  | <i>DSCAM-AS1</i> |
| 153 | <i>hsa-miR-193b-3p</i>  | <i>DSCAM-AS1</i> |
| 154 | <i>hsa-miR-27a-3p</i>   | <i>DSCAM-AS1</i> |
| 155 | <i>hsa-miR-204-5p</i>   | <i>DSCAM-AS1</i> |
| 156 | <i>hsa-miR-137</i>      | <i>DSCAM-AS1</i> |
| 157 | <i>hsa-miR188-5p</i>    | <i>DSCAM-AS1</i> |
| 158 | <i>hsa-miR-186-5p</i>   | <i>DSCAM-AS1</i> |
| 159 | <i>hsa-miR-101</i>      | <i>DSCAM-AS1</i> |
| 160 | <i>hsa-miR-384</i>      | <i>DSCAM-AS1</i> |
| 161 | <i>hsa-miR-150-5p</i>   | <i>DSCAM-AS1</i> |
| 162 | <i>hsa-miR-2467-3p</i>  | <i>DSCAM-AS1</i> |
| 163 | <i>hsa-miR-338-3p</i>   | <i>DSCAM-AS1</i> |
| 164 | <i>hsa-miR-877-5p</i>   | <i>DSCAM-AS1</i> |
| 165 | <i>hsa-miR-204</i>      | <i>DSCAM-AS1</i> |
| 166 | <i>hsa-miR-101-3p</i>   | <i>DSCAM-AS1</i> |
| 167 | <i>hsa-miR-122-5p</i>   | <i>DSCAM-AS1</i> |
| 168 | <i>hsa-miR-216b</i>     | <i>DSCAM-AS1</i> |
| 169 | <i>hsa-miR-136</i>      | <i>DSCAM-AS1</i> |
| 170 | <i>hsa-mir-577</i>      | <i>DSCAM-AS1</i> |

**Table S6: List of miRNAs targeting 3'-UTR-ESR1**

| <b>S.No.</b> | <b>miRNA</b>            | <b>Target Gene</b> |
|--------------|-------------------------|--------------------|
| 1            | <i>hsa-miR-302c-3p</i>  | <i>ESR1</i>        |
| 2            | <i>hsa-miR-206</i>      | <i>ESR1</i>        |
| 3            | <i>hsa-miR-193b-3p</i>  | <i>ESR1</i>        |
| 4            | <i>hsa-miR-18b-5p</i>   | <i>ESR1</i>        |
| 5            | <i>hsa-miR-18a-5p</i>   | <i>ESR1</i>        |
| 6            | <i>hsa-miR-22-3p</i>    | <i>ESR1</i>        |
| 7            | <i>hsa-miR-19a-3p</i>   | <i>ESR1</i>        |
| 8            | <i>hsa-miR-29b-3p</i>   | <i>ESR1</i>        |
| 9            | <i>hsa-miR-19b-3p</i>   | <i>ESR1</i>        |
| 10           | <i>hsa-miR-20b-5p</i>   | <i>ESR1</i>        |
| 11           | <i>hsa-miR-221-3p</i>   | <i>ESR1</i>        |
| 12           | <i>hsa-miR-222-3p</i>   | <i>ESR1</i>        |
| 13           | <i>hsa-miR-130a-3p</i>  | <i>ESR1</i>        |
| 14           | <i>hsa-miR-26a-5p</i>   | <i>ESR1</i>        |
| 15           | <i>hsa-miR-145-5p</i>   | <i>ESR1</i>        |
| 16           | <i>hsa-miR-3668</i>     | <i>ESR1</i>        |
| 17           | <i>hsa-miR-4671-3p</i>  | <i>ESR1</i>        |
| 18           | <i>hsa-miR-4709-3p</i>  | <i>ESR1</i>        |
| 19           | <i>hsa-miR-7852-3p</i>  | <i>ESR1</i>        |
| 20           | <i>hsa-miR-100-5p</i>   | <i>ESR1</i>        |
| 21           | <i>hsa-miR-142-3p</i>   | <i>ESR1</i>        |
| 22           | <i>hsa-miR-6073</i>     | <i>ESR1</i>        |
| 23           | <i>hsa-miR-6757-3p</i>  | <i>ESR1</i>        |
| 24           | <i>hsa-miR-4422</i>     | <i>ESR1</i>        |
| 25           | <i>hsa-miR-548e-5p</i>  | <i>ESR1</i>        |
| 26           | <i>hsa-miR-454-3p</i>   | <i>ESR1</i>        |
| 27           | <i>hsa-miR-130b-3p</i>  | <i>ESR1</i>        |
| 28           | <i>hsa-miR-301a-3p</i>  | <i>ESR1</i>        |
| 29           | <i>hsa-miR-301b-3p</i>  | <i>ESR1</i>        |
| 30           | <i>hsa-miR-4295</i>     | <i>ESR1</i>        |
| 31           | <i>hsa-miR-3666</i>     | <i>ESR1</i>        |
| 32           | <i>hsa-miR-129-5p</i>   | <i>ESR1</i>        |
| 33           | <i>hsa-miR-874-3p</i>   | <i>ESR1</i>        |
| 34           | <i>hsa-miR-3157-3p</i>  | <i>ESR1</i>        |
| 35           | <i>hsa-miR-4290</i>     | <i>ESR1</i>        |
| 36           | <i>hsa-miR-5582-3p</i>  | <i>ESR1</i>        |
| 37           | <i>hsa-miR-548x-3p</i>  | <i>ESR1</i>        |
| 38           | <i>hsa-miR-548j-3p</i>  | <i>ESR1</i>        |
| 39           | <i>hsa-miR-548aq-3p</i> | <i>ESR1</i>        |
| 40           | <i>hsa-miR-548am-3p</i> | <i>ESR1</i>        |
| 41           | <i>hsa-miR-548aj-3p</i> | <i>ESR1</i>        |
| 42           | <i>hsa-miR-548ah-3p</i> | <i>ESR1</i>        |
| 43           | <i>hsa-miR-548ae-3p</i> | <i>ESR1</i>        |



|    |                         |             |
|----|-------------------------|-------------|
| 44 | <i>hsa-miR-5589-3p</i>  | <i>ESR1</i> |
| 45 | <i>hsa-miR-520e</i>     | <i>ESR1</i> |
| 46 | <i>hsa-miR-520d-3p</i>  | <i>ESR1</i> |
| 47 | <i>hsa-miR-520c-3p</i>  | <i>ESR1</i> |
| 48 | <i>hsa-miR-520b</i>     | <i>ESR1</i> |
| 49 | <i>hsa-miR-520a-3p</i>  | <i>ESR1</i> |
| 50 | <i>hsa-miR-373-3p</i>   | <i>ESR1</i> |
| 51 | <i>hsa-miR-372-3p</i>   | <i>ESR1</i> |
| 52 | <i>hsa-miR-302e</i>     | <i>ESR1</i> |
| 53 | <i>hsa-miR-302d-3p</i>  | <i>ESR1</i> |
| 54 | <i>hsa-miR-302b-3p</i>  | <i>ESR1</i> |
| 55 | <i>hsa-miR-302a-3p</i>  | <i>ESR1</i> |
| 56 | <i>hsa-miR-519c-3p</i>  | <i>ESR1</i> |
| 57 | <i>hsa-miR-519b-3p</i>  | <i>ESR1</i> |
| 58 | <i>hsa-miR-519a-3p</i>  | <i>ESR1</i> |
| 59 | <i>hsa-miR-548z</i>     | <i>ESR1</i> |
| 60 | <i>hsa-miR-548h-3p</i>  | <i>ESR1</i> |
| 61 | <i>hsa-miR-548d-3p</i>  | <i>ESR1</i> |
| 62 | <i>hsa-miR-548bb-3p</i> | <i>ESR1</i> |
| 63 | <i>hsa-miR-548ac</i>    | <i>ESR1</i> |
| 64 | <i>hsa-miR-7855-5p</i>  | <i>ESR1</i> |
| 65 | <i>hsa-miR-9-5p</i>     | <i>ESR1</i> |
| 66 | <i>hsa-miR-4264</i>     | <i>ESR1</i> |
| 67 | <i>hsa-miR-4797-3p</i>  | <i>ESR1</i> |
| 68 | <i>hsa-miR-3121-5p</i>  | <i>ESR1</i> |
| 69 | <i>hsa-miR-1910-5p</i>  | <i>ESR1</i> |
| 70 | <i>hsa-miR-26b-3p</i>   | <i>ESR1</i> |
| 71 | <i>hsa-miR-192-5p</i>   | <i>ESR1</i> |
| 72 | <i>hsa-miR-335-3p</i>   | <i>ESR1</i> |
